# Supplementary material
Source: ML conference proceedings conference paper supplement (https://openreview.net/forum?id=QNpBrPiUUW)
Supplement: supplementary_material [file data.xlsx]

## Sheet: 东线数据清洗
15	5.71353	15594.4	3.063	-0.668502	1.10969	2.11388	5.41784	2560.61	1.16213	2866.14	1.26095	11	8	51	433	23.1419	22.1846	61623.9	1.05097	314.48	406.042	2.43981	3.988	12.6848	16.6788	15.639	15.9297	2.7894	1.91143	3.92207	2.98936	0.245028
16	5.93819	15940.5	3.18193	-0.619403	1.11114	2.10871	5.68881	2563	1.19719	2886.09	1.31251	10	6	55	410	23.559	21.548	57953.8	1.1	310.06	411.881	2.40416	4.94369	15.3503	19.3058	17.9886	18.3173	2.80141	1.91143	3.92207	2.98936	0.245028
17	6.20993	16305.1	3.26906	-0.654709	1.13206	2.0991	5.56143	2525.68	1.21246	2758.38	1.30926	11	7	50	451	22.054	20.3762	59628.9	1.08002	308.027	401.202	2.38987	3.94947	16.6732	18.9455	18.3574	17.7406	2.78687	1.91143	3.92207	2.98936	0.245028
18	6.29699	17126.1	3.13205	-0.621763	0.948209	2.08727	5.62114	2515.6	1.20582	2850.22	1.29937	11	7	55	382	21.6289	18.5036	56635.1	1.17136	309.705	409.118	2.39521	4.56065	11.9848	14.2517	13.7583	14.0572	2.78296	1.91143	3.92207	2.98936	0.245028
19	6.30576	17170.8	3.11129	-0.55079	0.891233	2.16772	5.5316	2390.55	1.21488	2746.79	1.30199	14	11	56	474	22.7571	19.2363	58452.2	1.18989	281.526	398.14	2.41543	4.97223	12.2444	14.9744	14.0941	14.8736	2.81478	1.91143	3.92207	2.98936	0.245028
20	6.50616	17812.9	3.21296	-0.603057	1.20328	2.21004	5.58624	2513.86	1.19527	2831.01	1.2955	11	7	52	413	21.6135	20.4231	59665.4	1.06181	312.509	394.598	2.51991	4.31269	15.8303	17.4654	17.4112	17.1898	2.90127	1.91143	3.92207	2.98936	0.245028
21	6.81011	17748.5	3.38283	-0.53014	1.25409	2.1996	5.55828	2502.83	1.22704	2779.3	1.28975	12	9	58	433	20.1226	19.1758	60265.4	1.05	307	398.796	2.50605	4.41559	11.8883	14.1535	13.8387	14.5219	2.88492	1.91143	3.92207	2.98936	0.245028
22	6.95677	18059.4	3.4808	-0.634324	1.44933	2.12768	5.84241	2681.63	1.2234	2913.59	1.30938	11	7	54	532	22.6214	18.3585	60052.8	1.23875	327.827	415.906	2.44165	5.14381	16.5931	18.3683	17.7778	18.8097	2.89564	1.91143	3.92207	2.98936	0.245028
23	7.15139	18255	3.17929	-0.624619	0.932008	2.23661	5.51151	2360.44	1.21611	2646.69	1.3011	13	9	48	410	20.6653	17.6814	60401.9	1.17538	286	389.82	2.49794	5.69025	11.4798	12.8654	12.7467	12.7863	2.89864	1.91143	3.92207	2.98936	0.245028
24	7.21404	18508.7	3.15311	-0.616805	0.957261	2.26224	5.40428	2452.6	1.21306	2703.78	1.29982	12	8	52	432	20.4544	16.6332	58975.6	1.23164	295.373	386.244	2.49627	4.94572	11.4049	12.9798	12.6189	12.749	2.9004	1.91143	3.92207	2.98936	0.245028
25	7.66265	18776.9	3.22029	-0.591718	0.772362	2.2617	5.40476	2200.27	1.22182	2530.28	1.30562	12	8	51	380	21.1437	17.2296	60652.6	1.2381	273.701	379.058	2.50357	3.51017	11.0826	11.8416	11.6466	11.6746	2.87714	1.91143	3.92207	2.98936	0.245028
26	7.26769	18093	3.60249	-0.626888	1.74663	2.15237	5.81895	2814.16	1.19059	2976.37	1.27347	11	8	48	483	23.903	18.4409	59325.1	1.30736	352.723	423.414	2.47883	4.81278	12.5204	13.968	13.2064	14.0361	2.88234	1.91143	3.92207	2.98936	0.245028
27	7.20871	18722.5	3.53644	-0.630029	1.47901	2.2262	5.84519	2600.53	1.20695	2936.73	1.30288	10	7	50	355	24.6442	18.6325	60196.7	1.32	330.808	414.327	2.5551	5.94913	11.526	12.9377	12.3223	12.8936	2.99815	1.91143	3.92207	2.98936	0.245028
28	7.51896	18548.8	3.41699	-0.555742	1.10667	2.2799	5.48565	2396.31	1.19971	2742.37	1.27895	14	9	51	409	23.2297	18.2251	60882.1	1.27746	300.272	392.134	2.54587	4.94716	9.52965	12.2574	11.5498	11.8831	2.89519	1.91143	3.92207	2.98936	0.245028
29	7.07774	18857.2	3.23921	-0.58427	0.957773	2.26961	5.49142	2283.09	1.20116	2629.38	1.29421	13	9	47	469	23.6197	18.5339	60033.8	1.28703	289.828	388.522	2.54977	4.88892	11.8183	12.962	12.8189	13.0505	2.9099	1.91143	3.92207	2.98936	0.245028
30	7.06545	18150.1	3.21262	-0.578465	0.942643	2.12042	5.43694	2399.8	1.20483	2749.38	1.29459	13	10	61	631	23.5792	18.5941	60164.2	1.28572	289.682	400.906	2.53198	3.96776	10.875	12.4192	12.075	13.0754	2.91167	1.91143	3.92207	2.98936	0.245028
31	6.97625	18145.8	3.08701	-0.538903	0.981571	2.19875	5.57855	2514.43	1.19139	2854.61	1.28485	12	9	52	508	23.8728	19.0494	56884.7	1.26369	296.341	402.598	2.54446	5.42996	11.371	12.7686	12.7818	13.3236	2.88955	1.91143	3.92207	2.98936	0.245028
32	7.04251	17866.6	3.08045	-0.583598	0.953205	2.20397	5.59038	2519.13	1.20574	2861.42	1.28427	13	9	48	539	25.1265	19.9672	57717	1.26101	295.237	414.611	2.51089	5.57566	13.6431	11.0627	15.4135	16.4054	2.89913	1.91143	3.92207	2.98936	0.245028
33	7.44387	18882.4	3.48193	-0.624074	1.55216	2.18321	6.14529	2807.42	1.22142	2987.71	1.29854	9	7	49	385	24.7519	19.6191	59814.4	1.26	338.868	430.506	2.50954	4.82147	11.0567	12.4942	12.2564	13.2231	2.91062	1.91143	3.92207	2.98936	0.245028
34	6.7684	18537.7	3.21995	-0.587162	1.1377	2.32432	5.57104	2513.29	1.18152	2835.99	1.27674	11	7	50	599	21.9577	16.9131	60398	1.3	309.194	404.917	2.59542	5.77007	11.151	12.6947	12.0538	12.8721	2.9891	1.91143	3.92207	2.98936	0.245028
35	6.90013	18377.6	3.16314	-0.54414	1.17039	2.24339	5.90125	2650.93	1.17863	2965.07	1.27866	10	7	52	542	25.3195	19.1434	58859.8	1.32	313.299	419.768	2.58768	6.31275	12.0179	14.098	13.1772	13.7017	3.00644	1.91143	3.92207	2.98936	0.245028
36	6.6142	17874.1	3.23047	-0.617452	1.16362	2.30778	5.72014	2561.38	1.17513	2831.24	1.2788	10	7	54	596	22.4526	17.4394	58729.3	1.29	312	405.755	2.60465	4.87514	12.1558	14.8229	13.2996	14.3798	2.99872	1.91143	3.92207	2.98936	0.245028
37	6.61416	18362.3	3.29675	-0.637808	1.29187	2.16694	5.66314	2675.47	1.18789	2955.47	1.26672	14	10	55	530	22.2336	17.3559	57490.6	1.28376	325.756	416.114	2.56528	5.8988	11.9375	14.3543	13.1678	13.7064	3.00168	1.91143	3.92207	2.98936	0.245028
38	7.2096	19001.6	3.28192	-0.612877	1.09973	2.32285	5.77919	2520.14	1.20416	2813.04	1.28777	10	8	54	442	21.571	16.6339	57640.6	1.29948	306.967	403.104	2.60598	6.71796	11.2706	13.9742	12.7313	13.3686	2.98881	1.91143	3.92207	2.98936	0.245028
39	7.62035	19019.2	3.112	-0.612286	0.954857	2.25212	5.99245	2569.63	1.21586	2905.34	1.29151	13	8	52	637	24.5578	18.0703	61223.5	1.36	295.851	417	2.58403	5.43712	12.848	14.767	13.9916	14.1427	2.98369	1.91143	3.92207	2.98936	0.245028
40	8.15225	20114.2	3.16944	-0.620266	1.12359	2.15425	6.25726	2777.49	1.21851	2984.74	1.30171	10	7	55	596	25.3973	19.0416	60688.1	1.33315	310.375	435.068	2.56325	5.0875	13.048	15.2603	14.037	14.6995	2.97955	1.91143	3.92207	2.98936	0.245028
41	8.53532	20246.8	3.16422	-0.585263	0.883067	2.18842	6.12474	2519.04	1.2453	2901.94	1.31352	10	7	51	546	25.3176	19.425	63709.9	1.3	286.518	420.029	2.60206	4.52635	11.0826	12.4544	11.765	11.633	2.97717	1.91143	3.92207	2.98936	0.245028
42	9.08327	21456.9	3.11503	-0.561995	0.737908	2.17709	6.31833	2480.75	1.26132	2885.04	1.33729	11	6	51	571	26.3698	20.5585	63773.7	1.2834	273.843	427.019	2.59224	4.43261	12.4124	14.1023	13.4449	12.7118	2.97092	1.91143	3.92207	2.98936	0.245028
43	9.54785	22470.4	3.28519	-0.560494	0.938519	2.21901	6.28173	2600.56	1.28497	2880.74	1.33376	9	7	57	419	23.6425	18.2289	63866.1	1.3	290.069	422.123	2.62197	4.20818	12.4056	15.4693	15.0522	15.7796	2.99988	1.91143	3.92207	2.98936	0.245028
44	8.40145	20235.9	3.16493	-0.612174	1.19282	2.11217	5.99797	2677.81	1.19041	2943.52	1.29333	12	7	53	556	24.5926	18.8392	61222.5	1.30876	316	426.627	2.61022	4.27389	13.6626	15.207	14.548	14.9343	3.00632	1.91143	3.92207	2.98936	0.245028
45	7.95659	19953.6	3.14626	-0.529801	0.865241	2.3713	5.82737	2382.65	1.19357	2732.89	1.28798	14	9	47	639	21.7267	16.5146	61828.5	1.31684	279.963	401.898	2.61967	5.53794	15.4376	17.8544	16.9605	16.7391	3.02512	1.91143	3.92207	2.98936	0.245028
46	8.51348	21010	3.23407	-0.588717	0.917694	2.3135	5.94624	2465.85	1.21388	2818.08	1.29445	11	7	50	585	22.4458	17.3571	63911.5	1.29	288.432	402.973	2.62443	6.4836	15.1044	22.502	16.8793	16.384	3.00304	1.91143	3.92207	2.98936	0.245028
47	8.65527	20823.6	3.27139	-0.628505	0.992918	2.19235	5.66657	2448.65	1.20905	2777.19	1.28365	11	7	51	505	22.8117	17.5112	69633.9	1.3	297.623	406.119	2.65404	4.40651	10.9327	12.8884	12.1192	12.8855	3.01895	1.91143	3.92207	2.98936	0.245028
48	8.56124	21076	3.20983	-0.63764	1.16636	2.29026	6.05731	2679.81	1.20631	2912.27	1.28515	11	8	52	562	22.3664	17.1773	66374.7	1.31144	313.965	411.143	2.63821	5.45145	13.3663	14.8461	14.1853	14.2162	3.01974	1.91143	3.92207	2.98936	0.245028
49	7.99693	20165	3.20082	-0.638914	1.37127	2.26787	6.04066	2853.7	1.19991	2981.86	1.27849	11	7	47	600	21.5403	16.6552	62938.1	1.29	334.552	435.036	2.60069	6.07605	21.3784	23.1967	22.3498	22.694	3.01617	1.91143	3.92207	2.98936	0.245028
50	7.45087	19858.3	3.21866	-0.614023	1.02646	2.40046	5.89494	2472	1.1914	2803.96	1.28441	20	11	51	508	22.5566	17.371	63562.4	1.2994	300.181	405.644	2.6474	5.27437	11.6685	12.782	12.5466	13.0665	3.01866	1.91143	3.92207	2.98936	0.245028
51	7.78094	19596.1	3.31667	-0.618667	1.11533	2.34258	6.0989	2450.68	1.19413	2853.13	1.30047	8	6	52	282	26.531	20.0819	62178.6	1.32	302.517	418.187	2.65609	4.92555	9.89283	12.4594	11.5176	13.1009	3.04286	1.91143	3.92207	2.98936	0.245028
52	7.78149	20227.5	3.29969	-0.647095	1.02385	2.36625	6.01184	2398.41	1.20134	2789.51	1.29868	9	6	53	373	25.4196	19.4851	62520.2	1.3	297.911	399.474	2.66032	4.96477	13.9035	15.9738	15.4063	16.2302	3.02503	1.91143	3.92207	2.98936	0.245028
53	7.92657	20057.2	3.36792	-0.680563	1.57268	2.29521	6.70366	2911.81	1.20162	2988.99	1.30458	8	6	51	338	26.6828	20.5552	62498.6	1.3	347.496	455.096	2.64749	4.80085	13.2188	14.8029	14.6998	14.8577	3.0299	1.91143	3.92207	2.98936	0.245028
54	7.44563	20146.4	3.20627	-0.641595	1.14729	2.43263	6.17042	2750.75	1.20253	2955.42	1.2871	11	7	53	569	23.2444	17.9345	65271.1	1.29995	313.849	420.43	2.62593	5.38794	14.7754	16.4081	15.8518	16.4675	3.02427	1.91143	3.92207	2.98936	0.245028
55	7.53356	20059.2	3.27702	-0.641246	1.04273	2.48484	6.15746	2538.01	1.20032	2899.28	1.29571	10	7	53	522	23.9702	18.5081	66750	1.29134	301.611	414.259	2.67829	5.17326	18.0714	23.6862	18.972	19.1592	3.06659	1.91143	3.92207	2.98936	0.245028
56	7.16518	20493.2	3.27348	-0.620649	1.15546	2.47762	6.28759	2759.06	1.19599	2952.35	1.28594	13	7	53	416	24.0489	18.4175	64989.6	1.31	313.254	424.703	2.65992	5.85109	16.3287	21.7544	17.1247	17.2701	3.08428	1.91143	3.92207	2.98936	0.245028
57	7.37733	20330.6	3.20653	-0.585086	0.864392	2.49364	6.11174	2415.82	1.20801	2822.2	1.28972	10	7	51	426	23.7491	18.4071	63074.3	1.29	283.748	406.279	2.66228	6.22638	16.7484	22.2701	17.6495	17.7381	3.06666	1.91143	3.92207	2.98936	0.245028
58	8.17945	21089.9	3.28212	-0.634426	0.998907	2.36358	6.31913	2483.93	1.23084	2805.82	1.32101	9	6	51	349	26.7798	20.6954	66830.6	1.29445	297	417.322	2.66417	4.58887	22.9646	24.0966	24.3139	24.3804	3.06839	1.91143	3.92207	2.98936	0.245028
59	8.18598	21347.5	3.28877	-0.607018	0.987719	2.54	6.29826	2417.14	1.2101	2802.88	1.3269	9	6	52	299	28.4449	21.9159	66713.8	1.3	294.996	414.481	2.69978	5.33051	22.7596	22.8093	24.076	24.3697	3.11854	1.91143	3.92207	2.98936	0.245028
60	7.86038	20760.8	3.34983	-0.6	1.00337	2.54139	6.23361	2400.05	1.20349	2755.38	1.3252	9	6	48	289	26.8828	20.6956	64691.1	1.3	297.946	411.35	2.71337	6.41007	13.4122	11.106	14.8296	14.785	3.13535	1.91143	3.92207	2.98936	0.245028
61	7.90226	21001.2	3.34664	-0.645973	1.17785	2.53823	6.0896	2683.59	1.18877	2937.11	1.29146	12	8	53	285	27.692	21.2529	67441.1	1.3	325.133	412.664	2.74051	4.83743	16.6889	16.3884	18.3443	18.1536	3.11745	1.91143	3.92207	2.98936	0.245028
62	7.24619	20256.8	3.39046	-0.640615	1.43815	2.48503	6.37208	2864.34	1.176	2999.22	1.26956	11	7	53	281	24.9505	19.1853	65760.2	1.3001	339.942	434.396	2.75602	4.71463	11.9794	13.6997	13.296	12.821	3.11813	1.91143	3.92207	2.98936	0.245028
63	7.43699	20351.4	3.3659	-0.622378	1.27168	2.54711	6.34711	2702.89	1.196	2985.34	1.28027	10	7	52	387	26.5697	20.3199	66041	1.31058	325	426.679	2.7414	4.47153	22.0512	18.8287	18.919	18.7547	3.13543	1.91143	3.92207	2.98936	0.245028
64	7.53037	20543.5	3.32795	-0.681063	1.31233	2.51836	6.49534	2787.36	1.19748	2986.18	1.29565	9	6	50	339	25.7326	19.6995	63278.5	1.31	328	434.192	2.74179	4.31863	18.8087	15.4207	16.1471	15.9955	3.13064	1.91143	3.92207	2.98936	0.245028
65	7.48116	20097.1	3.3217	-0.631401	1.1349	2.57705	6.26691	2585.79	1.20792	2905.88	1.28158	10	7	50	324	24.0676	18.465	64109.5	1.3	312.305	416.423	2.72766	4.30873	10.212	12.9383	13.0286	13.2096	3.11617	1.91143	3.92207	2.98936	0.245028
66	7.58199	20188.9	3.39681	-0.636499	1.23799	2.57328	6.33946	2582.44	1.19827	2914.31	1.29449	10	7	53	287	25.1512	19.385	63577.7	1.3	314.32	420.556	2.73013	4.05699	9.47792	11.476	11.8099	12.1243	3.13591	1.91143	3.92207	2.98936	0.245028
67	6.89998	19243.6	3.29544	-0.613029	0.928763	2.53656	6.34651	2417.78	1.2092	2736.03	1.32725	9	6	54	295	25.4003	19.4821	61481.2	1.2998	291	414.54	2.73901	5.35827	13.3039	15.6895	16.3304	16.5877	3.12125	1.91143	3.92207	2.98936	0.245028
68	7.44788	19722.2	3.29872	-0.6	0.980511	2.56491	6.34697	2482.75	1.20664	2803.48	1.30881	9	6	50	229	26.9106	20.7354	62331.8	1.3	298	416.467	2.73977	6.19327	12.227	13.5756	13.4685	13.48	3.12207	1.91143	3.92207	2.98936	0.245028
70	6.92227	19208.6	3.36095	-0.613902	1.19586	2.61244	6.08994	2704.32	1.19956	2936.61	1.27368	11	8	52	363	24.5888	19.051	63333.7	1.29	322.527	419.937	2.78001	5.6443	12.5668	14.7104	14.0095	14.143	3.18479	1.91143	3.92207	2.98936	0.245028
71	7.15387	18927.9	3.34451	-0.672544	1.27104	2.59824	6.4529	2692.97	1.18516	2965.35	1.28053	10	7	48	320	24.9013	18.3793	63743.3	1.36899	328.982	428.592	2.79786	5.80038	11.9516	13.7655	13.489	13.1155	3.19793	1.91143	3.92207	2.98936	0.245028
72	7.44562	19363.9	3.40683	-0.67351	1.21424	2.64645	6.43607	2615.56	1.18043	2949.15	1.29295	10	7	53	347	26.5921	19.3511	64109.1	1.37587	320.828	423.642	2.82719	5.37715	14.3439	16.2817	15.6224	15.8257	3.21298	1.91143	3.92207	2.98936	0.245028
73	7.98952	19699.7	3.39578	-0.658445	1.34343	2.46981	6.48571	2717.83	1.20366	2992.4	1.29169	9	6	55	367	26.7944	19.4914	66090	1.37039	329.761	436.528	2.81947	5.10107	14.8296	21.7851	16.1036	16.4442	3.22473	1.91143	3.92207	2.98936	0.245028
75	7.8003	19489	3.37208	-0.651203	1.01167	2.60412	6.58591	2433.44	1.20417	2839.54	1.32052	9	6	54	311	30.8801	22.2708	65042	1.39247	298.921	427.23	2.81283	5.51164	11.8364	14.4401	13.5836	13.8676	3.22661	1.91143	3.92207	2.98936	0.245028
76	7.64443	19351	3.42519	-0.610902	1.08459	2.43571	6.28797	2494.2	1.19865	2839.93	1.31279	8	5	50	245	29.0252	20.8096	63817.6	1.4	306.453	432.267	2.81589	6.26005	12.7884	15.0567	14.0989	14.7849	3.23206	1.91143	3.92207	2.98936	0.245028
77	8.30837	19846.6	3.38159	-0.642985	1.1444	2.58896	6.6409	2625.16	1.19285	2908.34	1.29642	10	7	52	261	29.2057	21.831	66307.7	1.32238	312.516	433.101	2.81707	5.40422	11.9671	13.8633	12.8187	13.5893	3.20884	1.91143	3.92207	2.98936	0.245028
78	7.11551	19358.7	3.39911	-0.610319	1.21339	2.62776	6.36339	2622.79	1.19889	2929.14	1.28559	10	7	54	402	24.4973	17.7646	66239.3	1.38	318.786	425.452	2.81783	4.76299	13.7628	20.6578	19.2931	20.2726	3.20975	1.91143	3.92207	2.98936	0.245028
79	7.93336	19366.4	3.40825	-0.654223	1.28529	2.59237	6.46865	2574.05	1.18948	2910.43	1.29725	9	6	52	349	26.2548	19.1166	66125.4	1.37003	316.165	434.033	2.8257	4.88682	15.4588	16.9796	16.2384	17.0423	3.20708	1.91143	3.92207	2.98936	0.245028
80	7.47976	19284.4	3.38021	-0.617479	1.12604	2.45972	6.72607	2570.77	1.19473	2933.02	1.30507	8	6	53	305	27.6298	19.9576	63124	1.38072	309.434	435.668	2.8091	5.28223	14.0506	15.7416	14.6643	15.3212	3.20936	1.91143	3.92207	2.98936	0.245028
81	7.99723	19575.4	3.39533	-0.62	1.19933	2.57967	6.77857	2681.11	1.21605	2944.2	1.30206	9	6	54	364	26.4566	19.2396	64538.8	1.37	314.943	437.962	2.84122	4.90007	15.7218	18.1607	16.4757	17.7112	3.22319	1.91143	3.92207	2.98936	0.245028
82	7.97065	19792.7	3.39025	-0.633134	1.10722	2.37726	6.72744	2580.87	1.22832	2950.81	1.32438	8	5	55	340	28.6299	20.6349	63739.4	1.37863	307.159	442.627	2.82081	4.59672	20.9227	22.7278	21.0785	22.4926	3.22551	1.91143	3.92207	2.98936	0.245028
83	7.63626	19468.4	3.46679	-0.665179	1.3756	2.37545	7.02738	2708.13	1.19941	2947.32	1.31803	8	5	54	233	27.9988	19.8548	64990	1.41	330.857	445.736	2.84083	2.95912	11.5569	13.4919	12.0472	12.94	3.22479	1.91143	3.92207	2.98936	0.245028
84	7.54222	19714.1	3.37786	-0.626101	1.2229	2.60629	6.96226	2575.77	1.17725	2933.82	1.31768	9	5	55	306	31.0113	23.3421	61806	1.32989	322	449.582	2.8435	5.57976	13.0331	23.6418	21.2889	23.1346	3.22539	1.91143	3.92207	2.98936	0.245028
85	7.30827	19490.4	3.39853	-0.623162	1.21307	2.61003	6.84286	2486.43	1.157	2907.99	1.31101	11	5	52	327	29.7647	22.5252	63474.4	1.32	315	432.919	2.85566	4.93454	21.1117	18.9344	22.4104	18.9305	3.22675	1.91143	3.92207	2.98936	0.245028
86	6.10754	18072.9	3.36301	-0.636951	1.0906	2.67183	6.56331	2536.02	1.19388	2808.44	1.27113	19	8	52	205	27.4972	21.0413	66032.4	1.30132	307.214	426.641	2.82329	4.66399	11.0532	13.4022	12.6176	14.1074	3.18741	1.91143	3.92207	2.98936	0.245028
87	6.72995	19070.3	3.43107	-0.62	1.27294	2.61	6.89735	2545.09	1.18456	2892.98	1.31425	12	5	53	191	28.5735	21.3088	60949.8	1.34	315.025	443.071	2.83689	5.0861	11.3702	13.2715	12.7293	13.9421	3.18992	1.91143	3.92207	2.98936	0.245028
88	7.58244	19847.1	3.44295	-0.646537	1.18658	2.57258	6.89806	2605.04	1.21763	2896.51	1.30486	20	9	57	269	26.6665	20.1604	65615.1	1.32554	311.611	441.38	2.84256	3.53029	11.9614	13.6719	13.6574	13.603	3.21588	1.91143	3.92207	2.98936	0.245028
110	6.89869	21942.2	3.68557	-0.684136	1.52691	2.74844	7.40085	2538.31	1.16684	2958.24	1.31193	15	7	55	257	28.0329	19.6224	72451.6	1.43323	342.269	462.629	3.08586	4.43159	11.6337	12.7487	14.0286	16.4452	3.41539	1.00727	3.01453	2.99273	1.3132
111	6.76433	21498.9	3.72672	-0.688365	1.50611	2.70597	7.53522	2630.78	1.17182	3063.69	1.30941	11	6	56	230	30.5072	20.9871	70203	1.45003	346.664	471.868	3.04205	4.72826	12.2629	13.8133	15.3786	17.0108	3.41321	1.00727	3.01453	2.99273	1.3132
112	6.58139	22282.6	3.69295	-0.721141	1.59806	2.73823	7.47618	2760.03	1.18352	3104.57	1.3105	12	6	55	253	27.3119	19.1659	70359.5	1.42911	341.755	465.357	3.05183	4.37479	11.7547	13.4172	14.9009	16.2471	3.40739	1.00727	3.01453	2.99273	1.3132
113	7.28576	22173	3.78627	-0.715646	1.75826	2.73389	7.6563	2880.79	1.18607	3171.73	1.29835	12	6	55	239	27.5871	19.2227	70253.9	1.44	356	476.406	3.07264	4.39352	11.9618	13.3293	14.9638	15.673	3.40945	1.00727	3.01453	2.99273	1.3132
114	7.61157	23988.3	3.82383	-0.730201	1.84362	2.67064	7.67756	2866.4	1.19909	3268.64	1.28298	12	6	54	229	26.613	18.7305	72078.9	1.42	365.225	480.252	3.05619	5.75952	13.8531	15.3097	17.1479	17.6909	3.38723	1.00727	3.01453	2.99273	1.3132
115	7.84078	23040	3.78203	-0.674022	1.78508	2.67654	7.56592	2836.16	1.21177	3259.53	1.27326	19	9	54	228	27.7411	19.7039	73512.6	1.41053	357.786	474.447	3.05065	5.8933	11.5182	13.486	14.7502	15.6358	3.38173	1.00727	3.01453	2.99273	1.3132
116	7.07984	22527.2	3.77122	-0.683383	1.68309	2.70267	7.90772	2783.27	1.22759	3252.12	1.31561	11	5	55	185	28.6861	20.5706	71183.5	1.3818	353	481.045	3.03885	4.94143	10.9449	12.3318	13.7352	14.669	3.39243	1.00727	3.01453	2.99273	1.3132
117	7.54097	22485.3	3.78239	-0.687043	1.67076	2.65349	8.01561	2685.56	1.22536	3234.24	1.3264	10	5	54	168	31.8219	22.0379	70091.9	1.42462	348.545	486.342	2.9932	5.5718	11.1582	13.5242	14.4156	16.3501	3.41021	1.00727	3.01453	2.99273	1.3132
118	8.08382	23315.4	3.76213	-0.651408	1.63592	2.68768	7.81162	2645.82	1.20637	3060.49	1.31028	15	7	53	182	31.137	22.5306	73111.6	1.37447	344.176	478.144	3.05126	5.72179	10.9489	12.9035	14.1329	15.3184	3.38627	1.00727	3.01453	2.99273	1.3132
119	8.74897	23823.4	3.6413	-0.606522	1.03165	2.71115	7.46942	2250.4	1.20179	2709.25	1.34185	10	5	51	162	32.6525	23.9119	75226	1.37	291.07	450.669	3.05939	6.43768	11.8175	13.9862	15.3232	16.6326	3.41171	1.00727	3.01453	2.99273	1.3132
120	9.90798	26448.1	3.72339	-0.615	1.22782	2.65733	7.68967	2449.35	1.21969	2944.97	1.32562	10	5	55	276	32.273	23.113	75821	1.38726	310.198	467.493	3.05099	5.77504	11.5508	13.5436	14.7019	16.3068	3.41511	1.00727	3.01453	2.99273	1.3132
121	9.2901	27175.9	3.8434	-0.683095	1.83782	2.63467	7.92063	2795.99	1.22954	3254.89	1.29365	12	6	56	232	27.9968	20.0493	76557.5	1.4	359.223	484.53	3.06366	5.52812	11.2381	13.165	14.2198	15.5999	3.38181	1.00727	3.01453	2.99273	1.3132
122	10.2133	28189.9	3.87816	-0.684507	1.79795	2.61577	7.92535	2828.45	1.24369	3240.48	1.29137	13	6	55	283	26.4651	18.7186	75677.5	1.41927	361.352	482.727	3.04724	5.57201	10.6284	12.5177	13.5932	15.112	3.41344	1.00727	3.01453	2.99273	1.3132
123	10.4015	29191	3.85971	-0.702941	1.75265	2.65097	7.9017	2840.25	1.2604	3277.6	1.29027	15	7	57	310	24.018	18.1102	77287.4	1.31365	360.981	479.022	3.08444	5.94484	10.8785	12.4944	13.2805	15.2714	3.40626	1.00727	3.01453	2.99273	1.3132
124	9.64488	27925.5	3.83119	-0.719572	1.88838	2.62368	8.18791	3105.04	1.24863	3341.93	1.28742	15	7	57	278	24.4489	18.4126	75547.8	1.33	376.373	497.196	3.06466	6.45611	11.7717	13.1816	15.4858	15.8967	3.43379	1.00727	3.01453	2.99273	1.3132
125	9.08138	26359.8	3.78741	-0.70034	1.6465	2.68095	7.85658	2666.36	1.22983	3076.41	1.30369	13	5	55	223	28.6692	20.4812	79197.7	1.4	343.838	477.717	3.07371	5.9965	11.7967	13.6249	16.2616	21.8358	3.42527	1.00727	3.01453	2.99273	1.3132
126	10.8631	28415.7	3.8082	-0.706148	1.3791	2.63615	7.51844	2602.18	1.25679	3046.11	1.31866	11	5	54	184	32.2456	23.7416	74430.9	1.36	324.131	481.074	3.07877	8.32158	12.5655	15.268	17.0788	18.1882	3.42492	1.00727	3.01453	2.99273	1.3132
127	10.6519	28424.8	3.78911	-0.643854	1.23266	2.67973	7.80565	2436.81	1.2452	2922.44	1.32958	14	7	54	184	31.1807	22.4625	75465.7	1.40292	310.008	466.957	3.09174	7.93812	12.7435	15.3616	17.4432	18.2774	3.39405	1.00727	3.01453	2.99273	1.3132
128	9.8877	27028.5	3.78272	-0.653939	1.41397	2.6503	7.93788	2548.94	1.22267	3044.09	1.32353	12	5	55	194	29.5945	21.4097	72933.7	1.38	338.452	479.9	3.06199	7.84564	13.1767	15.9956	18.1719	18.8369	3.429	1.00727	3.01453	2.99273	1.3132
129	9.46849	28041.2	4.10855	-0.661247	2.25691	3.04878	7.87832	2795.09	1.18422	3213.97	1.27017	13	6	53	233	27.3393	20.1266	83202.3	1.36	382.843	475.301	3.41104	7.11159	11.2994	13.3442	15.1325	16.395	3.71788	1.00727	3.01453	2.99273	1.3132
130	10.3463	28510.5	4.11463	-0.70034	2.17721	2.99552	8.0591	2787.6	1.19509	3248.35	1.28193	13	6	54	247	27.1367	19.9689	84238.5	1.36	377.306	481.782	3.43751	6.64202	12.5786	13.3854	16.1651	17.0434	3.71727	1.00727	3.01453	2.99273	1.3132
131	10.787	28421.5	4.09562	-0.627222	1.91852	3.01417	7.77028	2691.14	1.20856	3119.58	1.28892	13	6	54	242	27.0325	19.8289	83726	1.36	356.347	463.375	3.44299	7.18115	11.3777	12.9786	15.1736	16.7961	3.74956	1.00727	3.01453	2.99273	1.3132
132	10.644	29325.9	4.08012	-0.618159	1.8559	3.02174	7.78005	2664.02	1.21637	3035.98	1.29033	14	6	54	280	25.5731	18.8816	86636.9	1.3555	351.512	461.343	3.43517	7.87152	10.566	13.2806	14.9277	16.1091	3.72416	1.00727	3.01453	2.99273	1.3132
133	10.6506	29638.3	4.17641	-0.678756	2.23368	3.00078	8.06736	2948.75	1.23592	3266.01	1.28297	14	6	55	274	26.7396	19.6246	85010.2	1.36	379	477.5	3.42225	8.53912	12.2931	14.1452	16.4427	17.0302	3.72223	1.00727	3.01453	2.99273	1.3132
134	11.6121	30476	4.16707	-0.673896	1.79036	2.94419	8.28206	2583.18	1.22171	3110.61	1.31576	11	5	53	200	32.4834	23.4698	87009.4	1.38565	358.88	485.904	3.47578	7.46383	12.345	13.8701	16.1916	16.8553	3.75171	1.00727	3.01453	2.99273	1.3132
135	11.3968	30665.3	4.19368	-0.674721	1.75429	2.90706	7.93221	2594.35	1.2499	2965.8	1.32377	12	5	55	214	30.4687	21.8242	87331.7	1.40052	342.632	467.635	3.40984	7.96423	10.0375	13.7789	15.1824	17.3109	3.75561	1.00727	3.01453	2.99273	1.3132
136	12.3417	33281.4	4.14967	-0.654667	1.48367	3.00467	7.172	2464.09	1.23617	2898.48	1.29741	13	6	55	251	27.3187	19.2011	91880.9	1.42082	323.74	451.354	3.47039	7.8659	10.5316	12.9035	15.5865	17.4113	3.75691	1.00727	3.01453	2.99273	1.3132
137	13.1387	34386.2	4.4122	-0.643051	1.95112	3.07598	7.90447	2523.27	1.24294	2974.01	1.3224	13	6	55	277	27.736	19.602	96045.9	1.41	351.123	459.561	3.74468	7.56484	12.8496	14.5641	16.3286	17.9685	3.94708	1.00727	3.01453	2.99273	1.3132
138	13.2096	34809.9	4.47742	-0.625623	1.9651	3.07713	7.83754	2481.28	1.20885	2927.1	1.31317	13	6	54	340	28.7519	20.4308	96344.4	1.41	352.525	459.56	3.72776	6.64593	10.7719	11.6712	14.4616	16.6708	3.94506	1.00727	3.01453	2.99273	1.3132
139	11.7548	32299.7	4.35	-0.62619	2.19365	2.81699	8.04286	2784.68	1.22475	3072.81	1.29319	14	6	52	286	26.2889	19.2124	94790	1.37	370.394	468.032	3.69076	6.65751	10.8377	13.8378	15.1527	16.8553	3.93871	1.00727	3.01453	2.99273	1.3132
140	8.94188	28452.5	4.31189	-0.644221	2.37195	3.22588	8.02588	2840.71	1.17828	3253.49	1.26591	19	8	53	351	25.7417	18.2673	88327.1	1.41	388.293	477.882	3.61961	8.64818	12.8257	14.919	17.5368	18.7075	3.91006	1.00727	3.01453	2.99273	1.3132
141	10.3924	29682.8	4.48862	-0.648011	2.61345	3.20824	7.76069	2929.89	1.18862	3350.89	1.25969	13	6	56	265	28.5639	20.2298	81262.1	1.41	417.02	471.407	3.57125	10.7017	11.4782	15.8873	17.3953	20.0117	3.94415	1.00727	3.01453	2.99273	1.3132
142	10.5409	29391.1	4.33885	-0.696403	2.39347	3.13412	8.19318	2799.26	1.199	3231.59	1.28693	16	7	53	265	29.0881	20.77	89888.2	1.40653	387	483.745	3.66738	6.84667	11.0151	14.3705	16.3107	17.6184	3.94586	1.00727	3.01453	2.99273	1.3132
143	10.8129	30153.5	4.46099	-0.706767	2.40557	3.10248	8.07926	2882.65	1.20462	3182.96	1.28339	14	6	52	296	30.2238	21.5455	88088.7	1.4	387	479.895	3.65679	8.96726	12.2307	14.9098	16.9162	18.1685	3.94295	1.00727	3.01453	2.99273	1.3132
144	11.353	31555.6	4.31295	-0.631627	1.76717	3.21766	7.51095	2384.66	1.18487	2800.02	1.28435	16	7	54	305	25.1624	17.9109	88707.1	1.40075	343.94	443.701	3.70678	11.1606	12.4675	15.3622	17.0581	19.1826	3.91035	1.00727	3.01453	2.99273	1.3132
145	11.3622	31188.5	4.43034	-0.678652	2.32291	3.16904	8.21641	2694.78	1.20372	3137.34	1.29028	12	5	49	263	29.9053	21.1693	84379.3	1.41	379.824	478.916	3.70185	9.35817	13.2934	16.249	18.3155	20.0481	3.91713	1.00727	3.01453	2.99273	1.3132
146	11.0562	31035.4	4.29968	-0.674434	2.18267	3.18	7.7728	2688.23	1.19132	3061.41	1.26145	16	7	50	281	26.1952	18.3704	88253.4	1.43301	374	463.277	3.6966	8.004	12.8578	14.8952	17.4656	18.5368	3.91563	1.00727	3.01453	2.99273	1.3132
147	11.5632	31537.9	4.38317	-0.660518	2.21424	3.13021	8.16123	2743.27	1.21418	3195.99	1.2892	11	7	54	295	26.7345	18.4492	87412.2	1.45	373.333	476.741	3.68663	10.7328	12.5185	14.8278	17.0924	18.7768	3.91252	1.00727	3.01453	2.99273	1.3132
148	11.9692	33187.6	4.38656	-0.676562	2.26969	3.10773	8.21418	2803.58	1.22235	3201.19	1.27689	10	6	52	319	25.0662	17.3423	89841.5	1.45	377.956	481.933	3.70292	12.5139	13.5591	15.8008	17.8965	19.3534	3.94839	1.00727	3.01453	2.99273	1.3132
149	11.8503	34052.5	4.36647	-0.719706	2.59587	3.06626	8.3415	3062.49	1.23274	3300.14	1.26166	11	7	54	327	25.2066	17.1214	93685.5	1.47447	400.08	490.964	3.71867	12.3093	12.9734	15.7525	17.2489	18.1965	3.92015	1.00727	3.01453	2.99273	1.3132
150	9.55283	31183.1	4.37893	-0.691011	2.54664	3.17285	7.74242	2928.3	1.23572	3307.66	1.25592	18	12	49	355	24.2079	17.0701	93039.3	1.42935	396.738	482.51	3.67035	10.5355	12.4807	14.8489	16.7636	16.4662	3.91674	1.00727	3.01453	2.99273	1.3132
151	11.9995	34058.3	4.42411	-0.717021	2.40614	3.11082	8.04894	2801.81	1.211	3224.39	1.29611	9	6	54	319	28.7041	19.8515	95987.3	1.45	387.886	495.953	3.71298	9.72167	12.5741	14.3555	16.6485	14.4938	3.94598	1.00727	3.01453	2.99273	1.3132
152	12.2789	35612.6	4.39033	-0.675333	1.77033	3.08956	8.1706	2483.03	1.22979	2983.15	1.30294	9	6	55	294	28.5082	20.1102	94767.7	1.42	342.91	475.659	3.81006	10.1351	12.3141	14.4967	16.7834	17.4739	3.94886	1.00727	3.01453	2.99273	1.3132
153	11.4353	33763.7	4.34634	-0.657184	1.62021	3.16954	7.98879	2381.36	1.22678	2819.33	1.31969	9	6	55	274	28.5236	19.6851	91051.4	1.45	334	460.638	3.74718	9.97575	12.4645	14.4578	16.564	17.276	3.91693	1.00727	3.01453	2.99273	1.3132
154	9.68517	30633.3	4.48882	-0.757188	2.66474	3.04868	8.70974	2791.44	1.19549	3249.07	1.28211	13	9	54	315	28.2234	19.3024	93075.1	1.47011	396.134	509.468	3.67547	8.93059	11.9439	13.7761	15.8848	14.9562	3.91252	1.00727	3.01453	2.99273	1.3132
155	9.09518	29670.2	4.51345	-0.76844	2.91111	3.12807	8.74474	3159.98	1.18231	3379.45	1.2596	10	7	53	263	27.5117	19.3477	85599.6	1.41191	423.158	514.874	3.6238	9.20508	11.3825	13.4918	14.9431	15.8824	3.94473	1.00727	3.01453	2.99273	1.3132
156	7.79381	28542.2	4.46033	-0.752333	2.911	3.11978	8.90055	3234.95	1.17899	3470.33	1.26571	13	8	52	270	27.6832	18.903	79846.4	1.46091	432.423	523.297	3.60006	11.3538	11.9253	13.4181	15.908	17.3991	3.93982	1.00727	3.01453	2.99273	1.3132
157	8.87998	29798.2	4.3331	-0.685185	2.30172	3.20114	8.36923	2796.97	1.19242	3198.92	1.27771	9	6	54	288	27.8097	19.1071	81938.2	1.45807	387	488.57	3.64082	12.1342	13.1804	16.371	17.666	18.8154	3.91153	1.00727	3.01453	2.99273	1.3132
158	10.4302	31565.4	4.46905	-0.761565	2.9916	3.12857	8.94062	3222.48	1.19809	3421.31	1.25354	9	6	53	297	27.0941	18.6218	87566.5	1.45	426.331	519.146	3.65895	10.7229	13.0754	15.5773	17.0234	18.0598	3.91121	1.00727	3.01453	2.99273	1.3132
159	11.0636	31404.1	4.49208	-0.7072	2.11782	3.10627	8.6769	2645.43	1.20977	3064.26	1.31302	8	5	50	241	31.4317	22.3343	89447.3	1.41	367.832	496.188	3.68896	8.53779	10.091	13.3167	13.867	15.972	3.89915	1.00727	3.01453	2.99273	1.3132
160	11.0022	32143.3	4.49288	-0.631068	2.00065	3.15113	8.45275	2576.96	1.21722	3030.5	1.30321	8	5	53	254	30.5625	21.4861	90437.9	1.42	357.039	482.337	3.70628	6.2538	9.88293	12.3347	13.8461	15.1616	3.90779	1.00727	3.01453	2.99273	1.3132
161	11.4635	33196.1	4.52794	-0.667059	2.22794	3.15235	8.72441	2730.06	1.22352	3128.96	1.29424	9	6	55	263	29.4941	20.7468	92297.3	1.42571	375.106	496.574	3.70394	6.68121	10.8254	12.9889	14.6912	15.5145	3.95177	1.00727	3.01453	2.99273	1.3132
162	12.1233	34276.7	4.40035	-0.682699	1.79229	3.14914	8.12143	2435.05	1.23291	2879.48	1.30544	9	6	55	285	28.3757	19.8037	95072.5	1.43	343.02	465.02	3.77785	6.68536	10.4126	13.24	14.959	15.4556	3.91405	1.00727	3.01453	2.99273	1.3132
163	11.9215	33152	4.44721	-0.634356	2.01338	3.11104	8.58098	2586.36	1.20872	3074.37	1.2947	9	6	56	279	29.8193	20.6061	93767.4	1.45509	360.862	488.064	3.76519	6.67776	8.8253	11.9825	13.2666	14.2139	3.913	1.00727	3.01453	2.99273	1.3132
164	10.401	32469.8	4.51304	-0.750167	2.90854	3.08237	9.13691	3132.61	1.22951	3399.3	1.27456	9	6	54	285	27.0275	18.616	90571	1.45	401.542	520.099	3.66565	8.73574	10.3688	13.2856	14.1363	15.4052	3.90768	1.00727	3.01453	2.99273	1.3132
165	8.98028	30872.6	4.54409	-0.754952	2.66198	3.25383	8.99921	3077.69	1.22455	3335.63	1.28812	10	7	54	330	26.3644	18.1074	90089.8	1.46	409.735	508.496	3.7299	10.2885	11.4179	14.4714	14.8166	16.8369	3.91401	1.00727	3.01453	2.99273	1.3132
166	7.67653	29482.5	4.58262	-0.775082	2.7082	3.29649	9.03892	3099.62	1.20738	3362.72	1.29805	9	6	51	334	26.3405	18.1705	89186.6	1.45	419.573	509.797	3.76077	9.78794	10.117	13.6673	13.1213	16.1921	4.01264	1.00727	3.01453	2.99273	1.3132
167	8.30959	29104.4	4.5837	-0.739812	2.71473	3.06144	8.97416	3099.72	1.2157	3387.04	1.27934	9	6	56	340	27.3408	18.6522	89204.6	1.46348	411.204	507.615	3.7619	9.14464	12.2404	14.607	14.7368	16.9916	4.01669	1.00727	3.01453	2.99273	1.3132
168	9.29649	32206	4.77936	-0.7	2.88826	3.45865	9.18622	3130.91	1.23341	3380.18	1.29032	10	15	51	282	27.3029	18.3938	93297	1.48	416.206	508.551	3.95683	9.87925	11.4746	14.0034	16.03	16.4292	4.25476	1.00727	3.01453	2.99273	1.3132
169	10.6125	33065.6	4.74098	-0.649153	2.41356	3.06434	8.96542	2659.06	1.21477	3071.72	1.33548	7	5	53	209	32.0624	22.0532	91096.7	1.45	381.095	496.512	4.00112	8.96064	10.5085	14.1666	12.8526	17.5702	4.24967	1.00727	3.01453	2.99273	1.3132
170	9.4375	33463.7	4.75236	-0.658369	2.29645	3.40709	8.60815	2556.34	1.19384	2992.02	1.41349	7	5	54	235	33.8348	23.4535	90576.9	1.45486	372.968	502.461	3.95646	7.91867	10.5128	14.2787	15.7777	16.8244	4.2503	1.00727	3.01453	2.99273	1.3132
171	11.7182	34861.9	4.8164	-0.636022	2.34365	3.5828	8.05941	2603.87	1.19827	3003.55	1.25037	17	9	55	312	27.1484	18.8392	107602	1.44005	379.371	456.836	4.20321	7.69587	10.5932	13.6358	15.7612	15.5206	4.335	1.00727	3.01453	2.99273	1.3132
172	13.742	37499.5	4.74719	-0.648229	2.22888	3.42725	8.38447	2541.48	1.20663	2927.03	1.29147	9	6	55	288	27.4801	18.9815	110497	1.45	369.046	469.049	4.18078	8.09772	10.5568	14.6094	15.7845	16.6124	4.33183	1.00727	3.01453	2.99273	1.3132
173	10.1093	33902.9	5.32684	-0.8	3.42566	3.41484	9.17762	3167.3	1.22024	3404.73	1.263	11	7	54	320	24.6499	17.053	101979	1.44032	455.8	512.672	4.15003	7.36423	11.01	14.3999	15.7372	16.1293	4.28499	1.00727	3.01453	2.99273	1.3132
174	9.21084	33735.1	4.93939	-0.806667	3.5425	3.53025	9.228	3159.09	1.21232	3397.92	1.26678	15	6	56	297	25.0223	17.2902	98959.3	1.45	446.285	511.765	4.03919	8.03309	11.4948	14.9436	16.232	16.8278	4.28388	1.00727	3.01453	2.99273	1.3132
175	7.76962	29795.6	4.6709	-0.637231	2.35169	3.64154	8.99415	2579.31	1.14258	2942.87	1.39453	12	5	54	256	31.6809	21.5671	93645.8	1.4728	383.505	497.074	4.06674	3.53867	9.40293	11.8476	13.8637	14.2069	4.40484	1.00727	3.01453	2.99273	1.3132
176	8.86753	30099	4.72331	-0.632198	2.35201	3.6161	8.62198	2560.82	1.16397	2947.95	1.37964	13	6	55	231	30.7957	21.5226	93330.4	1.43319	379.341	481.814	4.0774	7.63069	11.74	14.5578	16.6685	17.2598	4.35737	1.00727	3.01453	2.99273	1.3132
177	9.16667	32071	4.64665	-0.671053	2.21022	3.64632	8.10737	2517.65	1.16008	2912	1.27232	36	15	55	317	26.5311	18.22	100970	1.45755	374.201	459.55	4.04886	7.93046	11.395	14.6376	16.4203	16.1973	4.40037	1.00727	3.01453	2.99273	1.3132
178	9.7491	32232	4.78604	-0.677597	2.30844	3.66364	8.41818	2498.66	1.17264	2895.93	1.29024	14	6	54	266	26.1658	18.1781	99664.2	1.43932	374.718	469.85	4.13323	9.55348	12.0886	15.6417	17.156	19.192	4.39773	1.00727	3.01453	2.99273	1.3132
179	7.32105	29897.1	4.98371	-0.794569	3.13227	3.65605	9.23368	3132.31	1.18171	3377.88	1.26793	13	6	53	261	26.41	17.8853	93778.1	1.47997	432.387	513.713	4.14226	9.08474	12.7694	16.403	17.6403	19.7163	4.43125	1.00727	3.01453	2.99273	1.3132
180	7.55257	30607.4	4.88426	-0.778361	3.10361	3.68649	9.12703	3167.23	1.18317	3392.1	1.27153	13	6	55	281	26.7641	18.3246	93794.8	1.46	431.78	506.119	4.10053	9.3052	12.9152	16.494	17.5842	20.0521	4.43497	1.00727	3.01453	2.99273	1.3132
181	8.4208	32851.4	5.04845	-0.75945	3.4189	3.65881	9.4875	3298.91	1.19965	3446.51	1.25179	12	6	54	236	27.571	18.7906	92872.4	1.46979	463.119	521.974	4.14215	9.18473	13.0599	16.0902	16.02	19.4957	4.43025	1.00727	3.01453	2.99273	1.3132
182	10.1415	35551.2	5.23763	-0.811111	3.54731	3.54556	9.45858	3244.04	1.22238	3441.38	1.2487	12	5	52	229	27.3746	18.9757	96086	1.44	446.817	521.663	4.15599	11.0971	12.7734	16.6798	16.6004	20.5553	4.43339	1.00727	3.01453	2.99273	1.3132
183	10.105	36332.9	5.21979	-0.797917	3.45069	3.49828	9.66103	3201	1.22668	3422.43	1.27156	12	5	53	241	27.8052	19.0751	97415.7	1.45	456.418	528.201	4.17559	10.1199	12.9591	16.5275	16.5625	20.5746	4.41216	1.00727	3.01453	2.99273	1.3132
184	10.7928	35920.4	4.88247	-0.647026	2.66459	3.61133	8.61218	2672.66	1.18922	3049.56	1.26441	16	7	55	227	28.1589	19.6598	106415	1.43	395.286	479.042	4.10461	8.06877	11.4936	15.1642	15.6962	20.1991	4.45307	1.00727	3.01453	2.99273	1.3132
185	10.6547	35083.6	4.96735	-0.667787	2.73277	3.58291	8.92017	2605.01	1.17974	3046.31	1.27973	12	5	57	244	28.0218	19.509	104400	1.44	401.978	492.359	4.25897	6.1452	10.3473	14.9599	15.6067	20.2962	4.44965	1.00727	3.01453	2.99273	1.3132
186	13.1051	37975.3	4.95448	-0.659385	2.52677	3.42646	8.76308	2596.91	1.19481	2994.76	1.26549	11	5	54	221	29.828	20.6726	103696	1.44	386.834	488.852	4.18619	6.35842	11.4341	15.379	16.9304	19.7646	4.41224	1.00727	3.01453	2.99273	1.3132
187	13.0131	39131.9	5.08	-0.750492	2.49016	3.55447	8.03279	2548.07	1.21497	3061.53	1.25327	17	7	56	236	26.0092	17.8615	105207	1.47005	384.387	482.802	4.29563	5.52898	11.4779	13.6039	17.4682	19.3683	4.45073	1.00727	3.01453	2.99273	1.3132
188	7.16069	31596.3	5.08095	-0.803274	3.4506	3.64496	9.51155	3260.16	1.19178	3448.74	1.25527	29	12	52	273	23.4639	15.8133	95295.2	1.49084	461.801	522.993	4.1833	8.47693	13.5343	17.2617	19.9209	21.258	4.44567	1.00727	3.01453	2.99273	1.3132
189	8.26375	32393.7	5.00514	-0.779456	3.17069	3.69451	9.31222	3162.87	1.19667	3405.47	1.25305	13	6	55	284	25.1234	16.8354	96122	1.49	432.387	509.83	4.17048	8.89143	12.731	17.2111	20.3608	20.7822	4.41315	1.00727	3.01453	2.99273	1.3132
190	9.35483	32201.9	5.10515	-0.782818	3.37698	3.6608	9.48977	3234.17	1.20984	3457.43	1.2456	12	5	53	249	27.3315	18.4989	100184	1.48	454.185	519.98	4.1784	8.56289	11.5818	15.6926	16.4247	19.514	4.41194	1.00727	3.01453	2.99273	1.3132
191	7.76995	33033.6	5.17106	-0.76881	3.40289	3.64271	9.64218	3216.63	1.21915	3450.04	1.26168	13	6	56	280	26.5202	17.892	95782.5	1.48	439.614	522.594	4.15312	9.25643	13.7063	16.8954	19.4512	20.2698	4.41394	1.00727	3.01453	2.99273	1.3132
192	10.9163	34385.3	5.02649	-0.690066	2.66291	3.70574	8.93306	2677.46	1.21799	3098.21	1.26065	12	5	55	259	27.2719	18.9451	103645	1.44	400.415	485.175	4.24512	7.06076	12.569	15.6854	18.2161	19.2745	4.41361	1.00727	3.01453	2.99273	1.3132
193	11.4575	34510.3	5.15748	-0.689116	2.74592	3.69496	9.22913	2651.85	1.20411	3116.95	1.27104	12	5	54	276	27.9325	19.1429	104395	1.46014	406.538	495.118	4.22369	6.40273	10.8066	13.3738	15.6475	16.7103	4.41585	1.00727	3.01453	2.99273	1.3132
194	11.2728	33598.1	4.93344	-0.734114	2.84147	3.59282	9.25249	2840.26	1.21081	3256.14	1.25061	15	7	54	284	26.389	18.1727	101776	1.45	419.298	505.119	4.16067	5.49645	10.4318	13.3871	15.6197	16.2566	4.41703	1.00727	3.01453	2.99273	1.3132
195	11.4329	34204.4	5.00679	-0.709434	2.80604	3.5676	9.11246	2797.1	1.19572	3246.16	1.23933	11	5	54	237	29.5084	20.3826	99535.8	1.45	412.283	501.794	4.14056	6.27305	10.9689	13.774	16.3793	16.699	4.46074	1.00727	3.01453	2.99273	1.3132
206	13.1238	36234.4	5.33737	-0.783165	3.29966	3.72889	9.36417	3169.85	1.2108	3407.52	1.21788	15	6	56	269	27.2172	18.7422	108005	1.45475	435.687	510.403	4.40897	8.05323	12.2783	15.493	17.0679	17.9603	4.64217	1	1	3.14245	0.0509793
207	10.6879	34546.6	5.24706	-0.800619	3.29659	3.78772	9.76803	3163.21	1.20916	3395.61	1.23902	14	6	56	298	25.391	17.1923	103987	1.48	448.517	520.225	4.38841	8.36023	12.7671	15.8953	17.403	18.7077	4.63724	1	1	3.14245	0.0509793
208	9.66387	34237.3	5.33754	-0.794386	3.37754	3.84509	9.90087	3129.69	1.18182	3404.18	1.25155	12	5	55	279	27.6908	18.7405	102046	1.48	439.13	527.28	4.41078	8.31665	12.6267	15.5963	17.2692	17.8202	4.61357	1	1	3.14245	0.0509793
209	10.4245	34533.2	5.30898	-0.808978	3.57926	3.86327	9.76582	3264.66	1.19915	3460.85	1.2298	13	6	56	322	25.8156	17.7296	105026	1.46	454.975	522.946	4.42399	8.46075	12.4287	15.588	17.1794	17.9921	4.68112	1	1	3.14245	0.0509793
210	10.0377	35516.2	5.3746	-0.759164	3.609	3.85889	9.91618	3239.88	1.19171	3435.08	1.23293	13	6	56	276	26.6997	18.4316	104378	1.45	466.658	529.273	4.40464	9.26456	11.8615	14.7774	16.0491	16.6947	4.67602	1	1	3.14245	0.0509793
211	11.779	36056.9	5.09441	-0.743421	3.08651	3.78618	8.79934	2998.86	1.21652	3384.15	1.22014	15	6	55	276	26.8401	18.3623	105472	1.46	425.641	503.892	4.33316	8.30129	11.9573	15.062	16.3227	17.599	4.67854	1	1	3.14245	0.0509793
212	13.5001	38701.4	5.31908	-0.743816	3.32915	3.83411	9.38367	2896.83	1.20345	3288.82	1.23171	15	7	55	297	27.8003	19.0749	111152	1.45834	432.012	507.061	4.54303	7.13845	11.0942	14.2342	15.4344	16.3257	4.6887	1	1	3.14245	0.0509793
213	12.1634	38737.8	5.22941	-0.747059	3.20056	3.76952	9.18614	3085.99	1.20006	3336.25	1.20914	16	7	56	349	22.0788	15.2531	108146	1.45	439.021	501.774	4.4856	6.85947	12.3493	14.9338	16.5646	17.0469	4.64831	1	1	3.14245	0.0509793
214	12.1192	38071.9	5.13772	-0.781495	3.2516	3.64516	10.0378	3051.26	1.20228	3429.6	1.23586	11	5	55	262	28.2501	19.5091	105984	1.45	444.575	539.724	4.46848	7.38079	12.2421	15.1222	16.4409	17.5747	4.68502	1	1	3.14245	0.0509793
215	12.6097	37647.6	5.3367	-0.69697	3.07407	3.7375	9.76278	2790.35	1.19043	3202.44	1.25378	12	5	54	257	26.8244	18.5839	104292	1.44	420.037	522.053	4.50615	8.23056	12.6499	14.6369	16.9865	17.6682	4.62973	1	1	3.14245	0.0509793
216	10.1322	35022.5	5.44927	-0.777551	3.82507	3.90697	9.78702	3319.1	1.18378	3456.26	1.21376	23	10	54	343	24.5288	16.6332	106070	1.48276	478.091	528.5	4.54617	8.26878	11.862	14.8478	16.3373	17.6556	4.76101	1	1	3.14245	0.0509793
217	8.63515	32248.9	5.23077	-0.795833	3.60577	3.91905	10.0011	3314.51	1.15974	3484.03	1.22367	13	6	56	294	26.8516	18.4011	100065	1.46272	472.585	538.508	4.48901	8.64306	12.4083	15.2421	16.9601	18.1071	4.69745	1	1	3.14245	0.0509793
218	10.7335	34125.5	5.299	-0.778333	3.474	3.86061	9.53113	3208.67	1.17728	3453.36	1.21527	13	6	54	272	26.7691	18.0785	104552	1.48	450.463	520.165	4.47497	7.32156	12.1964	15.3276	17.3014	18.5435	4.6983	1	1	3.14245	0.0509793
219	11.83	35627.2	5.20517	-0.732103	3.18359	3.81216	9.6772	2852.31	1.16283	3237.44	1.24051	11	5	54	301	28.645	19.6125	101913	1.46	429.523	519.447	4.47686	7.22405	12.2162	14.8086	16.9192	17.7525	4.69712	1	1	3.14245	0.0509793
221	11.1559	36314.2	5.465	-0.658529	2.99714	3.91147	9.93441	2687.81	1.17931	3126.64	1.35964	13	6	56	236	28.8906	20.0694	106193	1.44	413.611	521.1	4.55601	5.93772	10.8631	14.7719	16.9896	17.304	4.68656	1	1	3.14245	0.0509793
223	11.1068	34568.4	5.26949	-0.807458	4.20168	3.90476	10.0577	3376.27	1.16331	3492.15	1.19745	12	5	54	251	27.9403	19.3868	102212	1.44	485.515	545.171	4.48453	6.74076	13.1935	15.7038	17.6997	17.8978	4.72095	1	1	3.14245	0.0509793
224	11.536	37087.8	5.51495	-0.770764	3.5196	3.79534	10.106	3006.76	1.1872	3374.78	1.25832	12	5	55	265	26.7438	18.4227	106374	1.45	449.302	534.6	4.55947	7.40798	11.351	14.3322	15.5983	17.7866	4.72868	1	1	3.14245	0.0509793
225	11.6321	38960.6	5.50028	-0.806534	4.45152	3.83232	9.91358	3432.66	1.20843	3498.65	1.19137	16	7	48	335	22.9396	15.6539	107458	1.46623	489.253	534.356	4.5587	6.11273	11.4471	14.9479	16.007	19.0096	4.72656	1	1	3.14245	0.0509793
226	13.4894	40641.7	5.50241	-0.80512	3.76717	3.69653	9.83201	3319.32	1.22196	3461.6	1.21076	15	6	55	287	23.897	16.434	109801	1.46	460.506	530.677	4.52415	7.71542	12.6556	15.0384	17.2627	18.4929	4.73181	1	1	3.14245	0.0509793
228	13.2852	40251.3	5.49383	-0.795988	3.93486	3.70865	10.2127	3266.39	1.20679	3442.04	1.2225	13	6	56	293	25.6501	17.3964	110603	1.47896	466.562	542.519	4.57897	7.26396	12.8958	14.8183	17.7576	18.2745	4.72407	1	1	3.14245	0.0509793
229	12.4085	37976.7	5.63696	-0.746535	3.26931	3.84196	9.94196	2790.98	1.20105	3231.35	1.26102	13	5	55	275	27.0281	18.445	107582	1.46384	431.937	522.052	4.57996	6.21941	11.8307	14.5683	17.5853	18.2863	4.68393	1	1	3.14245	0.0509793
230	11.6396	38789.9	5.48715	-0.765296	3.29023	3.47792	9.33588	3128.31	1.21281	3298.19	1.20353	18	7	55	330	21.8679	14.7866	109792	1.48	433.769	516.675	4.69156	5.47481	12.0015	14.3308	17.9217	18.22	4.68069	1	1	3.14245	0.0509793
231	10.1078	35613.1	5.40419	-0.808683	3.45868	3.79062	9.70719	3229.28	1.22008	3419.69	1.24009	16	7	55	293	23.4931	15.8773	101210	1.48815	457.151	534.575	4.5201	6.32444	13.6199	15.8857	19.2698	19.3248	4.72828	1	1	3.14245	0.0509793
232	10.3468	35797.4	5.49422	-0.793353	3.66994	3.83222	10.0926	3243.2	1.19361	3423.31	1.21847	16	6	56	296	23.9795	16.4986	100984	1.46117	455.98	539.885	4.5007	7.8804	13.3562	15.8488	17.4385	18.9738	4.72967	1	1	3.14245	0.0509793
233	9.25638	35256	5.38504	-0.799413	3.92199	3.93462	10.1869	3373.16	1.19463	3485.6	1.21145	15	6	55	302	23.7501	16.2966	98502.1	1.46322	479.993	542.533	4.51321	9.78859	14.4095	18.5929	19.8301	22.1527	4.69403	1	1	3.14245	0.0509793
234	10.9847	34928.9	5.17113	-0.801761	3.52442	3.76686	10.3619	3193.9	1.18383	3433.48	1.23739	12	5	57	233	28.4637	19.5488	104927	1.45802	450.453	548.23	4.47505	8.35291	13.7014	17.0402	19.0369	20.144	4.71861	1	1	3.14245	0.0509793
236	14.1993	40214.9	5.39875	-0.811875	3.60812	3.5817	10.209	3246.72	1.20963	3462.73	1.21734	14	6	58	281	25.2946	17.3835	111029	1.45876	459	545.649	4.50992	5.27066	12.6251	14.5118	15.9744	16.4304	4.69123	1	1	3.14245	0.0509793
237	14.6132	42568.1	5.45853	-0.810368	4.11488	3.65537	10.5	3342.97	1.20165	3464.8	1.20971	13	5	56	261	26.9669	18.9036	113783	1.43022	474.317	555.945	4.6296	6.06505	11.8703	15.0552	16.2458	17.2057	4.7252	1	1	3.14245	0.0509793
238	14.0538	40567.9	5.55611	-0.812222	4.1039	3.80298	10.1573	3300.09	1.21745	3444.3	1.21478	15	6	56	290	23.0005	15.5839	113040	1.47175	468.839	538.122	4.68898	6.83564	12.3898	15.2779	16.9857	16.847	4.72813	1	1	3.14245	0.0509793
240	11.3281	36870.7	5.58206	-0.784385	4.50849	3.89808	10.3992	3398.65	1.21456	3493.17	1.20431	14	6	55	279	26.3036	18.0197	107174	1.46184	486.805	546.74	4.56087	7.54291	12.4836	15.0601	15.3809	17.1127	4.73713	1	1	3.14245	0.0509793
242	12.818	38944.6	5.64906	-0.651572	4.08962	3.81974	10.5592	3409.57	1.2454	3492.41	1.22836	15	7	55	268	25.3527	17.3431	108738	1.46592	465.676	546.34	4.67052	9.55886	12.4513	15.4438	16.6722	17.1527	4.74945	1	1	3.14245	0.0509793
243	12.6987	39565.7	5.57015	-0.640615	4.45025	3.83122	10.5409	3370.07	1.224	3475.56	1.21942	19	8	57	282	25.1934	17.1896	108453	1.47525	479.076	551.185	4.65313	9.7987	14.6005	16.9678	18.5321	18.9093	4.78255	1	1	3.14245	0.0509793
244	12.5211	37852.7	5.4204	-0.606689	3.51846	3.93306	10.3807	3018.44	1.21636	3329.45	1.23494	13	6	55	251	27.4705	18.6333	109473	1.47011	436.08	533.27	4.63157	8.13337	12.6846	15.718	17.0481	17.9345	4.75707	1	1	3.14245	0.0509793
245	12.1508	37496.9	5.59026	-0.62987	3.89866	3.85856	10.2751	3140.21	1.22859	3401.71	1.23147	13	6	54	293	25.4917	17.5687	106137	1.45	453.155	533.479	4.57739	7.71283	12.9738	15.0299	16.8432	17.071	4.78901	1	1	3.14245	0.0509793
246	10.7937	36237.1	5.46995	-0.654521	3.89825	3.85636	10.2202	3186.3	1.21851	3373.22	1.22212	16	8	54	347	21.8496	18.1996	100953	1.2	454.772	534.434	4.52944	7.47256	13.1705	15.444	17.1017	17.1868	4.75353	1	1	3.14245	0.0509793
247	10.8482	35746.2	5.52547	-0.647425	3.61382	3.88635	10.0329	3151.85	1.21861	3372.87	1.21383	15	8	55	320	22.0304	18.3273	102347	1.2	451	527.076	4.50882	7.75914	13.0165	14.9265	16.858	17.4275	4.78854	1	1	3.14245	0.0509793
248	13.1221	37128.3	5.50109	-0.64212	3.49701	3.94417	9.72735	3016.3	1.23398	3363.97	1.20716	18	8	56	312	22.1018	18.3915	106748	1.2	436.261	511.993	4.65083	8.4634	13.7317	15.5238	17.6363	18.1919	4.75899	1	1	3.14245	0.0509793
249	10.3551	34444.4	5.39916	-0.677809	4.0927	3.94977	10.4803	3404.76	1.21167	3497.61	1.20458	19	9	55	298	22.3843	18.5019	105565	1.20916	485.977	545.088	4.56554	8.9048	13.8997	15.9093	17.7828	18.7503	4.75358	1	1	3.14245	0.0509793
250	10.1233	34182	5.42533	-0.636554	4.15561	3.93699	10.6224	3396.92	1.21893	3490.65	1.20666	18	9	56	330	21.6032	17.7867	105006	1.21211	484.344	549.32	4.60499	9.45637	15.5124	16.7823	19.2146	19.6015	4.78842	1	1	3.14245	0.0509793
251	10.0184	33572.4	5.55844	-0.634853	4.31233	4.06195	10.5011	3393.79	1.22262	3497.75	1.20541	17	8	56	299	22.2777	17.8788	112757	1.25	476.166	542.208	4.70413	9.9005	14.506	16.9964	18.3622	20.0571	4.92553	1	1	3.14245	0.0509793
252	11.4126	37182.6	5.54435	-0.625269	3.73978	4.09889	10.0339	3166.12	1.22024	3377.37	1.20962	16	8	54	299	22.1572	18.6262	115262	1.19	457.386	518.441	4.67877	9.13049	15.6002	17.4287	19.5194	20.1598	4.92763	1	1	3.14245	0.0509793
253	11.4734	36452	5.68588	-0.678249	4.10699	4.031	10.1832	3152.99	1.22529	3398.5	1.21636	15	7	54	288	22.9296	18.5214	115476	1.24	459	525.466	4.66435	7.9227	13.5409	15.7896	17.5097	18.5106	4.92915	1	1	3.14245	0.0509793
254	9.45083	34163.4	5.57368	-0.63985	4.00579	4.09917	10.2093	3155.52	1.19138	3338.14	1.21956	17	8	54	323	20.3576	16.1347	108237	1.26	460	527.979	4.65809	8.0194	14.8943	17.1402	18.976	20.0594	4.89243	1	1	3.14245	0.0509793
255	9.29003	32503	5.51686	-0.637574	3.85503	4.13341	10.4322	3251.18	1.19415	3433.47	1.21352	14	7	56	258	23.7976	18.6751	101110	1.29173	471.902	540.241	4.65571	8.50546	15.6308	18.6402	20.2368	21.6191	4.8952	1	1	3.14245	0.0509793
256	9.48915	32231.3	5.60141	-0.669014	4.89281	4.11392	10.7775	3446.32	1.19799	3499.74	1.1945	16	8	57	297	23.2845	17.3601	105738	1.34747	490.825	555.22	4.64355	7.46961	13.5887	15.758	17.3134	17.9954	4.89469	1	1	3.14245	0.0509793
257	9.92474	33683.9	5.58448	-0.649713	4.15776	4.10735	10.7005	3362.51	1.21139	3490.23	1.20888	15	7	56	279	23.5083	17.4905	106276	1.35	482.481	547.175	4.67482	8.87743	14.115	16.9714	18.233	20.0397	4.889	1	1	3.14245	0.0509793
258	10.8835	35846.3	5.73394	-0.624848	4.33818	4.10775	10.6023	3348.12	1.21925	3486.02	1.2092	15	7	56	269	24.2243	17.926	107906	1.35	484.692	541.21	4.66928	9.94187	14.2633	16.5727	18.0897	19.5426	4.92202	1	1	3.14245	0.0509793
259	11.0086	35034.6	5.71369	-0.634395	4.48921	4.12947	10.6758	3291.21	1.21814	3470.12	1.21651	13	6	54	271	25.5624	18.6355	105566	1.37	479.613	542.011	4.65875	11.7137	14.5236	17.6779	18.5594	21.4292	4.88439	1	1	3.14245	0.0509793
260	12.076	37336.9	5.68291	-0.593987	3.8	4.07232	10.1339	3223.74	1.23872	3448.93	1.22539	13	6	55	251	25.8893	18.3841	109132	1.41859	463.749	537.319	4.72093	10.3546	14.3735	16.5273	18.0887	20.0845	4.91838	1	1	3.14245	0.0509793
261	11.4092	34637.4	5.81583	-0.615335	3.52843	4.04142	10.7628	3056.36	1.24871	3335.06	1.25407	17	8	55	234	26.49	19.2298	110781	1.3795	442.475	537.831	4.73791	8.81633	14.3117	16.2783	17.8342	19.4485	4.87984	1	1	3.14245	0.0509793
262	10.9077	33597.1	5.63116	-0.655822	3.98192	4.10508	10.8331	3157.22	1.23518	3401.41	1.24021	15	8	56	269	27.4805	19.9319	112479	1.37952	453.429	541.72	4.68797	9.05547	13.6392	16.4673	18.1293	18.8684	4.88847	1	1	3.14245	0.0509793
263	9.70359	34520.9	5.53447	-0.641615	4.0289	4.10205	10.6555	3179.1	1.22035	3436.99	1.2235	16	8	54	260	25.4898	18.7478	105904	1.36573	459.348	540.184	4.58714	8.79987	14.5884	17.0543	19.0614	20.1624	4.91963	1	1	3.14245	0.0509793
264	8.51483	30945.5	5.45	-0.638679	3.8	4.13005	10.7601	3246.34	1.20832	3435.67	1.23852	16	8	55	271	25.6837	18.5319	102522	1.38868	467.161	545.365	4.59361	11.3843	15.4073	18.794	19.5704	21.3861	4.88969	1	1	3.14245	0.0509793
265	9.64728	32647.2	5.60536	-0.664286	4.44613	4.114	10.7182	3441.22	1.23358	3500	1.20006	18	9	50	320	24.4607	18.1032	108594	1.35509	494.354	547.867	4.63912	7.55986	14.2718	15.4495	16.3671	17.8276	4.92319	1	1	3.14245	0.0509793
266	10.753	35042	5.58642	-0.701734	3.96994	4.1531	10.6002	3299.9	1.23838	3476.29	1.21668	16	8	53	328	23.824	16.9955	107497	1.4	459.694	535.264	4.66802	8.07092	14.0366	16.8011	17.7856	19.0738	4.88994	1	1	3.14245	0.0509793
267	10.9391	36280.6	5.7037	-0.629915	4.59906	4.16753	10.5421	3333.72	1.24028	3474.02	1.2104	17	8	51	322	22.9313	17.0264	108079	1.35	478.233	534.031	4.68826	9.46647	16.1602	18.9034	20.0674	21.5877	4.89245	1	1	3.14245	0.0509793
268	12.7779	36723.1	5.85449	-0.632508	4.74311	4.17449	10.8801	3345.36	1.22536	3487.54	1.21342	14	7	49	292	24.5181	18.1944	111140	1.35207	487.008	545.957	4.81281	8.90609	14.7642	17.2002	18.5569	19.5592	4.99786	1	1	3.14245	0.0509793
273	9.39652	32297.5	5.64411	-0.598479	4.06312	4.43836	10.5874	3266.13	1.15289	3450.14	1.19782	17	8	46	202	26.1006	19.0786	112923	1.36827	484.069	539.343	4.88506	9.75892	14.7707	16.3522	16.3791	17.2023	5.15574	1	1	3.14245	0.0509793
274	9.24373	31906.6	5.67122	-0.625872	4.29622	4.44724	10.599	3357.04	1.16623	3495.7	1.19514	15	7	54	288	23.1504	17.2276	115871	1.33297	492.271	539.46	4.90009	12.4097	13.7378	15.9361	15.0661	16.4632	5.1319	1	1	3.14245	0.0509793
275	9.63493	30927.5	5.67469	-0.633333	4.07037	4.44911	10.6934	3256.53	1.18342	3445.46	1.20454	14	7	55	220	25.4987	19.4977	114371	1.31891	467.741	536.069	4.90298	12.0782	13.3965	15.5296	14.7872	15.9026	5.1266	1	1	3.14245	0.0509793
281	11.1445	34689	5.83045	-0.672537	4.21522	4.34015	11.0764	3297.38	1.22935	3445.55	1.21939	14	7	56	256	22.1749	16.2863	117197	1.36	469.693	545.889	4.89485	8.70333	11.482	13.9257	12.9725	13.7278	5.11197	1	1	3.14245	0.0509793
282	10.9536	35769.6	5.79144	-0.682263	4.1737	4.30504	11.1453	3326.03	1.23828	3472.49	1.21668	15	7	56	234	24.7458	18.2469	113446	1.36	467.89	547.131	4.91752	8.50781	13.4545	14.9251	14.7721	14.9119	5.11127	1	1	3.14245	0.0509793
283	10.6338	35255	5.79231	-0.676	4.83096	4.34188	11.1799	3400.65	1.22916	3492.71	1.2114	14	7	55	233	24.5492	18.2287	112617	1.35063	493.429	550.853	4.90091	9.36507	13.2334	14.4607	13.721	14.855	5.11265	1	1	3.14245	0.0509793
284	10.5303	34679.4	5.80578	-0.651064	4.37629	4.4015	11.1469	3384.76	1.23845	3497.89	1.21174	14	7	56	220	24.3815	18.0133	114146	1.35	478.195	547.842	4.93752	9.43681	11.5846	13.8124	13.1033	14.1404	5.17164	1	1	3.14245	0.0509793
285	9.96536	35629.6	5.86705	-0.671676	4.32832	4.42792	11.1346	3348	1.24334	3480.39	1.21402	16	7	56	282	23.4212	17.3702	109675	1.35	475.087	543.327	4.94815	10.4645	12.7945	14.9804	14.2479	14.9456	5.16877	1	1	3.14245	0.0509793
286	11.1352	37050.4	5.86366	-0.622671	4.15062	4.39258	11.1729	3313.02	1.26182	3467.1	1.22424	17	8	55	237	24.7867	18.3284	115065	1.35	473.373	544.402	5.00145	11.7308	13.3824	15.841	15.0681	15.9801	5.24069	1	1	3.14245	0.0509793
289	9.00768	33303.2	5.74852	-0.66097	3.84283	4.5927	10.2202	3008.01	1.21084	3277.4	1.19737	21	9	54	271	17.8555	13.6457	133705	1.31	462.779	506.362	4.99065	8.39883	14.5591	17.8534	16.5862	18.0262	5.20989	1	1	3.14245	0.0509793
290	10.6245	35169.3	5.67648	-0.682627	3.72945	4.54003	10.0743	3022.63	1.24335	3290.61	1.19869	20	9	55	275	18.1397	13.9538	129834	1.3	456.65	497.089	5.00018	9.50621	15.4533	18.4376	17.634	18.3362	5.22423	1	1	3.14245	0.0509793
291	12.0278	38402.7	6.06235	-0.677647	4.72278	4.59968	10.2318	3280.31	1.25377	3427.24	1.19923	21	9	58	339	16.9921	13.1179	136370	1.29952	480.039	502.237	5.0802	8.1522	14.1761	17.8758	16.5714	18.0214	5.26393	1	1	3.14245	0.0509793
292	12.5341	40154.5	6.05	-0.679196	4.18199	4.58602	10.0195	3223.39	1.25986	3347.5	1.20402	24	10	56	406	14.9824	11.4546	143090	1.31	469.228	491.539	5.12484	9.4319	12.0791	18.2772	17.4383	18.2403	5.28624	1	1	3.14245	0.0509793
293	11.1156	37801	6.07672	-0.657173	4.08337	4.57586	10.0635	3002.22	1.2242	3227.79	1.19872	26	11	53	320	17.2889	13.2885	130375	1.29986	456.796	495.546	5.10725	8.42108	12.4218	18.2187	17.1453	19.1481	5.28715	1.26319	3.26319	3.7392	0.0167507
294	8.98455	35519.4	6.34813	-0.648457	4.53019	4.80015	9.99178	3096.59	1.23284	3236.19	1.18914	29	12	57	369	14.9596	11.5961	134004	1.29997	468.969	487.345	5.1959	6.62178	11.4797	16.9218	16.2018	17.1278	5.46824	1.26319	3.26319	3.7392	0.0167507
295	11.081	37341.4	6.02278	-0.563306	3.79052	4.85482	9.52874	2928.06	1.23375	3098.9	1.18783	22	9	56	357	16.5782	12.6583	134664	1.31	443	452.562	5.28594	8.58721	10.7369	16.4059	15.3845	16.6377	5.49204	1.26319	3.26319	3.7392	0.0167507
296	12.1142	38878.8	5.91079	-0.54946	3.61259	4.82849	9.33665	2809.99	1.21342	3002.25	1.18197	24	10	57	378	15.0966	11.5145	133757	1.31	434	455.872	5.31744	11.808	12.8858	17.1452	16.3373	17.5171	5.49156	1.26319	3.26319	3.7392	0.0167507
297	14.251	42083.4	6.04792	-0.572075	3.74717	4.7168	9.70513	2874.16	1.23724	3106.92	1.19089	22	9	54	370	15.6016	12.1347	134336	1.29306	438.811	474.198	5.37826	11.7857	14.7934	18.7713	18.1109	18.9888	5.49104	1.26319	3.26319	3.7392	0.0167507
298	11.5381	39297.2	6.17298	-0.569556	4.29859	4.79651	9.98153	3053.48	1.22107	3258.18	1.17552	29	12	52	357	17.6065	13.3589	151184	1.31729	474.687	490.062	5.3264	4.68306	11.0951	13.866	13.6205	13.8998	5.49768	1.26319	3.26319	3.7392	0.0167507
299	13.7563	41433.4	6.03564	-0.572364	3.812	4.76462	9.57091	2955.23	1.23213	3100	1.1844	23	10	56	420	15.0853	11.4798	139146	1.31106	445.375	469.307	5.31001	11.4348	11.9353	16.272	14.8765	16.8036	5.49353	1.26319	3.26319	3.7392	0.0167507
300	14.2	42561.2	6.04205	-0.569823	3.70979	4.85556	9.29854	2868.41	1.22826	3062.55	1.18407	27	11	56	401	13.4177	10.3212	144440	1.29907	439	452.274	5.3907	11.6188	13.3914	16.9523	16.0274	17.4257	5.49467	1.26319	3.26319	3.7392	0.0167507
301	8.63934	32838.8	5.79476	-0.587523	4.33592	4.89851	9.91416	3129.36	1.13162	3269.23	1.13979	26	11	55	373	15.9001	12.3212	147242	1.29	477.347	494.028	5.30283	10.9692	15.222	18.6933	17.6596	19.2092	5.49417	1.26319	3.26319	3.7392	0.0167507
302	8.95099	31735	5.79077	-0.611002	4.23418	4.91392	9.84029	3181.59	1.17748	3349.87	1.147	24	10	52	379	16.2107	12.4218	125722	1.30136	477.879	474.971	5.29942	12.2196	14.224	14.8041	16.1268	17.4279	5.50955	1.26319	3.26319	3.7392	0.0167507
303	11.1269	35359.1	5.85761	-0.569547	4.00556	4.90153	9.81017	3060.75	1.20539	3293.56	1.16474	21	9	58	364	14.0938	10.8202	136968	1.3	457.549	480.358	5.33353	12.4959	14.5328	16.7487	16.0861	16.7447	5.51037	1.26319	3.26319	3.7392	0.0167507
304	14.0361	39212.3	5.88225	-0.5935	3.89075	4.74124	10.281	3029.8	1.22827	3307.74	1.1894	23	10	57	304	19.8332	15.193	139702	1.3028	458.489	499.353	5.32831	12.9458	12.8536	16.2203	14.8228	16.9911	5.49575	1.26319	3.26319	3.7392	0.0167507
305	12.59	38217.6	5.94906	-0.586106	3.99005	4.80778	10.11	3171.13	1.24456	3300.44	1.18857	39	18	56	424	10.266	7.88302	146462	1.30429	454.353	489.888	5.32069	9.74678	13.2989	16.4568	15.3111	16.8169	5.50098	1.26319	3.26319	3.7392	0.0167507
307	12.8942	41300.8	6.17092	-0.608797	4.51221	4.93393	10.3564	3287.49	1.22199	3401.97	1.17193	25	11	58	422	15.0001	11.5187	143835	1.3	489.453	499.723	5.50712	12.1654	15.1932	17.4069	16.908	17.4321	5.6741	1.26319	3.26319	3.7392	0.0167507
308	12.9725	41386.6	6.0279	-0.605026	3.96014	4.87343	9.80929	3035.86	1.23254	3221.24	1.18001	25	12	53	392	15.0487	11.4713	149539	1.27775	456	467.454	5.47139	11.8248	15.4926	17.5231	16.6371	17.7251	5.67217	1.26319	3.26319	3.7392	0.0167507
309	12.2149	41745.5	6.13992	-0.580665	4.0842	4.86798	10.2666	2984.08	1.23577	3236.14	1.19056	23	11	52	326	12.6688	9.53617	147910	1.33	460.88	493.863	5.41354	13.4497	15.1941	17.3788	16.3605	17.5717	5.64952	1.26319	3.26319	3.7392	0.0167507
310	11.9804	41274.8	6.03499	-0.607648	4.0914	4.96893	9.90394	3083.46	1.24262	3309.55	1.17486	31	14	56	417	16.2221	12.4532	143498	1.30792	467.563	478.937	5.46206	13.2997	14.3558	17.4932	16.3856	17.35	5.68054	1.26319	3.26319	3.7392	0.0167507
311	11.4372	40554.3	6.04004	-0.603383	4.34981	4.84961	10.2184	3281.34	1.2332	3381.93	1.17232	30	13	55	430	15.7409	11.8437	143181	1.3318	481.081	498.705	5.46444	12.6193	13.7388	16.532	15.7555	16.217	5.67608	1.26319	3.26319	3.7392	0.0167507
312	11.6291	39622.5	6.09946	-0.618512	4.65517	4.79567	10.5453	3400.03	1.24923	3467.72	1.18102	34	15	58	413	14.6828	11.2025	137770	1.31574	484.428	510.51	5.48091	12.6113	11.2132	15.4024	14.2658	15.227	5.68153	1.26319	3.26319	3.7392	0.0167507
313	11.0887	41015.1	6.01313	-0.631487	4.18924	4.91421	10.0386	3277.34	1.26665	3350.43	1.19143	47	20	52	487	9.01994	6.91915	139426	1.30939	463.462	483.391	5.42853	11.3569	11.7285	15.4234	14.5952	15.1564	5.6679	1.26319	3.26319	3.7392	0.0167507
314	11.4638	38518.2	5.95794	-0.597664	3.98458	4.77799	10.0336	3089.64	1.21039	3201.75	1.16632	31	14	60	397	16.278	12.161	138437	1.36884	455.874	492	5.3746	11.0511	13.0435	15.85	16.1095	16.8357	5.51762	1.26319	3.26319	3.7392	0.0167507
315	13.2186	39943.8	5.86787	-0.5753	3.78513	4.67411	10.3595	3038.83	1.22225	3251.27	1.18168	28	12	57	313	20.217	15.4435	138848	1.30949	446.722	504.067	5.31016	10.7825	11.9421	16.8332	15.2892	17.1097	5.51274	1.26319	3.26319	3.7392	0.0167507
316	12.4079	40524.6	5.88851	-0.616383	3.88511	4.75228	10.2153	3017.27	1.22064	3260.23	1.17512	29	12	57	352	17.0551	12.9835	136110	1.31255	450.832	496.812	5.29107	10.8199	12.2202	17.3755	15.8875	16.9775	5.5217	1.26319	3.26319	3.7392	0.0167507
317	13.0569	38650.1	6.88184	-0.546036	4.8335	4.85591	10.0549	3076.64	1.22745	3237.41	1.1793	27	11	53	385	20.3272	15.3011	132665	1.36312	482.084	474.959	5.28872	10.3515	12.799	18.3025	16.7712	15.8956	5.57603	1.26319	3.26319	3.7392	0.0167507
318	9.29973	35199.6	6.49086	-0.583102	4.70637	4.89062	10.6128	3168.5	1.20464	3326.51	1.17294	24	11	53	294	19.4043	14.3764	126558	1.39966	493.616	511.913	5.25866	10.0808	14.8012	17.9378	16.0101	17.8845	5.52703	1.26319	3.26319	3.7392	0.0167507
319	7.96638	33449.6	5.90695	-0.538604	4.01889	4.93559	10.2441	3072.57	1.175	3275.57	1.15765	24	12	56	382	14.9786	11.3246	126466	1.32017	466	499.988	5.25914	11.7271	14.5987	17.9374	16.9765	18.2429	5.55682	1.26319	3.26319	3.7392	0.0167507
320	7.9566	32786	5.8881	-0.57842	3.90482	4.91698	10.1779	3049.36	1.19954	3270.22	1.16318	27	13	56	391	15.7752	12.1759	124797	1.29592	455.906	494.662	5.25672	11.3084	13.6261	17.1345	15.0383	18.1665	5.52338	1.26319	3.26319	3.7392	0.0167507
321	8.57048	34367.3	6.10625	-0.606086	4.48059	4.89715	10.1226	3192.63	1.22316	3361.61	1.16045	30	15	57	467	14.0696	10.0545	123622	1.38	479.605	492.467	5.27935	12.367	13.1938	16.6896	15.1172	18.4073	5.52944	1.26319	3.26319	3.7392	0.0167507
322	10.1438	35209.3	6.38307	-0.595817	4.72231	4.97126	10.2215	3257.2	1.22223	3389.58	1.16575	28	14	59	396	16.6667	11.6943	130027	1.42	490.522	493.938	5.34655	9.33366	16.4001	15.917	15.96	17.8868	5.60493	1.26319	3.26319	3.7392	0.0167507
331	13.6684	38771.1	6.24176	-0.601923	4.54258	4.96259	4.79138	3182.02	1.25101	3414.47	1.18053	24	12	54	423	22.5354	19.856	145258	1.11673	479.528	228.698	5.51685	9.77197	14.8948	16.2576	15.0563	16.3831	5.7	1.26319	3.26319	3.7392	0.0167507
332	12.9101	38234.6	6.27771	-0.627273	4.26537	5.02299	6.44617	3074.28	1.2478	3273.51	1.18259	27	12	58	366	17.4947	15.1091	144967	1.17562	465.97	324.342	5.54372	10.2342	16.5226	17.4907	16.6669	17.3713	5.7	1.26319	3.26319	3.7392	0.0167507
333	13.2496	39423	6.18502	-0.587938	4.3856	4.94808	5.75192	3270.45	1.26551	3403.71	1.1961	26	12	59	392	12.4249	10.1049	142987	1.21156	469.545	291.947	5.53398	10.5348	16.7318	18.4882	17.3139	18.6137	5.7	1.26319	3.26319	3.7392	0.0167507
334	13.399	39796	6.40024	-0.649528	4.94458	4.93735	4.59339	3364.85	1.25693	3475.23	1.18109	21	10	56	307	20.3634	18.3969	142255	1.1096	497	222.79	5.46301	12.6274	11.7097	17.3431	15.3964	18.6009	5.7	1.26319	3.26319	3.7392	0.0167507
335	13.3449	39314.9	6.5426	-0.644417	5.2502	4.8798	4.4986	3404.18	1.26428	3488.15	1.18878	23	11	55	350	19.95	18.021	140891	1.1065	499.742	213.214	5.45489	10.5	9.62733	15.7964	12.6864	16.3708	5.70235	1.26319	3.26319	3.7392	0.0167507
336	14.2277	40625.7	6.33919	-0.594236	4.90634	4.9081	4.62119	3406.23	1.26594	3495.42	1.19094	20	10	54	283	22.5576	20.076	141312	1.11389	490.764	228.033	5.48742	10.4681	9.31029	12.7112	10.9747	15.7378	5.70836	1.26319	3.26319	3.7392	0.0167507
337	13.4336	41886.3	6.23619	-0.615313	4.46125	4.93659	5.60766	3327.69	1.27757	3433.72	1.19735	32	14	56	336	13.6682	11.2086	143746	1.23096	478.621	284.799	5.51535	10.2046	8.98056	13.5001	10.0156	14.8955	5.70263	1.26319	3.26319	3.7392	0.0167507
338	14.5419	41501.4	6.32943	-0.604688	4.54245	4.90796	5.53914	3294.77	1.27	3407.66	1.19286	29	12	56	326	19.9378	17.3026	144099	1.16628	477.643	276.797	5.50369	10.7141	7.39917	13.5559	11.0126	15.1472	5.72172	1.26319	3.26319	3.7392	0.0167507
339	13.4823	42999.8	6.32331	-0.620041	4.57648	4.93373	5.40607	3314.09	1.27844	3408.16	1.19474	41	16	55	363	11.347	10.2315	144631	1.11503	475.384	272.663	5.41305	9.88967	6.966	12.644	11.0095	15.0063	5.69802	1.26319	3.26319	3.7392	0.0167507
340	13.3213	43218.4	6.3822	-0.631629	4.90606	4.99782	4.71326	3412.03	1.27797	3473.72	1.19215	44	21	56	505	15.7476	10.4129	141847	1.17973	497.253	224.346	5.50638	7.83364	9.08722	14.2987	12.0044	15.8888	5.79337	1.26319	3.26319	3.7392	0.0167507
341	13.7961	43453	6.41576	-0.627765	4.95153	4.98505	4.73515	3357.84	1.24959	3469.14	1.17351	28	12	58	306	18.5946	15.428	139632	1.20419	498.998	223.491	5.52133	9.08765	8.63038	15.2787	12.1328	16.0516	5.8011	1.26319	3.26319	3.7392	0.0167507
342	13.0415	43276.5	6.6332	-0.606163	4.52525	5.12393	5.49393	3116.04	1.2426	3204.86	1.16268	44	17	59	375	14.6652	12.9305	144431	1.14292	471.449	268.29	5.53685	9.6452	9.48826	15.6652	12.6964	16.3715	5.79245	1.26319	3.26319	3.7392	0.0167507
343	11.295	43533.1	7.03546	-0.581431	4.87686	5.13024	5.6729	3124.13	1.26624	3175.2	1.1826	57	23	55	473	8.3239	7.50396	151821	1.12274	483.819	269.501	5.51783	11.016	9.47336	16.578	12.9375	17.3875	5.80138	1.26319	3.26319	3.7392	0.0167507
344	12.052	43062.7	6.30605	-0.606202	4.82729	4.97263	4.62417	3377.03	1.26998	3438.32	1.18401	39	16	55	327	7.96341	6.64946	148490	1.20188	490.789	208.279	5.45354	11.4132	8.7659	16.3401	12.8711	17.7591	5.79344	1.26319	3.26319	3.7392	0.0167507
345	12.832	43385.3	6.39607	-0.608037	5.28582	5.00092	4.87304	3439.53	1.27421	3481.88	1.18434	39	16	55	313	9.76168	8.11888	150620	1.20547	501.562	221.778	5.46551	9.26429	9.34702	15.6488	12.9487	15.6189	5.80252	1.26319	3.26319	3.7392	0.0167507
357	14.7081	43487.9	5.88772	-0.58386	4.42333	4.42572	4.47832	3378.55	1.23532	3463.4	1.15556	38	17	56	369	15.0975	10.1477	138987	1.50321	482.121	249.65	5.16354	8.92546	4.55975	13.4983	10.2513	15.5308	5.13064	1.26319	3.26319	3.7392	0.0167507
358	14.1507	40453.5	6.16144	-0.6	4.2214	4.44555	4.70855	3074.91	1.20697	3273	1.13903	23	10	54	356	16.9637	11.5654	135539	1.48	468.407	256.925	5.07956	12.9392	7.50503	16.1534	11.9156	17.5006	5.16312	1.26319	3.26319	3.7392	0.0167507
359	14.191	39284.5	6.29493	-0.569604	4.41079	4.50091	5.05154	3168.1	1.21866	3313.27	1.13958	23	11	54	344	17.9399	11.8532	132905	1.51655	478.299	275.08	4.91079	12.414	7.73161	15.0672	11.8858	16.5311	5.15624	1.26319	3.26319	3.7392	0.0167507
360	15.8755	39858.9	6.61601	-0.578237	4.70989	4.58472	4.92656	3143.42	1.2247	3268.67	1.13584	37	16	55	383	15.9976	10.668	134611	1.50549	487.004	264.215	5.12208	11.1083	7.2387	13.6175	10.1524	15.1502	5.13633	1.26319	3.26319	3.7392	0.0167507
361	15.2415	41221	5.77867	-0.571733	4.2792	4.25463	4.78656	3361.85	1.22456	3474.58	1.1556	20	9	54	288	21.3524	13.9176	131566	1.54689	477.984	286.183	4.96351	11.0336	7.48878	14.4091	11.3064	16.4175	5.14773	1.26319	3.26319	3.7392	0.0167507
362	15.1899	42234	5.99515	-0.544941	4.65068	4.35417	4.95612	3413.11	1.24203	3491.56	1.16056	22	11	54	303	19.2728	12.4058	132291	1.55	481.068	288.555	5.098	10.9165	6.48413	15.4684	10.8409	15.7784	5.1701	1.26319	3.26319	3.7392	0.0167507
363	14.9685	43506.5	5.88121	-0.586177	4.42289	4.282	5.03298	3413.21	1.24111	3482.71	1.15966	23	11	54	347	18.2014	11.7152	132292	1.5494	483.463	297.332	5.13074	11.4554	7.30191	15.2537	11.856	16.8248	5.12297	1.26319	3.26319	3.7392	0.0167507
365	13.1229	39992.2	5.75565	-0.628131	4.08439	4.37932	4.74305	3345.12	1.24761	3461.69	1.15914	28	16	53	389	13.1417	8.54415	130633	1.54	466.811	269.593	4.99901	10.9511	7.15751	15.2118	11.7436	15.931	5.10445	1.26319	3.26319	3.7392	0.0167507
366	14.0465	42059.4	5.77591	-0.60533	4.02345	4.40299	4.95923	3274.92	1.23714	3418.07	1.15258	33	16	53	362	17.8807	11.9707	128053	1.51276	463.962	283.852	4.97061	13.0508	7.74934	18.2437	13.7336	18.9624	5.10633	1.26319	3.26319	3.7392	0.0167507
367	14.925	43401.1	5.77095	-0.58	4.3019	4.34588	4.96235	3343.03	1.21625	3472	1.14343	20	10	54	320	18.7967	12.3873	136830	1.50736	476.933	279.336	5.00071	8.28735	6.84274	13.0328	11.3706	13.7464	5.1054	1.26319	3.26319	3.7392	0.0167507
368	15.5837	43088.5	5.78346	-0.563613	4.58779	4.3542	5.03929	3445.22	1.22388	3499.73	1.14769	21	10	55	381	21.1074	13.492	133727	1.57122	491	289.221	5.01548	8.80551	5.8012	12.7588	10.8448	13.6715	5.12477	1.26319	3.26319	3.7392	0.0167507
369	15.5041	43273.5	5.86989	-0.605843	4.46337	4.29981	5.07685	3422.02	1.23672	3497.34	1.1561	23	11	57	305	18.8424	12.1072	132927	1.56	484.564	292.863	5.11472	9.78613	7.13647	14.5931	12.3183	14.962	5.12067	1.26319	3.26319	3.7392	0.0167507
370	14.6735	43097.3	5.8283	-0.599787	4.38362	4.3707	4.73491	3357.03	1.21607	3442.03	1.13808	21	10	55	368	17.1772	11.1795	130961	1.54	483.467	262.23	5.10596	10.351	6.99618	14.2441	11.8297	14.99	5.11979	1.26319	3.26319	3.7392	0.0167507
371	14.5001	42750.4	5.77996	-0.63681	4.10102	4.44958	4.81821	3305.19	1.22473	3421.47	1.13942	24	12	57	384	16.9444	11.4199	127819	1.5	469.174	272.287	5.09918	10.6643	7.44976	14.0252	12.4579	15.9558	5.13851	1.26319	3.26319	3.7392	0.0167507
372	14.2646	43399.7	5.77686	-0.634276	4.13074	4.4524	5.16346	3340.94	1.23277	3444.07	1.14579	25	12	59	454	14.7311	9.79141	127731	1.5	473	297.124	5.16078	10.7988	7.57226	15.2723	12.135	15.9528	5.13227	1.26319	3.26319	3.7392	0.0167507
374	15.47	42254.2	5.82089	-0.615405	4.56762	4.23247	5.11247	3435.18	1.22229	3500	1.15019	18	9	50	273	20.9101	13.597	130246	1.54	495.856	300.441	4.99682	9.91605	6.42463	15.0416	12.2764	15.7791	5.13394	1	3	3.89599	0.343398
375	14.7408	42386.7	5.78946	-0.605152	4.74356	4.30869	5.2778	3478.05	1.2296	3500	1.14574	20	10	50	265	19.0149	12.3288	126971	1.54407	499	303.876	4.98365	10.4875	4.09029	14.0524	11.0541	14.0125	5.13419	1	3	3.89599	0.343398
376	14.6988	42626.2	5.87643	-0.582599	4.84009	4.34773	5.20617	3496.4	1.24942	3500	1.15748	27	13	52	306	14.2368	9.25617	131491	1.54996	498.233	295.839	4.99626	10.2299	6.32191	12.7208	11.5299	13.4343	5.13245	1	3	3.89599	0.343398
377	14.2456	42321.1	5.93892	-0.622265	4.46187	4.42627	4.87453	3364.74	1.24215	3452.53	1.15179	31	15	53	413	12.2111	8.20518	136450	1.49119	476.052	279.41	5.06903	11.5713	7.29758	13.9682	13.2633	16.1031	5.12774	1	3	3.89599	0.343398
378	15.069	42065.5	5.77537	-0.61863	4.23576	4.27125	4.75996	3345.21	1.21842	3445.86	1.14918	20	10	50	350	17.7238	11.6467	134286	1.52349	480.732	252.293	5.10864	10.9746	7.85566	14.5354	14.1159	15.9733	5.11156	1	3	3.89599	0.343398
379	15.4086	42143.4	5.76957	-0.616705	4.36751	4.32925	5.22283	3370.14	1.20422	3466.94	1.14048	23	11	50	299	18.8574	12.2323	130019	1.55021	486.711	309.811	4.97304	13.2815	7.02748	15.3835	14.2469	17.7146	5.10618	1	3	3.89599	0.343398
380	14.6696	41284	5.69739	-0.607833	4.49217	4.32823	5.39957	3421.89	1.20067	3498.71	1.13138	18	9	51	261	21.1599	13.6231	119604	1.55498	491	308.695	4.91153	14.1801	5.48624	17.6239	15.5963	19.5108	5.13594	1	3	3.89599	0.343398
381	15.1	42182.5	5.73294	-0.583059	4.53388	4.32267	5.26163	3427.21	1.21098	3499.97	1.1381	18	9	50	287	19.695	12.6878	125225	1.56	491	302.852	4.99122	10.6027	4.75466	13.6716	12.5754	15.0364	5.13514	1	3	3.89599	0.343398
382	14.7259	42062	5.70312	-0.623958	4.51224	4.35622	5.22082	3451.74	1.22667	3499.78	1.14298	24	11	50	322	20.5796	13.2545	125198	1.55586	490.969	298.221	4.96159	10.8031	7.16604	13.3433	12.7956	14.7202	5.1355	1	3	3.89599	0.343398
383	14.1584	42284.5	5.88218	-0.646399	3.89095	4.45014	4.64972	3235.98	1.22611	3358.78	1.13359	29	13	51	518	10.3747	7.19631	126281	1.54	463	248.972	5.07702	10.759	7.11347	13.3427	12.7699	14.7284	5.1221	1	3	3.89599	0.343398
384	14.2152	43006.9	5.68671	-0.664484	4.23175	4.36667	4.97908	3358.15	1.20307	3471.39	1.12564	22	11	52	420	16.726	10.8162	125180	1.55028	483.624	288.629	5.02973	10.0898	8.24572	14.1349	13.1929	15.772	5.11209	1	3	3.89599	0.343398
385	14.362	40980.9	5.78112	-0.651011	4.33326	4.39647	4.80019	3330.53	1.20333	3422.03	1.12671	20	10	53	374	17.8525	11.8866	122544	1.5	485	274.33	4.93775	10.0726	8.39924	14.4995	13.6467	15.9473	5.10045	1	3	3.89599	0.343398
386	14.4905	41164.7	5.88526	-0.662899	4.56511	4.45789	5.59231	3406.37	1.20012	3478.03	1.135	22	11	53	331	21.2966	13.9281	120903	1.53	499	325.808	5.07817	11.7141	8.0924	16.2873	14.3349	18.3124	5.30513	1	3	3.89599	0.343398
387	15.1036	42453	5.93627	-0.639951	4.94848	4.45232	5.42384	3401.97	1.19469	3479.03	1.12682	27	13	56	308	19.9883	12.8489	126036	1.56038	501.392	312.349	5.10319	9.99692	6.92952	12.5779	12.4985	15.47	5.30337	1	3	3.89599	0.343398
388	14.797	42068.7	5.86048	-0.607796	4.51828	4.53126	5.63104	3370.99	1.19783	3479.57	1.1307	17	8	55	298	22.1067	14.6071	123991	1.54636	491	320.634	5.16371	9.2036	6.01503	12.9603	11.5748	14.3368	5.29892	1	3	3.89599	0.343398
389	13.897	41626.2	6.03397	-0.556532	4.54133	4.60353	5.39333	3325.81	1.19227	3449.2	1.12821	21	10	55	369	19.5694	12.6186	125188	1.55271	488.618	300.216	5.3034	9.82404	8.59731	14.1342	13.2313	14.8496	5.41418	1	3	3.89599	0.343398
390	14.6144	43343	6.03218	-0.617711	4.42052	4.72633	5.46868	3295.17	1.20846	3451.54	1.131	21	10	57	369	18.2002	12.0783	125626	1.51	487	293.415	5.277	9.65589	8.58617	14.8703	13.6553	15.3399	5.4	1	3	3.89599	0.343398
391	14.6696	41967.4	6.03294	-0.630549	4.47088	4.67933	5.39921	3313.28	1.21383	3456.04	1.13316	20	9	55	349	19.0923	12.7309	124819	1.5	487	292.732	5.26659	9.17154	8.16569	14.5931	11.6645	15.2787	5.39992	1	3	3.89599	0.343398
392	15.2009	41873	6.00411	-0.60411	4.28904	4.65386	5.57363	3157.92	1.19997	3397.02	1.13283	21	10	58	364	18.871	12.4966	127108	1.51	480.983	302.985	5.28976	9.96629	8.08046	13.8356	12.42	15.4077	5.40182	1	3	3.89599	0.343398
393	13.4533	40337.6	5.94494	-0.616	4.53671	4.63689	5.52757	3342.62	1.20564	3450.94	1.13243	25	12	56	343	19.0276	12.2483	125259	1.55275	493.21	305.854	5.182	9.3565	5.54514	14.1763	12.6439	15.2287	5.39992	1	3	3.89599	0.343398
394	11.3125	35980.8	5.59377	-0.566753	3.94442	4.63555	5.29015	3066.96	1.14102	3354.42	1.10713	23	10	55	320	22.4073	14.6563	131206	1.5318	469.852	274.158	5.00532	8.11304	9.47819	14.4631	13.7649	15.5458	5.04355	1	3	3.89599	0.343398
395	11.5976	33110.6	5.30316	-0.570253	3.77152	4.13708	5.347	3193.77	1.16408	3473.1	1.1068	14	7	57	274	25.7245	16.5692	114149	1.54737	463	314.266	4.69536	9.24292	8.90577	15.3827	14.6805	16.1399	4.82004	1	3	3.89599	0.343398
396	15.5935	37424.6	5.45595	-0.585405	3.88432	4.03795	5.57121	3184.19	1.17285	3435.52	1.10795	17	8	56	314	22.7817	14.7897	123931	1.54004	466	342.614	4.84919	10.0037	8.16693	15.1777	14.5779	15.7495	4.81117	1	3	3.89599	0.343398
397	15.6965	41025	5.48069	-0.601153	3.92392	4.09905	5.29024	3261.75	1.19754	3453.08	1.12367	16	8	55	277	23.506	15.3719	122313	1.53012	466	322.493	4.83876	11.3819	9.03538	15.4925	14.9624	16.2423	4.81354	1	3	3.89599	0.343398
398	15.7779	42087	5.38542	-0.589286	3.92113	4.02353	5.35466	3310.42	1.20847	3477.12	1.12993	17	8	57	257	24.8154	16.0412	120757	1.55336	466	325.914	4.72812	10.4586	7.14696	16.0157	14.9756	15.9005	4.82212	1	3	3.89599	0.343398
399	15.9619	42705.8	5.57988	-0.583183	4.29009	4.07965	5.28387	3403.82	1.19768	3488.64	1.14199	16	8	55	269	23.9273	15.1444	126761	1.58	494.613	331.062	4.87237	9.71449	7.29703	13.7772	12.6732	13.961	4.82252	1	3	3.89599	0.343398
400	15.5001	41774	5.74467	-0.601729	5.02507	4.04988	5.57458	3499.06	1.21576	3500	1.13672	16	8	56	337	23.6033	15.139	123880	1.56	514.677	354.717	4.90466	8.80906	6.33834	15.3842	13.6365	14.9831	4.82382	1	3	3.89599	0.343398
401	16.7286	42840	5.61261	-0.573607	4.73196	3.88959	5.04843	3439	1.23138	3500	1.15455	17	8	54	361	23.3959	14.9765	123239	1.56002	487.056	328.036	4.7868	8.85878	6.24906	15.4017	13.9641	13.7341	4.87006	1	3	3.89599	0.343398
402	16.5208	43115.9	5.60623	-0.600271	4.52629	4.00915	4.99308	3472.54	1.24576	3499.97	1.15401	20	10	56	321	21.3429	13.9355	123419	1.53	486.263	318.467	4.84228	9.16543	5.65936	13.3189	12.11	13.2325	4.86778	1	3	3.89599	0.343398
403	15.9064	42868	5.60413	-0.647936	4.40092	4.11361	4.86616	3433.11	1.25039	3497.8	1.15467	20	10	58	387	18.5896	11.945	123632	1.56	483.762	303.535	4.88891	9.82611	6.81163	15.4902	14.272	16.0125	4.81911	1	3	3.89599	0.343398
404	15.8315	42345.7	5.51354	-0.625178	4.05653	4.12961	4.82216	3317.21	1.22853	3462.2	1.14179	21	9	57	280	20.3102	13.2249	121861	1.54	470	295.437	4.8382	11.2869	6.43464	15.1935	14.2249	16.3474	4.82454	1	3	3.89599	0.343398
405	15.5204	41420.9	5.51432	-0.625971	4.1165	4.045	4.6996	3323.84	1.22378	3467.39	1.1414	18	9	46	283	20.3366	13.3218	119754	1.52	472.658	290.684	4.82573	11.6588	7.2312	16.3475	15.6805	16.9897	4.82735	1	3	3.89599	0.343398
407	16.7046	43281.9	5.66582	-0.642938	4.94895	4.02844	5.30606	3473.14	1.23785	3500	1.15166	18	9	56	239	22.1869	14.0872	123413	1.57088	499.284	332.632	5.00174	10.1179	5.96925	14.8287	13.8206	15.1729	4.87133	1	3	3.89599	0.343398
408	15.567	43229.9	5.58232	-0.652507	4.67203	4.0537	5.23478	3480.22	1.23102	3500	1.14473	21	10	55	251	21.0783	13.3161	121437	1.58013	499.002	328.4	4.8759	10.418	5.55009	15.2577	12.9115	15.4863	4.87406	1	3	3.89599	0.343398
409	17.0197	42617.9	5.68404	-0.622476	4.76398	3.36808	5.47339	3404.09	1.21913	3499.51	1.14631	15	7	54	209	26.5581	17.1903	126236	1.54669	490.263	355.804	5.00554	9.31468	5.26386	13.9189	12.951	14.6868	4.82693	1	3	3.89599	0.343398
410	16.8349	43503.9	5.73393	-0.638988	4.64286	3.74226	5.05921	3441.29	1.23134	3499.63	1.14534	18	8	55	264	23.0572	15.2366	125507	1.5199	495.673	341.093	4.99906	9.85104	5.39531	14.9762	14.3739	15.3609	4.82778	1	3	3.89599	0.343398
411	15.8927	42255	5.50993	-0.610265	4.19139	4.10437	4.90191	3343.83	1.20816	3494.42	1.12772	15	8	54	242	26.1107	16.8407	119384	1.54921	478	294.397	4.83863	10.6652	6.82578	14.2121	13.8424	15.182	4.86029	1	3	3.89599	0.343398
412	16.7567	41839.4	5.08197	-0.542177	2.91122	3.81765	5.91569	2915.4	1.21312	3232.42	1.14104	15	7	55	242	27.5272	17.556	120379	1.57	410.116	361.406	4.56003	11.3919	7.0906	14.6182	14.5284	15.1829	4.49977	1	3	3.89599	0.343398
413	16.5307	40693.8	5.22377	-0.551594	2.91449	3.70837	5.52033	2918.18	1.23449	3204.97	1.14877	18	8	53	301	23.9768	15.6785	122131	1.5434	409.817	346.498	4.66932	11.0094	6.66601	14.9827	14.8848	15.4839	4.49971	1	3	3.89599	0.343398
414	17.1799	43007.1	5.24691	-0.621348	3.65084	3.79931	7.32454	3289.14	1.21265	3424.77	1.14254	19	9	58	314	22.9572	15.1431	121710	1.5238	461.465	432.289	4.68759	12.149	5.56803	13.5023	13.8702	15.2054	4.49934	1	3	3.89599	0.343398
415	16.5339	41216.2	5.56862	-0.632551	4.72319	3.97391	7.89155	3434.38	1.22107	3497.39	1.15071	15	7	53	237	23.3498	14.6411	120895	1.59188	490.048	452.051	4.85225	12.3879	5.48182	14.5384	13.6154	15.0662	4.6818	1	3	3.89599	0.343398
416	15.3898	42679.9	5.40363	-0.622346	4.49441	3.92074	7.83479	3463.56	1.23752	3496.25	1.13961	23	11	56	259	21.2774	13.9479	119018	1.52998	490	455.3	4.62561	11.6684	5.51487	14.9682	14.0595	14.9491	4.69432	1	3	3.89599	0.343398
417	15.939	43137.7	5.45684	-0.616622	4.72677	3.90088	8.02854	3476.36	1.24679	3500	1.1486	19	9	57	286	21.0058	13.7173	118662	1.55796	490	459.142	4.73682	11.6826	5.70693	15.0297	14.1738	15.1593	4.69653	1	3	3.89599	0.343398
418	16.0557	42953.4	5.34742	-0.580674	3.07191	3.96679	6.36642	2986.16	1.24693	3265.24	1.15155	26	13	56	327	14.7407	9.55978	122364	1.55121	415.726	335.798	4.8309	11.811	5.17854	15.0313	14.3058	14.6895	4.67582	1	3	3.89599	0.343398
419	15.6134	42768.1	5.28287	-0.535417	2.83079	3.78416	7.36107	2912.77	1.24724	3078.41	1.16863	20	10	56	309	19.1321	12.3811	120854	1.54651	403	422.765	4.84514	12.2395	4.37944	15.9622	15.2488	15.999	4.64884	1	3	3.89599	0.343398
420	17.3572	43118.6	5.15113	-0.479668	2.8539	3.58734	6.6834	2961.57	1.25861	3193.34	1.17233	19	9	55	319	20.2907	13.2624	119447	1.53234	403	390.693	4.66961	12.0457	4.06957	14.2965	13.3419	14.0701	4.49426	1	3	3.89599	0.343398
421	17.1582	41448.6	5.1763	-0.563507	3.00047	3.67891	7.47285	3028.72	1.26077	3261.36	1.17323	21	10	57	292	19.7025	12.5932	119314	1.56	414	418.531	4.66833	12.3402	3.87113	14.1243	13.5306	14.675	4.5	1	3	3.89599	0.343398
426	17.3597	40958.9	5.11684	-0.589211	2.87658	3.57657	7.66182	3094.22	1.27343	3339.3	1.18496	19	9	56	279	21.3668	13.6484	116670	1.56646	409.558	446.39	4.59079	10.9467	4.46389	14.1362	13.9003	14.761	4.45404	1	3	3.89599	0.343398
427	15.1812	43317.7	5.31545	-0.596748	3.23211	3.93853	7.27956	3201.79	1.27623	3298.3	1.16823	27	13	55	349	16.1092	10.5546	119801	1.53229	431.913	418.817	4.71951	10.2456	3.79772	15.0587	14.5651	15.4151	4.56538	1	3	3.89599	0.343398
428	16.5427	43534.9	5.24839	-0.606682	3.18733	3.66357	6.83776	3210.55	1.28168	3352.55	1.17579	22	11	55	314	18.1241	12.0865	120864	1.5	427	398.274	4.72408	10.1363	3.7376	13.3125	12.3522	14.0128	4.53587	1	3	3.89599	0.343398
429	17.9811	42947.7	5.42884	-0.605391	4.36333	3.63022	8.186	3455.6	1.284	3496.89	1.18669	18	9	55	285	22.0507	14.5902	122693	1.51991	471.013	473.44	4.6712	7.95563	3.92621	13.1929	12.6745	13.5556	4.53297	1	3	3.89599	0.343398
430	16.8189	43177.1	5.48824	-0.606588	5.20485	3.72233	8.10913	3500	1.28644	3500	1.18145	21	13	57	343	16.1816	10.3428	117539	1.56847	511.478	473.204	4.69361	9.41937	6.17633	15.6328	14.8288	16.1152	4.53231	1	3	3.89599	0.343398
431	17.7213	42316.7	5.47864	-0.613568	4.68744	3.64617	7.88095	3494.09	1.28181	3500	1.1834	18	10	57	267	21.1048	14.0178	118796	1.5094	491	462.325	4.67617	9.85981	6.03565	15.1715	14.3456	16.2178	4.53789	1	3	3.89599	0.343398
432	16.4613	43039.5	5.47282	-0.634466	4.74563	3.71523	7.83447	3500	1.29238	3500	1.18255	24	13	56	326	15.6478	10.0762	119798	1.56066	493.311	459.551	4.67128	8.69334	5.60215	14.4417	13.5345	14.4121	4.53721	1	3	3.89599	0.343398
433	16.8173	43275.5	5.39641	-0.605074	4.9601	3.73676	7.89077	3499.09	1.28014	3500	1.17747	23	13	58	364	17.5749	11.2261	120911	1.5708	497.704	461.179	4.72794	7.95291	5.45134	14.4789	13.8184	15.7967	4.5367	1	3	3.89599	0.343398
434	16.6889	43418.7	5.42317	-0.616284	5.18244	3.79191	7.97108	3499.29	1.28975	3500	1.17706	29	16	52	395	15.8141	10.1957	120990	1.55633	509.828	463.332	4.72095	9.01323	4.72972	15.4705	14.4239	16.5762	4.52461	1	3	3.89599	0.343398
435	16.9081	43212.5	5.38991	-0.604225	4.52488	3.50522	8.00696	3494.57	1.28751	3500	1.18104	24	13	55	335	18.7431	12.2549	121988	1.54	482.981	470.985	4.67989	9.67713	5.82086	15.5469	14.582	14.7593	4.49883	1	3	3.89599	0.343398
436	15.4342	43560.1	5.28801	-0.592066	4.28081	3.81125	8.12523	3475.83	1.28469	3496.19	1.17328	27	15	56	436	14.5637	9.45517	121156	1.54	473.932	460.775	4.68226	9.49683	5.67625	15.3943	12.3019	16.1223	4.5059	1	3	3.89599	0.343398
437	17.0437	43327.3	5.34203	-0.604762	4.13251	3.66468	7.93652	3460.68	1.2837	3497.09	1.1752	24	13	56	369	16.7413	11.058	125181	1.5391	467.122	460.038	4.7421	9.40936	5.16903	11.6733	11.0676	13.2473	4.53407	1	3	3.89599	0.343398
438	15.9086	44122.9	5.30964	-0.616981	4.34352	3.77116	7.88428	3453.87	1.28736	3495.56	1.177	25	14	56	393	16.7642	10.6603	123799	1.57373	472.275	452.623	4.70231	10.6382	5.78153	13.4806	12.3624	14.6161	4.52488	1	3	3.89599	0.343398
439	16.2754	44270.2	5.42008	-0.597132	4.88394	3.75079	7.9683	3499.08	1.28146	3500	1.17291	23	12	57	399	16.1374	10.3719	126542	1.55524	499	462.377	4.61628	11.2227	5.81186	13.731	13.1152	14.9599	4.52029	1	3	3.89599	0.343398
440	16.7904	43768.1	5.66975	-0.585748	4.98516	3.69961	7.99865	3498.74	1.28411	3500	1.18275	19	11	58	329	19.4229	12.5048	123420	1.55672	499.474	465.094	4.74272	10.8648	5.40638	12.7824	13.0522	14.8854	4.52762	1	3	3.89599	0.343398
441	18.1269	43846.3	5.76506	-0.60292	5.00502	3.7243	8.03795	3500	1.30301	3500	1.19676	19	10	56	312	20.3645	13.0247	123702	1.5654	500	466.402	4.78816	10.2147	5.82589	13.8417	13.2394	14.5965	4.53079	1	3	3.89599	0.343398
442	17.3342	44501.5	5.58094	-0.598899	4.6978	3.78947	8.10835	3498.77	1.29689	3500	1.18457	22	11	53	365	16.8733	11.0225	124584	1.53	491	463.303	4.76843	9.03455	6.10523	13.7178	12.8729	14.7786	4.48518	1	3	3.89599	0.343398
443	18.3437	44089.2	5.39384	-0.570088	4.5607	3.593	8.41643	3495.07	1.29603	3500	1.19181	17	9	55	289	22.8655	14.8928	122982	1.53819	484	485.587	4.72478	9.19901	6.24774	14.4018	13.5631	15.6068	4.48575	1	3	3.89599	0.343398
445	15.8218	44479.4	5.35259	-0.605578	4.38456	3.90936	8.12906	3491.04	1.29837	3500	1.18382	25	13	56	424	15.7773	10.3634	124447	1.49797	473.924	458.223	4.824	10.222	5.5311	13.6783	13.1971	14.095	4.68922	1	3	3.89599	0.343398
446	15.5674	44044.8	5.41655	-0.62446	3.81403	3.86785	7.83644	3427.57	1.30614	3478.3	1.19173	32	17	59	418	14.8542	9.948	124809	1.5611	452.655	442.945	4.9961	8.99332	5.02091	13.5872	14.3018	15.6918	4.68879	1	3	3.89599	0.343398
455	10.7231	32083.1	5.25556	-0.650242	5.40717	3.95757	6.01175	3500	1.13521	3500	1.06078	21	10	57	337	21.3761	14.14	126008	1.51466	537.038	386.08	4.42049	8.83957	6.55927	15.2715	13.6644	16.0325	4.69356	1	2.73076	4	0.486342
456	12.7292	34622.8	5.33538	-0.618205	5.31513	4.0537	6.22178	3500	1.16464	3500	1.06904	20	9	56	336	20.8025	13.7226	122831	1.5191	535	389.355	4.72051	8.64746	5.32323	13.9392	11.4644	14.6597	4.67513	1	2.73076	4	0.486342
457	12.7951	36761.3	5.40117	-0.641686	5.38243	3.89865	5.99788	3495.63	1.1753	3500	1.09024	20	9	55	349	19.5805	12.7066	123860	1.54	519.513	373.054	4.77479	8.84312	5.29924	13.5258	12.5168	14.2026	4.6708	1	2.73076	4	0.486342
458	13.9724	38958.1	5.3849	-0.638444	5.17025	4.00981	6.17019	3497.48	1.19575	3500	1.08502	22	10	60	356	18.9134	10.6492	122538	1.52013	521.412	382.655	4.70088	7.49122	5.38532	14.3423	13.2111	14.4593	4.66972	1	2.73076	4	0.486342
459	15.7074	42320.4	5.32034	-0.629336	3.86188	3.91975	6.3418	3271.73	1.19894	3346.94	1.10381	25	11	56	387	17.5616	11.8063	127174	1.49	455.103	370.931	4.76188	8.82718	6.38915	14.9048	13.2648	15.005	4.69148	1	2.73076	4	0.486342
460	14.4396	41357.6	5.69922	-0.636292	4.33394	3.89289	7.42026	3195.43	1.20338	3353.9	1.13077	21	10	56	334	21.2653	14.1026	122905	1.50995	482.125	436.97	4.69491	9.92337	5.03946	15.6298	14.0584	15.8943	4.68951	1	2.73076	4	0.486342
461	11.6093	37731.3	5.59891	-0.681148	4.72022	4.02365	6.8732	3359.44	1.20845	3437.14	1.12101	23	10	56	380	21.8646	14.6901	113213	1.49	499	410.164	4.56485	11.3466	6.63745	15.2943	13.4653	15.5022	4.66803	1	2.73076	4	0.486342
463	14.5602	38427.3	5.15781	-0.672917	5.03594	3.6428	6.29828	3499.84	1.19099	3500	1.10382	17	8	56	330	21.7905	14.4557	111106	1.51	522.006	411.172	4.35469	8.5653	5.19207	14.7371	12.3864	15.3011	4.40651	1	2.73076	4	0.486342
464	14.9688	37887	5.19159	-0.685129	5.25524	3.68668	5.96252	3497.92	1.18874	3500	1.08748	21	10	56	405	17.3918	11.5348	114330	1.51	523.025	389.33	4.33987	8.43071	5.38901	15.211	12.754	14.4661	4.40022	1	2.73076	4	0.486342
465	18.2149	42232.1	5.26872	-0.668502	5.02313	3.648	5.93236	3497.53	1.20443	3498.59	1.10405	22	10	55	380	17.5307	11.6298	125012	1.51	514.868	388.305	4.55551	8.80986	5.0721	13.3532	11.9079	13.6383	4.40352	1	2.73076	4	0.486342
466	13.0702	37778	5.16739	-0.670652	5.49731	3.68781	6.12742	3500	1.19892	3500	1.09458	22	10	56	387	17.8002	11.7749	119072	1.50998	531.292	401.486	4.3238	9.40325	5.23622	14.4786	13.3807	14.331	4.43166	1	2.73076	4	0.486342
467	12.9495	38121.5	5.4492	-0.66016	4.4115	3.74614	6.87837	3328.78	1.20777	3447.22	1.11245	21	10	54	312	21.4669	14.2865	115428	1.5	487	420.925	4.34327	9.46945	5.61036	15.0368	13.3269	15.6739	4.40918	1	2.73076	4	0.486342
468	13.319	38260.7	5.08085	-0.630141	3.39296	3.76613	6.9819	3034.7	1.21081	3289	1.13306	20	9	55	303	23.0107	15.464	112709	1.49	435.287	417.371	4.27676	8.74553	6.6852	15.7926	13.5329	16.382	4.40685	1	2.73076	4	0.486342
496	8.99	29197.3	4.76489	-0.421277	2.46064	3.71513	7.34079	2591.87	1.17132	2820.45	1.25825	20	13	59	277	22.2307	14.9274	116703	1.50476	375.601	422.529	4.1102	8.73251	4.92332	14.6463	13.2636	14.4666	4.30475	1	2.73076	4	0.486342
497	13.0045	35382.4	4.804	-0.467033	2.80187	3.72352	7.62725	2720.23	1.19785	2821.67	1.25837	35	21	59	334	20.9499	14.2389	117080	1.48266	397.317	422.477	4.1884	9.37849	4.8016	14.7927	13.7203	14.7428	4.31062	1	2.73076	4	0.486342
498	12.78	36854.2	4.77519	-0.485744	2.49348	3.74938	7.14236	2635.99	1.20929	2696.86	1.25732	35	22	59	371	17.6339	12.0514	119834	1.47428	379.647	393.226	4.16788	7.01867	4.67763	11.988	11.4732	13.5733	4.30131	1	2.73076	4	0.486342
499	12.7637	36273.4	4.83495	-0.525728	2.66117	3.64549	7.5503	2723.07	1.20653	2843.12	1.25878	31	19	59	403	16.4886	11.6968	119639	1.40553	397.329	432.629	4.09357	7.70892	4.7588	12.4659	11.8942	12.3484	4.22743	1	2.73076	4	0.486342
500	7.2727	27071	4.85579	-0.521842	2.46842	3.99024	8.97744	2595.16	1.1972	2887.14	1.33526	26	16	51	346	21.7469	12.6503	115128	1.38204	377.426	471.839	4.43632	7.2572	4.91067	11.5217	11.0216	11.2404	4.21807	1	2.73076	4	0.486342
501	6.64554	25096.3	4.83504	-0.494389	2.42798	4.03607	8.82485	2584.77	1.20221	2860.05	1.33296	27	20	53	315	21.2226	15.0924	116730	1.40657	374.243	464.138	4.40702	5.69918	4.81737	9.99805	9.76064	11.534	4.23236	1	2.73076	4	0.486342
502	7.01277	25314.3	4.86098	-0.485919	2.5185	4.09093	8.20665	2584.16	1.19544	2838.2	1.35683	19	14	61	337	23.0788	16.3823	114889	1.41148	379.312	454.468	4.41941	5.84538	4.92711	12.0883	10.9229	11.724	4.23671	1	2.73076	4	0.486342
503	6.82885	25114.5	4.87298	-0.495	2.53636	4.08375	8.42646	2595.45	1.18979	2821.75	1.35141	18	14	60	381	19.8573	13.8808	111284	1.43442	383.126	446.544	4.42311	8.79065	4.9948	13.2534	11.7139	12.6445	4.23577	1	2.73076	4	0.486342
504	6.93244	25612.1	4.90025	-0.515271	2.65985	4.10061	8.35183	2641.42	1.19818	2874.43	1.40174	17	12	61	371	19.885	13.9445	109723	1.43	389.148	443.378	4.42713	9.07909	5.27091	14.1705	13.2746	13.616	4.24926	1	2.73076	4	0.486342
505	6.61213	25307.4	4.83547	-0.527094	2.533	4.08679	8.39411	2598.24	1.18922	2829.74	1.41044	24	16	59	376	19.8825	13.9553	104688	1.42705	384	446.429	4.4103	11.5156	5.32765	16.3213	14.7741	15.9604	4.26186	1	2.73076	4	0.486342
506	6.58525	25538.5	4.82767	-0.492	2.32257	4.1128	8.3096	2534.02	1.1965	2752.04	1.3901	23	15	62	414	19.7502	13.9996	102922	1.41216	369.808	440.214	4.4123	11.524	5.48512	16.8	13.8884	16.6216	4.22816	1	2.73076	4	0.486342
507	6.58008	25686.2	4.80686	-0.496296	2.10607	4.12353	7.93791	2446.25	1.2076	2562.69	1.32807	22	15	57	350	19.9686	14.1527	111058	1.41135	355.604	418.967	4.45167	6.62794	4.71871	11.9103	11.1713	11.7754	4.25447	1	2.73076	4	0.486342
508	6.2545	25992.6	4.80513	-0.478077	2.08065	4.09635	8.35519	2427.15	1.20995	2648.46	1.33551	22	15	60	397	18.4565	13.006	111249	1.42331	351.585	437.981	4.47995	6.89062	4.64995	12.4773	11.734	12.4307	4.2195	1	2.73076	4	0.486342
509	5.3293	25171.1	4.93648	-0.522246	2.58661	4.07687	8.30925	2601.84	1.18129	2700.84	1.32081	19	13	59	386	17.6968	12.5843	104973	1.41	394.477	445.066	4.41076	9.41081	5.10435	13.752	12.8923	13.9197	4.2446	1	2.73076	4	0.486342
510	5.68197	23790	4.87674	-0.522542	2.5199	4.09485	8.21861	2573.9	1.18702	2643.44	1.32367	21	15	52	336	18.9717	13.5644	111120	1.40048	389.273	437.549	4.41355	7.12995	4.91239	11.7949	10.8923	11.8183	4.22414	1	2.73076	4	0.486342
511	5.94406	24800.3	4.82308	-0.492899	2.46818	4.04063	8.19172	2596.15	1.19667	2689.27	1.35411	17	12	59	333	19.5572	13.9191	110238	1.40041	378.462	438.594	4.40558	8.52379	5.56518	13.8365	13.0324	13.5461	4.21531	1	2.73076	4	0.486342
512	6.01519	25249.6	4.81211	-0.525551	2.49934	4.05309	8.07218	2630.72	1.22651	2834.67	1.34667	19	13	57	355	17.762	12.7067	110608	1.4	380.051	430.78	4.38744	9.79718	5.58157	14.6819	13.9493	14.5238	4.21608	1	2.73076	4	0.486342
513	6.49743	26565.2	4.80088	-0.490235	2.04057	4.09042	8.19964	2491.46	1.24125	2573.31	1.33785	21	14	59	383	17.8405	12.7593	112982	1.39805	349.625	429.857	4.4186	6.77421	5.24228	12.1422	11.8349	11.851	4.21477	1	2.73076	4	0.486342
514	6.67431	26485	4.88392	-0.48167	2.13106	4.11143	8.35445	2416.37	1.21353	2616.01	1.31989	25	19	67	361	17.8457	12.7307	112328	1.40212	353.833	436.234	4.49247	9.06936	5.24971	14.339	13.8519	13.9467	4.20976	1	2.73076	4	0.486342
515	6.58206	25767.2	4.82404	-0.474257	2.16418	4.10792	8.18594	2453.71	1.20636	2554.03	1.31271	21	15	58	351	18.8158	13.3293	112281	1.41786	355.738	429.84	4.55152	9.10568	5.25969	12.4967	12.0725	13.6275	4.21947	1	2.73076	4	0.486342
516	6.324	25615	4.79354	-0.489152	2.5933	4.03846	8.16075	2626.37	1.20459	2723.35	1.34195	17	12	56	354	19.3716	13.7907	106385	1.4013	384	437.25	4.40518	12.7774	5.96199	15.842	14.6734	16.2542	4.2189	1	2.73076	4	0.486342
517	5.95538	25582.7	4.80094	-0.511033	2.58545	4.08008	8.59362	2624.25	1.20706	2721.04	1.33453	19	13	60	344	18.9309	13.4737	109958	1.40447	386.458	451.553	4.39832	9.30467	5.46934	12.03	11.4292	11.6914	4.23013	1	2.73076	4	0.486342
518	5.77694	25037	4.81418	-0.519315	2.58704	4.07782	8.44879	2633.35	1.21215	2863.7	1.34522	18	13	62	341	19.0847	13.6502	109953	1.4	392.526	446.54	4.40864	9.57014	5.05542	10.7779	9.84259	11.6776	4.23822	1	2.73076	4	0.486342
519	6.10434	25327.5	4.79618	-0.49311	2.54702	4.09055	8.48327	2603.38	1.20336	2678.14	1.39574	19	13	60	338	18.8028	13.4215	103442	1.40004	381.974	446.417	4.42367	12.73	5.40363	13.3078	12.3179	13.9178	4.23938	1	2.73076	4	0.486342
520	5.66268	24152.2	4.74628	-0.46108	2.14086	4.13333	8.34562	2438.98	1.20455	2626.32	1.32816	20	14	61	362	18.2084	12.9879	104746	1.40117	354.688	435.479	4.42611	11.3502	5.77783	14.9856	13.0924	14.8022	4.24003	1	2.73076	4	0.486342
521	5.39064	24171.4	4.71739	-0.486232	2.16135	4.10239	8.36235	2463.48	1.20892	2684.75	1.39121	22	15	60	347	19.2536	13.7221	111954	1.40205	354.684	437.793	4.42275	8.75975	5.0612	10.4849	9.86527	10.7804	4.25996	1	2.73076	4	0.486342
522	5.25328	24019.3	4.75977	-0.46	2.13909	4.12308	8.16529	2420.47	1.19773	2492.31	1.32751	23	15	60	361	18.5313	13.182	114530	1.40822	352.998	427.629	4.40333	8.98173	5.11375	10.0424	10.5662	9.89159	4.23606	1	2.73076	4	0.486342
523	5.56635	24049	4.7756	-0.47799	2.34221	4.09606	8.1856	2387.12	1.20528	2487.46	1.33567	22	14	60	346	19.4531	13.9174	111017	1.40544	346.871	432.215	4.42863	10.2152	5.15609	11.6635	11.0066	11.6613	4.22703	1	2.73076	4	0.486342
524	5.83813	24126.5	4.9151	-0.475686	2.78137	4.06216	8.16275	2654.71	1.18791	2799.87	1.39239	18	13	61	350	19.17	13.7263	108373	1.40004	387.538	436.824	4.39131	11.4499	5.46343	13.1678	12.3267	13.0491	4.24889	1	2.73076	4	0.486342
525	6.02405	24658.7	4.88975	-0.469925	2.70638	4.0406	8.09699	2606.05	1.19095	2686.91	1.33226	19	15	64	363	18.5679	13.234	108702	1.40162	389.091	435.883	4.36093	11.0395	5.20765	13.4519	12.6977	13.1875	4.24536	1	2.73076	4	0.486342
526	5.98091	24301	4.98718	-0.486214	3.13126	4.04971	7.96058	2708.32	1.18294	2757.44	1.2947	25	16	62	357	19.0297	13.6049	108684	1.39998	415	434.872	4.39769	10.7648	5.17593	13.1467	12.3262	13.2437	4.21545	1	2.73076	4	0.486342
527	5.73861	24247.1	4.85049	-0.478304	2.32821	4.1357	8.06272	2430.67	1.19077	2498.42	1.29929	23	16	60	321	18.4292	13.1963	110241	1.4	367.349	424.164	4.40494	9.99614	5.09544	14.0353	12.6003	13.9857	4.2185	1	2.73076	4	0.486342
528	5.62423	24200.7	4.82488	-0.482592	2.13521	4.12921	7.53192	2439.73	1.22427	2617.45	1.31314	26	18	59	371	18.465	13.17	113125	1.40132	352.744	414.213	4.38236	10.6992	5.07106	11.9763	10.8963	13.4685	4.21761	1	2.73076	4	0.486342
529	6.15151	24684.2	4.81886	-0.470143	2.27321	4.12536	8.33292	2473.84	1.21276	2603.62	1.32953	20	13	55	338	18.5982	13.2391	113501	1.4	353.752	433.239	4.39194	9.20068	5.07809	13.0638	10.8466	12.937	4.21654	1	2.73076	4	0.486342
530	6.1589	25016.7	4.8472	-0.484547	2.52974	4.08703	8.07531	2556.11	1.19957	2786.05	1.33184	21	13	58	385	17.7366	12.644	108555	1.4	379.278	432.167	4.3843	11.8304	5.63488	15.4402	14.1112	14.9969	4.21789	1	2.73076	4	0.486342
531	6.15103	24641.9	4.85157	-0.475786	2.68386	4.04399	7.93549	2609.38	1.18497	2670.18	1.29309	28	19	62	377	18.4529	13.1464	109263	1.4	390.269	430.048	4.38475	10.1944	4.98947	13.0556	10.502	13.1803	4.21129	1	2.73076	4	0.486342
532	5.72246	24168.6	4.91545	-0.530227	2.78136	4.02341	8.2221	2644.87	1.2076	2691.36	1.30935	22	15	56	349	18.0581	12.8361	108922	1.40949	393.543	440.002	4.38511	11.5544	5.2525	14.7004	13.0546	14.4193	4.21008	1	2.73076	4	0.486342
533	6.13719	24513.5	4.75788	-0.517412	2.74988	4.0314	8.34981	2685.46	1.19993	2752.27	1.33245	19	13	60	321	18.7021	13.3926	110218	1.4	394.551	447.893	4.35788	8.819	5.01647	13.5583	11.4793	13.1677	4.20667	1	2.73076	4	0.486342
534	6.26512	25065.5	4.77618	-0.464564	2.08562	4.11911	8.28089	2440.46	1.2366	2602.17	1.33322	27	18	62	345	18.2	12.8954	113112	1.41	351.348	429.026	4.40049	9.3659	5.25113	13.6829	12.724	12.8862	4.20637	1	2.73076	4	0.486342
535	6.0827	25095	4.77793	-0.465056	2.1045	4.1	8.42305	2488.55	1.25072	2665.41	1.32215	23	15	61	318	18.1957	12.942	114996	1.41	351.113	436.242	4.4083	8.05684	5.03885	12.622	11.5829	12.142	4.22918	1	2.73076	4	0.486342
536	5.85079	24558.2	4.92028	-0.442586	2.11982	4.13726	8.41179	2480.24	1.26164	2672.78	1.3355	21	14	61	336	18.3591	13.0228	114649	1.41582	349.659	433.053	4.40941	9.56213	5.38184	13.8389	12.6943	11.9941	4.21252	1	2.73076	4	0.486342
537	5.45093	23919.7	4.77198	-0.476096	2.81715	4.08207	7.96693	2661.86	1.17082	2749	1.34296	22	14	59	326	18.708	13.3841	111733	1.4004	397.744	432.247	4.44444	11.2738	6.86265	16.1609	14.9526	15.9268	4.29024	1	2.73076	4	0.486342
538	5.48225	24018.3	4.77228	-0.500909	2.81795	4.0721	8.09139	2722.16	1.17707	2744.5	1.29442	19	13	58	326	18.8457	13.4627	114283	1.4	400.605	438.575	4.42114	12.337	5.78003	14.7615	12.6509	13.195	4.29444	1	2.73076	4	0.486342
539	5.60306	24300.5	4.74047	-0.456279	2.15116	4.14981	8.17203	2379.04	1.13886	2498.72	1.35481	18	12	62	333	19.1349	13.2782	118231	1.44	357.672	432.642	4.44535	10.0897	5.52524	12.7188	11.9291	12.3797	4.28713	1	2.73076	4	0.486342
540	5.52874	24003.6	4.80817	-0.464087	2.24784	4.14405	8.09464	2422	1.17788	2508.74	1.29877	19	13	59	313	19.2468	13.4067	110853	1.43625	361.502	426.746	4.43566	10.1926	5.48512	13.6425	12.6665	13.5024	4.29199	1	2.73076	4	0.486342
541	5.74415	24296.9	4.82399	-0.468235	2.15653	4.12412	8.31627	2393.81	1.19886	2596.46	1.29372	20	14	64	323	19.4994	13.5661	112462	1.44	355.551	433.292	4.42589	8.39569	5.22848	11.0225	10.0496	11.0914	4.28124	1	2.73076	4	0.486342
542	5.70217	24167.1	4.78375	-0.477732	2.1435	4.09031	8.37505	2430.72	1.22618	2533.45	1.31646	18	12	58	313	19.7252	13.7827	110578	1.43835	365.216	437.377	4.40846	8.44713	5.64944	12.4905	11.852	12.1999	4.27967	1	2.73076	4	0.486342
543	5.28551	23651.6	4.82542	-0.514628	2.73237	4.04921	8.20968	2625.98	1.22814	2819.65	1.31079	20	14	58	325	19.0468	13.5998	107488	1.4	388.993	435.856	4.43333	8.85039	5.56022	12.8405	11.1992	12.8619	4.28969	1	2.73076	4	0.486342
544	5.53691	23782.8	4.81016	-0.501354	2.76727	4.05549	8.2067	2639.5	1.21199	2725.41	1.32124	19	13	63	314	18.3469	13.1034	115399	1.4	389.172	437.475	4.51307	9.30618	5.51879	10.9643	11.7083	11.9954	4.29466	1	2.73076	4	0.486342
545	5.72831	24133.9	4.8412	-0.49012	3.00318	4.00716	8.34155	2664.7	1.21759	2746.8	1.31625	18	13	60	326	19.0795	13.6716	114996	1.39948	399.217	446.078	4.48659	9.82494	5.61378	12.6279	12.0485	12.5223	4.29462	1	2.73076	4	0.486342
546	5.80566	24365.3	4.78799	-0.504157	2.66813	4.032	8.256	2616.71	1.21766	2718.71	1.31563	19	13	60	338	18.6909	13.3846	116060	1.4005	393.272	440.116	4.44196	9.91195	5.62665	10.5809	10.8103	10.9479	4.27313	1.08508	3.08508	3.86204	0.0501676
547	5.93139	24584.3	4.75697	-0.472079	2.04062	4.13069	8.65446	2429.48	1.24305	2503.29	1.32743	21	15	62	327	19.7937	13.9836	112578	1.41976	346.798	442.927	4.40589	11.0389	5.54246	14.3035	12.9554	13.8406	4.27067	1.08508	3.08508	3.86204	0.0501676
548	5.99686	24709.7	4.78182	-0.479015	2.10236	4.10642	8.82334	2376.81	1.24562	2504.35	1.33413	17	12	59	290	19.937	13.9961	114746	1.42255	335.751	448.807	4.42078	8.74844	5.2114	12.7841	11.6972	12.1279	4.27247	1.08508	3.08508	3.86204	0.0501676
549	5.61939	24108.6	4.92909	-0.471338	2.57707	4.03949	7.88323	2370.87	1.1913	2579.1	1.27848	30	21	60	299	20.2537	14.1251	121175	1.44113	381.151	420.28	4.4116	7.33102	4.91541	12.9721	11.8339	12.3524	4.29986	1.08508	3.08508	3.86204	0.0501676
550	5.09771	23374	4.89578	-0.476448	2.85878	4.039	8.1166	2609.09	1.17978	2701.27	1.2947	18	13	59	335	19.2185	13.7293	113224	1.4	396.721	437.384	4.42549	8.12819	5.34371	13.0826	13.0483	14.0306	4.29846	1.08508	3.08508	3.86204	0.0501676
551	4.68949	23278.4	4.96888	-0.504368	2.96782	4.03017	8.29241	2654.3	1.20887	2737.47	1.31324	21	14	60	332	18.5909	13.2767	111407	1.4	406.332	443.818	4.42881	9.42667	5.52174	14.6144	13.4243	14.3403	4.29747	1.08508	3.08508	3.86204	0.0501676
552	3.54934	23433	4.78226	-0.507706	2.09032	3.87888	7.51241	2348.25	1.21283	2424.99	1.24938	35	25	60	435	15.192	10.7746	115759	1.4158	349.649	419.239	4.41688	8.90665	5.0742	12.9732	12.0869	12.8836	4.28262	1.08508	3.08508	3.86204	0.0501676
553	4.25201	24013	4.83166	-0.452422	2.04298	3.84394	7.04014	2266.25	1.17133	2343.59	1.20331	27	18	58	344	17.0083	12.0028	110295	1.41986	347.6	393.564	4.29113	10.0832	5.21925	14.1101	12.8486	13.4072	4.47317	1.08508	3.08508	3.86204	0.0501676
554	6.81038	24498.9	4.78426	-0.483206	3.32576	3.94599	7.49809	2820.44	1.18	2929.41	1.21397	21	14	60	341	17.949	12.8296	111396	1.40303	422.908	422.074	4.14865	6.0535	5.13939	12.0458	11.2555	11.5417	4.50013	1.08508	3.08508	3.86204	0.0501676
555	11.3383	31695.3	4.96994	-0.499244	3.29641	3.86318	7.6468	2754.11	1.19985	2837.6	1.23727	26	18	61	413	15.3287	10.9245	113818	1.4066	416.944	427.39	4.24464	8.2405	5.09269	12.2778	11.0328	11.8179	4.48626	1.08508	3.08508	3.86204	0.0501676
556	10.8279	31650.8	4.91832	-0.450935	3.54935	3.90748	8.04719	2857.68	1.1898	2930.16	1.22202	25	17	61	453	13.9479	9.99036	111392	1.4	430.607	445.492	4.23793	9.62955	5.12687	12.6651	11.313	12.2497	4.50115	1.08508	3.08508	3.86204	0.0501676
557	11.9629	34525.4	4.89838	-0.483243	2.79045	3.92556	7.52764	2563.54	1.20586	2729.48	1.22662	28	19	62	450	14.2389	10.1591	110936	1.40232	389.341	418.563	4.23201	10.0837	5.07368	13.35	11.9465	13.0691	4.50054	1.08508	3.08508	3.86204	0.0501676
560	3.56292	22522.5	4.70293	-0.479592	2.74341	3.94879	7.47495	2620.94	1.13201	2690.39	1.19952	23	16	58	335	17.7215	12.5484	98394.9	1.41033	397.08	409.698	4.35315	11.8647	5.74868	15.7133	14.178	16.0992	4.19474	1.08508	3.08508	3.86204	0.0501676
561	4.24736	22709.9	4.74261	-0.476804	2.81667	3.911	7.76306	2643.55	1.14457	2847.55	1.25357	36	25	61	393	17.4826	12.4861	98240.6	1.40265	401.427	435.948	4.25885	12.5142	5.50698	14.9251	13.8729	15.5839	4.19782	1.08508	3.08508	3.86204	0.0501676
562	3.39819	22362.7	4.46772	-0.500198	2.85485	3.75889	7.43083	2736.7	1.14382	2882.3	1.19722	23	15	61	414	16.1887	11.5054	93512.1	1.4	404.865	429.312	3.85505	10.2956	5.51673	11.8984	11.1465	11.4701	4.20234	1.08508	3.08508	3.86204	0.0501676
563	4.42237	23389.3	4.68365	-0.469841	2.87813	3.70714	8.03075	2666.08	1.16924	2843.59	1.23247	18	13	59	343	19.0702	13.5121	92987.1	1.4171	402.358	453.821	3.86763	8.71731	5.1523	9.9549	9.31221	9.0824	4.18814	1.08508	3.08508	3.86204	0.0501676
564	6.7697	24918.4	4.70357	-0.479622	2.86862	3.73298	7.93361	2653.69	1.17674	2931.53	1.22421	17	11	60	365	20.3053	14.3727	92578.5	1.41	400.474	429.936	3.89133	7.26496	5.41559	10.7892	10.2073	10.4493	4.18801	1.08508	3.08508	3.86204	0.0501676
566	9.17528	27824.6	4.52107	-0.503099	2.75062	3.69898	7.31839	2676.37	1.1632	2724.98	1.20021	23	16	61	455	16.8284	11.9906	94837.4	1.40031	407.721	445.44	3.90203	6.46377	4.86497	11.2142	9.8425	10.4359	4.2063	1.08508	3.08508	3.86204	0.0501676
567	9.91554	29550.9	4.59303	-0.429557	2.9	3.63596	7.84122	2677.86	1.1668	2831.48	1.21186	29	19	61	446	15.943	11.3401	97339.6	1.40913	400.235	441.514	3.97198	9.38278	5.33244	11.1101	10.3814	10.9938	4.187	1.08508	3.08508	3.86204	0.0501676
568	12.0744	32693.8	4.53702	-0.435789	2.97319	3.5607	7.75526	2738.57	1.18149	2859.29	1.21296	25	15	59	412	15.7018	11.243	98858.9	1.39811	404.051	447.067	3.98591	10.4792	5.23865	11.5593	10.7266	11.8916	4.19425	1.08508	3.08508	3.86204	0.0501676
569	9.59541	31759.1	4.80363	-0.475079	2.68908	3.80442	7.76775	2483.67	1.19288	2608.78	1.23533	34	28	70	566	12.5186	8.88713	103466	1.40992	382.009	433.555	4.06584	10.6617	4.92962	12.416	11.8954	12.6644	4.38261	1.08508	3.08508	3.86204	0.0501676
570	11.6474	36003.3	5.02695	-0.448926	2.94156	3.975	7.8615	2555.52	1.2025	2634.77	1.23041	31	19	70	499	14.0206	9.93635	109842	1.41291	395	405.082	4.33144	9.55222	5.05387	12.9209	12.6937	13.2451	4.5117	1.08508	3.08508	3.86204	0.0501676
571	10.2825	34487.7	4.87538	-0.432158	2.95299	3.93921	7.87645	2600.19	1.20093	2768.04	1.21927	32	20	68	527	13.2079	9.30776	108951	1.42	397.781	434.887	4.28724	8.89369	5.05539	13.6301	13.1306	13.78	4.53397	1.08508	3.08508	3.86204	0.0501676
572	11.0071	35702.1	4.81378	-0.506037	3.17539	3.98393	7.86735	2730.12	1.20345	2826.37	1.21259	32	21	70	575	12.1432	7.46471	110737	1.39486	413.56	423.43	4.26672	11.5804	5.64452	15.3511	14.5142	15.4518	4.51941	1.08508	3.08508	3.86204	0.0501676
573	11.9166	36502.9	4.89867	-0.492789	3.30304	3.94851	8.11565	2736.3	1.18765	2866.84	1.21505	30	18	66	393	15.1135	10.7681	114767	1.4	422.078	441.169	4.36973	12.1942	5.264	14.305	12.4199	14.0724	4.52448	1.08508	3.08508	3.86204	0.0501676
574	11.4952	35956.7	4.96299	-0.506207	2.80207	3.87538	7.99413	2496.7	1.18254	2739.87	1.23508	27	16	69	332	18.1494	12.9004	111449	1.40794	392.166	427.368	4.387	12.7665	5.37187	14.6219	13.4817	13.4615	4.54484	1.08508	3.08508	3.86204	0.0501676
575	9.97372	33502.2	5.01093	-0.540143	3.76106	3.86849	8.30744	2714.56	1.18883	2947.29	1.24679	28	17	70	322	18.1444	12.7409	111569	1.42407	442.466	462.384	4.28536	9.20407	4.82018	12.7342	10.7068	12.8373	4.53837	1.08508	3.08508	3.86204	0.0501676
576	9.72516	32560.5	5.06959	-0.568433	4.04087	3.97433	7.83502	2931.76	1.19067	3007.43	1.22451	22	14	70	286	18.5428	13.0958	106736	1.41129	456.464	440.912	4.30843	10.6882	4.79618	13.4123	12.6527	14.2879	4.51233	1.08508	3.08508	3.86204	0.0501676
577	9.08481	32296.9	4.91859	-0.541497	3.52812	3.88804	8.36093	2788.45	1.20159	3000.99	1.24152	22	13	69	328	18.4378	12.9232	107049	1.42953	441.419	445.943	4.32171	10.2447	5.38694	13.0595	12.1808	13.336	4.53045	1.08508	3.08508	3.86204	0.0501676
578	12.216	36210.3	4.9666	-0.466189	3.33433	3.82705	8.70615	2721.26	1.18177	2809.34	1.23824	21	12	62	297	19.9547	14.1594	115719	1.41	422.821	474.363	4.39194	9.70961	6.04742	13.049	11.7833	13.6817	4.5173	1.08508	3.08508	3.86204	0.0501676
579	9.372	31485.4	4.82064	-0.487385	3.25367	3.88318	8.27788	2716.8	1.17161	2786.53	1.23191	25	16	66	278	19.2459	13.6817	110698	1.40378	418.888	459.526	4.25615	14.3916	5.41969	13.0931	12.7695	17.0259	4.51648	1.08508	3.08508	3.86204	0.0501676
580	11.1846	33296.4	5.12453	-0.5608	3.94097	3.85969	8.41982	2873.89	1.20811	3017.37	1.25007	22	13	65	258	21.333	15.0275	118767	1.42	444	464.595	4.35017	9.88067	5.4038	12.4801	11.2009	12.9185	4.53278	1.08508	3.08508	3.86204	0.0501676
581	10.1833	32907.5	5.18168	-0.518063	4.01512	3.9162	8.5689	2868.47	1.20643	2985.1	1.25732	23	14	67	298	21.268	15.0605	109658	1.41866	446.536	466.441	4.30614	13.9001	5.38535	16.6685	14.4099	17.9121	4.53322	1.08508	3.08508	3.86204	0.0501676
582	12.5565	34877.1	5.15441	-0.481075	3.66266	3.89634	8.17914	2799.05	1.22482	2981.35	1.24735	22	13	70	337	20.1811	14.1475	119909	1.4283	435	448.948	4.35409	7.79739	5.11076	11.5986	10.8646	11.4423	4.53001	1.08508	3.08508	3.86204	0.0501676
583	11.5043	33660.3	4.82058	-0.547885	3.74019	3.85531	8.33059	2884.89	1.22314	3040.65	1.22785	26	16	63	451	15.4195	11.0607	108510	1.39	450.743	471.434	4.20054	11.3466	5.27253	14.4005	13.5008	14.7545	4.51497	1.08508	3.08508	3.86204	0.0501676
584	11.6588	34353.8	4.80605	-0.526815	3.83145	3.88621	8.23804	2909.61	1.21847	2969.12	1.2314	25	15	60	472	16.5884	11.8523	121963	1.39978	449.357	469.145	4.26457	11.0765	5.92905	14.7426	13.3514	13.84	4.53237	1.08508	3.08508	3.86204	0.0501676
585	13.5904	37117.2	5.17657	-0.571788	4.09144	3.90685	8.28983	2911.68	1.24983	3101.89	1.26259	22	14	61	363	21.0359	15.0093	125416	1.40309	457.832	470.131	4.36853	11.1859	6.01612	15.5676	14.7259	14.8156	4.5412	1.08508	3.08508	3.86204	0.0501676
586	12.2143	34466	5.09514	-0.557429	3.97877	3.83585	8.20967	2892.65	1.22722	3037.38	1.25293	18	11	58	294	22.6314	16.1731	120003	1.4	444	470.038	4.33813	12.1718	6.0676	15.5185	14.7473	15.0125	4.51136	1.08508	3.08508	3.86204	0.0501676
591	15.0975	41348.6	4.98108	-0.668919	4.69963	3.80762	8.23494	3135.56	1.25305	3168.52	1.25216	29	19	51	462	15.1199	10.7559	127951	1.4073	477.03	469.844	4.32327	13.0853	5.66038	15.188	13.6678	13.816	4.54878	1.08508	3.08508	3.86204	0.0501676
592	6.1475	28292.3	5.24436	-0.683333	4.48128	3.99598	8.3	2995.48	1.25233	3166.75	1.27486	23	15	49	393	19.6913	13.9495	114236	1.41125	473	463.548	4.61744	10.986	5.78091	13.1766	12.169	12.4799	4.24264	1.08508	3.08508	3.86204	0.0501676
596	4.9979	24201.3	4.97964	-0.53304	4.28236	3.96909	7.896	2947.05	1.14117	3046.05	1.20122	18	12	53	400	18.4849	13.2402	106099	1.4	468.251	464.811	4.14488	8.16784	5.48176	12.7496	11.4833	12.6481	4.41783	1.08508	3.08508	3.86204	0.0501676
597	8.08781	26338.5	4.79695	-0.567939	4.22437	3.85399	7.54478	2920.51	1.17079	3124.7	1.20634	17	11	49	342	20.4542	14.542	104265	1.40563	462.981	452.499	4.00058	9.97883	6.76428	13.7697	12.6024	13.3875	4.4223	1.08508	3.08508	3.86204	0.0501676
598	9.9839	28476	4.91775	-0.573861	3.99041	3.8085	8.11798	2889.73	1.19003	3085.14	1.22301	19	12	50	374	19.1883	13.6006	105219	1.41	453.77	471.868	4.10489	11.122	6.5488	13.9345	12.4633	12.7853	4.42182	1.08508	3.08508	3.86204	0.0501676
599	11.7941	30152.1	4.97339	-0.598039	4.46074	3.73187	8.12079	3073.63	1.19962	3187.66	1.2233	17	11	52	308	21.7145	15.2527	108312	1.42	470.046	476.753	4.13507	8.52787	5.53542	12.3798	10.4084	11.5063	4.41992	1.08508	3.08508	3.86204	0.0501676
600	10.3352	28920	4.89273	-0.600291	3.98169	3.76571	8.20576	3021.56	1.19242	3152.05	1.23083	16	10	52	299	23.0036	16.3806	103101	1.40103	460	477.638	4.13851	10.0272	5.92904	12.8896	11.6759	13.558	4.42235	1.08508	3.08508	3.86204	0.0501676
601	13.7159	32803.4	4.89913	-0.664826	4.03924	3.74748	7.99137	3038.5	1.21766	3170.09	1.23259	17	11	50	317	23.7544	16.6151	108559	1.43	460	458.672	4.16122	10.3589	6.30687	14.1067	12.5985	14.5408	4.42254	1.08508	3.08508	3.86204	0.0501676
602	13.2158	32504.7	4.94729	-0.63253	4.10693	3.76129	8.16576	3035.4	1.22859	3151.76	1.2425	17	11	50	312	23.5362	16.535	107211	1.42	460.184	472.524	4.15587	11.9458	6.5688	15.266	13.7127	15.7479	4.42117	1.08508	3.08508	3.86204	0.0501676
603	15.7348	35591.1	4.87044	-0.650643	4.32468	3.65966	8.24947	3017.67	1.25099	3192.37	1.24656	21	13	55	378	20.5376	14.5749	112289	1.41	465.398	477.601	4.07075	11.7304	6.5493	15.3686	13.815	15.7055	4.42071	1.08508	3.08508	3.86204	0.0501676
604	12.3753	32023.5	4.92148	-0.612148	4.39284	3.83023	8.31199	3133.63	1.22353	3179.3	1.22717	22	14	56	455	17.5803	12.4771	111557	1.41	475.782	474.463	4.12864	11.8303	6.63702	15.4949	13.7598	15.4123	4.41926	1.08508	3.08508	3.86204	0.0501676
605	13.5935	34872.7	4.7782	-0.561374	4.22986	3.59609	8.30957	3149.43	1.23986	3194.91	1.23977	20	13	55	429	18.5438	13.1531	112343	1.40675	463.595	482.574	4.0512	11.1705	6.51692	13.1294	12.7064	13.2483	4.41664	1.08508	3.08508	3.86204	0.0501676
606	14.9906	37008.2	4.804	-0.5605	4.70041	3.62907	8.28	3172.47	1.22355	3257.34	1.23265	22	13	59	431	19.6641	14.4025	114939	1.37699	475	483.46	4.07576	9.59175	6.87874	12.3895	12.4781	12.3974	4.42553	1.08508	3.08508	3.86204	0.0501676
607	12.8672	32800.3	4.90048	-0.586905	4.59784	3.85196	8.2602	3128.13	1.23469	3202.77	1.23141	21	13	56	403	18.9029	13.5002	113728	1.4001	470.02	472.665	4.20631	12.138	7.28851	14.9092	13.5702	15.0824	4.42018	1.08508	3.08508	3.86204	0.0501676
608	12.9703	34797.8	4.91552	-0.610643	4.54534	3.61463	7.94745	3111.29	1.24195	3156.05	1.23879	24	15	51	441	16.9943	12.0099	115971	1.41557	470	472.241	4.25673	12.3082	6.95861	16.33	14.4528	16.7335	4.42488	1.08508	3.08508	3.86204	0.0501676
610	11.178	32087.5	5.04674	-0.506897	3.95	3.83664	7.67953	2805.51	1.21362	2992.31	1.24849	17	11	53	370	20.5597	14.6403	111393	1.39997	444	450.006	4.20533	6.89648	6.59935	12.247	10.7687	12.5748	4.40495	1.08508	3.08508	3.86204	0.0501676
611	10.7568	29633.9	4.71869	-0.641019	3.94223	3.71764	8.32365	2932.35	1.23408	3157.72	1.23662	18	12	49	401	19.6279	13.7593	105366	1.42671	455.968	480.914	3.92333	8.32853	7.06279	12.1749	10.6891	12.9293	4.41975	1.08508	3.08508	3.86204	0.0501676
612	14.7805	36149.4	4.74977	-0.615766	4.48553	3.64601	8.42319	3153.78	1.25175	3204.7	1.24893	21	13	54	406	18.1367	12.9506	107333	1.4	466.456	482.623	4.00854	11.8559	7.20279	17.2647	15.1284	17.7006	4.40797	1.08508	3.08508	3.86204	0.0501676
613	13.7317	35075.2	4.82332	-0.627311	4.1792	3.75536	8.18356	3143.05	1.25162	3166.9	1.24419	27	20	70	477	17.031	12.1215	116452	1.41405	465.51	469.204	4.11232	12.266	6.74165	15.0673	12.0734	15.9784	4.41501	1.08508	3.08508	3.86204	0.0501676
614	12.9953	34635.8	4.92795	-0.563636	3.92378	3.83184	7.75094	2812.73	1.24813	2985.16	1.25068	21	14	56	419	18.2109	12.7936	118300	1.42036	441.438	450.629	4.14344	12.0488	7.10344	17.3796	15.2894	18.0033	4.39794	1.08508	3.08508	3.86204	0.0501676
615	13.0782	34935.1	4.77901	-0.586321	3.79623	3.87198	8.19241	3006.62	1.23321	3085.07	1.2486	19	12	56	407	18.8885	13.2154	122438	1.43	448	467.358	4.14949	10.5387	6.97858	14.9669	12.2217	16.3339	4.40551	1.08508	3.08508	3.86204	0.0501676
616	13.6487	35725.2	4.74234	-0.600718	3.88062	3.58541	7.78182	2947.2	1.24736	3116.33	1.2349	21	13	54	414	18.6016	13.2929	115579	1.4	448.562	466.256	4.08633	12.0635	6.95287	17.0907	14.1257	18.3679	4.42256	1.08508	3.08508	3.86204	0.0501676
617	14.92	37579	4.71869	-0.572523	4.3268	3.68163	8.50946	3183.57	1.25849	3217.66	1.25053	23	15	55	427	17.6026	12.5876	113540	1.4	463.98	484.02	4.0332	13.0761	7.01022	17.837	15.8335	18.4651	4.41279	1.08508	3.08508	3.86204	0.0501676
618	15.265	37897.3	4.72799	-0.52735	4.59744	3.66508	8.45679	3265.86	1.28737	3279.41	1.26168	24	15	57	438	16.7481	11.9707	115490	1.39977	475.007	481.451	4.02111	12.9957	6.65706	15.5276	14.7467	15.8531	4.42775	1.08508	3.08508	3.86204	0.0501676
619	14.5849	36564.2	4.81924	-0.565324	4.47539	3.71513	8.62177	3202.49	1.28576	3231.61	1.26335	23	15	56	405	17.6458	12.5456	114137	1.40749	470.596	485.369	4.10592	14.6123	6.99225	17.5956	15.6997	18.5655	4.41987	1.08508	3.08508	3.86204	0.0501676
620	13.5535	38686.9	5.00228	-0.595096	4.29653	3.86503	7.93613	3030.25	1.27161	3067.01	1.24967	34	22	56	474	11.4128	8.12032	128472	1.40223	453.681	454.494	4.26295	7.31456	6.11553	10.5643	9.47262	11.5391	4.43162	1.08508	3.08508	3.86204	0.0501676
621	13.6915	36836.4	4.86076	-0.612025	4.02975	3.85635	7.61096	2962.53	1.24382	3114.98	1.2306	22	14	57	394	16.7424	11.8125	122836	1.40643	456.717	431.916	4.24694	7.40066	6.12295	10.7985	9.60252	11.8589	4.4188	1.08508	3.08508	3.86204	0.0501676
622	13.9758	39101	4.83581	-0.597458	3.99873	3.83094	7.71346	2973.01	1.2345	3122.32	1.22815	23	15	56	395	16.7327	11.968	119704	1.40063	456.678	439.231	4.22019	7.67214	6.46544	12.3679	10.6742	13.6803	4.41984	1.08508	3.08508	3.86204	0.0501676
623	11.5194	36274.1	4.65233	-0.58	4.56083	3.66854	8.51374	3266.45	1.23868	3269.09	1.2169	26	17	52	479	13.8324	9.89066	124679	1.4	483.592	490.908	3.95967	6.65731	6.54223	12.481	11.2611	11.9473	4.40633	1.08508	3.08508	3.86204	0.0501676
624	14.0368	35751	4.68333	-0.573111	4.67344	3.63974	8.34835	3181.03	1.23825	3213.51	1.22792	24	16	56	367	17.0526	12.2379	118707	1.38978	475.639	483.205	4.012	12.9574	6.62482	15.7741	13.7468	17.4257	4.42087	1.08508	3.08508	3.86204	0.0501676
625	13.347	37954.4	4.7939	-0.582944	4.05206	3.81585	7.93926	3094.29	1.25409	3070.87	1.22296	33	20	56	449	14.3553	10.2741	119221	1.4007	456.506	458.756	4.15199	12.785	6.68473	16.3283	14.3718	18.0351	4.4179	1.08508	3.08508	3.86204	0.0501676
626	14.4544	39093.9	4.82177	-0.539919	4.08629	3.86013	7.80332	2985.78	1.23609	3100.98	1.22214	27	17	56	417	15.1601	10.8332	117283	1.4	456.774	453.259	4.23575	13.8319	6.90564	17.6436	15.4552	18.1372	4.41977	1.08508	3.08508	3.86204	0.0501676
627	13.3484	37832.3	4.85698	-0.534226	4.22218	3.89354	7.97008	3024.76	1.24463	3107.72	1.21978	29	19	56	444	14.1613	10.0046	122837	1.41921	461.22	457.682	4.26685	12.0799	5.51311	12.7525	11.7329	12.5902	4.42618	1.08508	3.08508	3.86204	0.0501676
628	14.9325	39624.2	4.69788	-0.522246	4.51993	3.65297	8.07867	3177.04	1.24576	3209.28	1.22437	25	16	54	360	16.7042	11.9383	119863	1.4	466.551	473.54	4.07404	13.9292	5.82148	15.4893	13.093	16.0987	4.41011	1.08508	3.08508	3.86204	0.0501676
629	14.4952	37508.1	4.70563	-0.553463	4.23593	3.65276	8.33298	3171.53	1.2559	3186.22	1.23152	28	18	57	328	16.5403	11.8358	116400	1.40111	468.394	481.595	4.06584	13.1427	5.60358	15.2591	12.7372	16.7162	4.41991	1.08508	3.08508	3.86204	0.0501676
630	14.7166	39095.1	4.81593	-0.573519	4.72519	3.79252	8.52962	3251.02	1.23252	3247.68	1.21725	25	15	57	383	14.4531	10.2501	123763	1.41	488.902	485.183	4.14666	7.53442	5.36667	11.5563	10.4887	12.1132	4.40896	1.08508	3.08508	3.86204	0.0501676
631	15.2928	40281.2	4.9626	-0.537381	5.00313	3.78967	8.51534	3235.93	1.22615	3256.98	1.21495	26	16	56	390	14.3291	10.1446	120418	1.41798	488.51	485.565	4.16433	10.7862	5.60658	14.0558	12.7903	14.8056	4.42199	1.08508	3.08508	3.86204	0.0501676
632	14.6481	38886.6	4.82185	-0.541597	4.63571	3.78166	8.50121	3215.27	1.23298	3224.09	1.21653	25	16	57	352	16.1841	11.4543	120009	1.41621	484.462	484.676	4.18261	10.9352	5.76737	13.5507	13.2106	13.6768	4.41228	1.08508	3.08508	3.86204	0.0501676
633	14.9943	38414.6	4.63461	-0.546076	4.58632	3.63765	8.56418	3282.82	1.22985	3298.56	1.21428	26	16	56	336	15.6735	11.1796	112690	1.4008	484.126	491.217	3.99955	12.799	6.26079	15.2139	13.3219	16.4473	4.4182	1.08508	3.08508	3.86204	0.0501676
634	15.3178	38135.1	4.75152	-0.553753	4.50304	3.67241	8.62207	3232.59	1.24178	3263.61	1.22718	23	15	43	356	15.8038	11.2565	117442	1.4058	479.289	490.702	4.03654	12.2677	5.97514	13.7544	11.0948	15.7096	4.41477	1.08508	3.08508	3.86204	0.0501676
635	16.3618	40908.5	4.76859	-0.542058	5.14658	3.64449	8.75804	3335.15	1.26348	3332.8	1.23111	26	16	50	418	14.0677	9.9433	119692	1.41887	491.568	493.749	4.06537	10.7607	5.79838	14.1374	13.1851	15.3147	4.42392	1.08508	3.08508	3.86204	0.0501676
636	15.3644	38682.6	4.81221	-0.574237	4.80393	3.8283	8.46148	3222.34	1.25648	3225.21	1.22224	31	20	57	393	15.0341	10.7104	114936	1.40516	479.291	479.564	4.1404	12.5066	7.39189	15.6661	14.4896	16.2993	4.42341	1.08508	3.08508	3.86204	0.0501676
637	15.9203	40329.4	4.86015	-0.557356	3.96089	3.87239	8.23865	2942	1.23373	3033.8	1.21448	29	18	50	388	14.2291	9.88543	123382	1.44627	451.606	457.853	4.20558	11.1619	6.92193	14.6581	13.9388	14.7133	4.42312	1.08508	3.08508	3.86204	0.0501676
638	15.7507	40562.3	4.84577	-0.597007	3.92042	3.9119	8.09623	2938	1.22535	3037.91	1.20813	30	19	46	362	13.3414	9.54093	126667	1.40007	448.511	460.981	4.1571	12.3524	6.23634	13.5275	12.6098	12.5216	4.41723	1.08508	3.08508	3.86204	0.0501676
639	15.358	37583.2	4.67558	-0.613474	4.71642	3.61441	8.17604	3304.81	1.2262	3307.89	1.21209	25	15	47	344	17.3613	12.3156	122910	1.41	491	482.917	3.92969	10.9246	5.28876	13.072	11.6408	13.3221	4.41437	1.08508	3.08508	3.86204	0.0501676
640	14.7559	37355.5	4.63559	-0.621017	4.69881	3.69665	8.34064	3307.26	1.23569	3301.57	1.21118	25	15	43	419	14.1485	10.1324	118322	1.4	491	480.907	3.94698	10.2734	5.13664	14.3713	11.8371	14.3551	4.41647	1.08508	3.08508	3.86204	0.0501676
641	13.5568	34579.7	4.61698	-0.585908	4.74414	3.65427	8.3779	3322.11	1.22626	3333.6	1.21446	24	15	42	417	14.4885	10.3137	114299	1.40406	491	482.168	3.93181	10.4208	5.40023	15.6564	13.8336	14.8577	4.42037	1.08508	3.08508	3.86204	0.0501676
642	15.5704	39365	4.77192	-0.61133	4.6908	3.84425	8.46671	3268.4	1.25535	3259.92	1.22392	29	18	49	447	13.88	9.81759	120165	1.41687	482.071	477.635	4.08219	10.5039	4.96704	14.9831	11.749	14.7907	4.41332	1.08508	3.08508	3.86204	0.0501676
646	12.0998	33205.5	4.71824	-0.561845	3.67379	3.96782	8.45381	2965.44	1.18827	3023.25	1.20202	21	14	45	343	18.1355	12.914	120592	1.40161	442.22	478.721	4.19522	8.21481	4.49044	11.1272	10.4859	10.5293	4.41201	1	3	3.87818	0.0570379
647	12.8304	35743.4	4.73409	-0.510609	3.63341	3.89069	8.50428	2848.28	1.19483	3001.28	1.20671	18	12	51	310	19.0685	13.5093	114537	1.41	434.79	479.773	4.19938	7.77547	4.50296	12.7631	11.8237	12.6942	4.41334	1	3	3.87818	0.0570379
648	15.7101	39926	4.76222	-0.472593	3.45457	3.85438	8.6776	2766.19	1.20642	2934.6	1.21528	17	11	43	310	20.0658	14.2354	115789	1.41	421.306	484.045	4.23941	9.42892	4.69121	13.6161	12.559	12.834	4.41368	1	3	3.87818	0.0570379
649	11.7179	34915.2	4.61222	-0.547094	4.64609	3.57355	8.23868	3288.18	1.22581	3331.24	1.21179	19	12	42	400	17.0871	12.2031	110469	1.4	487.585	487.122	3.91694	11.0948	4.4764	13.7811	12.6899	14.0037	4.41508	1	3	3.87818	0.0570379
650	15.9262	40797.4	4.69039	-0.526176	4.79632	3.60742	8.37083	3292.01	1.24327	3322.68	1.22254	22	14	42	396	16.4902	11.7511	118025	1.40428	487.072	482.975	3.99368	11.5409	4.54421	14.867	13.361	14.8916	4.4237	1	3	3.87818	0.0570379
651	15.023	39601.8	4.77764	-0.517851	5.04523	3.70757	8.53914	3341.3	1.26421	3330.26	1.22244	27	17	49	477	14.7724	10.608	116994	1.3959	496.141	484.125	4.02533	10.998	4.77864	15.7714	14.3045	15.1106	4.41723	1	3	3.87818	0.0570379
652	14.8729	40676.6	4.81459	-0.537549	3.90798	3.89695	8.43499	3112.95	1.25963	3086.45	1.21312	34	21	46	423	15.1353	10.7689	121156	1.40397	464.451	471.965	4.14427	9.48519	4.57315	13.5157	12.2452	12.8868	4.41886	1	3	3.87818	0.0570379
657	10.9192	31414.7	4.85677	-0.530568	3.97009	4.13712	7.96883	2975.91	1.17883	3042.51	1.1596	22	14	48	332	18.5512	13.1016	115601	1.41895	458.063	455.95	4.28578	6.37317	4.42084	10.1925	9.49832	10.5876	4.58827	1	3	3.87818	0.0570379
658	10.7989	33876.4	4.9369	-0.503621	4.36552	4.11918	8.72884	2989.84	1.18807	3111.44	1.16887	30	20	49	510	14.0176	9.9946	113230	1.40227	468.721	484.56	4.35709	8.80261	4.72191	12.9092	11.9656	12.975	4.60005	1	3	3.87818	0.0570379
659	13.33	37257.7	4.91685	-0.511111	4.44892	4.1	8.45864	3141.63	1.22163	3129.29	1.18093	30	20	54	411	14.2939	10.1873	116260	1.40502	479.944	471.484	4.32546	7.89199	4.88182	12.1534	11.4517	11.5443	4.59971	1	3	3.87818	0.0570379
660	8.60626	29210.6	4.82263	-0.473457	3.65473	4.0622	8.53983	2893.91	1.14175	3026.71	1.16168	28	19	52	362	18.1568	12.9597	114190	1.40049	456.251	485.29	4.27536	6.23422	5.49727	9.98044	9.57317	11.0631	4.56988	1	3	3.87818	0.0570379
672	13.4414	38559.8	5.23354	-0.517917	4.22458	4.00309	8.48213	2933.46	1.20418	3052.34	1.18561	25	17	58	300	17.1411	12.2003	125053	1.41162	464.474	478.448	4.35941	7.49245	4.53598	10.5495	9.44247	10.3507	4.5711	1	3	3.87818	0.0570379
673	12.6884	39660.5	5.19634	-0.51869	4.26975	4.02921	8.5146	2976.23	1.21717	3086.51	1.18936	25	16	49	293	15.6297	11.1725	124057	1.40002	462.59	477.095	4.28342	9.40663	4.64712	12.574	11.4463	12.284	4.58935	1	3	3.87818	0.0570379
674	14.469	41103.9	5.20625	-0.495968	4.50444	3.88937	8.71512	3056.02	1.23264	3169.06	1.19146	24	16	46	296	16.0106	11.4377	124546	1.4	477.947	489.334	4.21661	10.8752	4.68378	13.5133	11.8635	13.8206	4.60181	1	3	3.87818	0.0570379
675	14.1989	42997.5	5.22535	-0.533071	4.67969	3.8585	8.58444	3244.52	1.25108	3211.55	1.19696	35	22	49	413	12.8921	9.23178	123082	1.4	485.603	483.933	4.20613	11.0719	4.4083	13.9485	11.9741	14.4587	4.60572	1	3	3.87818	0.0570379
676	13.0324	42167.9	5.37675	-0.510085	4.53607	3.99606	8.37859	3218.2	1.26727	3192.89	1.20947	37	23	51	390	13.2017	9.45366	126207	1.4	474.544	469.246	4.35393	9.44731	4.45594	12.7662	11.3479	12.6765	4.60327	1	3	3.87818	0.0570379
677	12.9181	41237.9	5.11876	-0.519576	4.02724	4.01841	8.14825	3056.83	1.23898	3047.3	1.19738	41	26	55	376	13.2672	9.45228	125022	1.40671	451.613	460.438	4.21433	10.1329	4.33326	12.8785	11.3533	11.6493	4.51548	1	3	3.87818	0.0570379
678	14.5552	42172.5	5.08773	-0.529448	4.1182	3.73761	8.27841	3031.58	1.24887	3141.8	1.19976	30	19	53	304	16.0452	11.0165	126107	1.46926	458	477.162	4.08962	7.73811	4.2051	10.215	8.6722	10.0851	4.26349	1	3	3.87818	0.0570379
679	13.9362	41330.4	5.00459	-0.519415	4.25637	3.78623	8.6241	3035.83	1.23317	3160.32	1.19135	25	16	44	323	16.3177	10.8943	121039	1.49998	461.994	489.239	4.05158	10.4257	4.88871	14.3187	12.1504	13.7372	4.24486	1	3	3.87818	0.0570379
680	14.1491	42438.7	5.06945	-0.5343	4.60341	3.71842	8.52968	3234.89	1.24858	3201.39	1.19576	35	22	50	398	13.4745	8.9699	119953	1.5001	481.255	486.02	4.00067	10.2814	4.45353	14.4836	12.4402	13.8177	4.28326	1	3	3.87818	0.0570379
683	9.36029	28990.7	4.89157	-0.550602	3.99711	3.80159	8.19225	2955.83	1.15598	3094.61	1.15822	19	11	56	352	19.4799	16.1722	110957	1.2	464.632	482.555	4.15005	5.99135	5.42305	12.6325	12.0036	12.9133	4.41205	1	3	3.87818	0.0570379
684	10.0698	30603	5.06172	-0.555729	3.78305	3.69421	8.45794	2800.81	1.16051	2744.87	1.20185	17	11	53	296	20.826	17.2322	112411	1.21	441.727	490.163	4.21411	5.27357	6.08249	12.4615	12.0954	13.4027	4.4263	1	3	3.87818	0.0570379
685	11.0463	29833	5.06195	-0.522081	3.90318	3.78577	8.25839	2842.98	1.16899	2940.54	1.176	18	11	58	307	21.0306	17.2849	110517	1.22	448.847	480.025	4.19512	6.02217	6.0099	12.194	11.1132	13.472	4.41647	1	3	3.87818	0.0570379
686	12.5637	32017.9	5.16558	-0.554472	3.73117	3.62729	8.20089	2772.56	1.18883	2903.07	1.18259	18	12	54	277	20.6253	16.9107	111383	1.22	440.856	480.781	4.17542	6.68367	5.61478	12.8806	9.38591	13.9564	4.41655	1	3	3.87818	0.0570379
687	11.6484	34047.2	5.03732	-0.563146	3.89272	3.68801	8.45319	2870.7	1.21058	3036.23	1.17169	29	18	56	430	18.4994	15.3704	113733	1.2	457.609	489.097	4.0556	7.95322	6.1929	14.8567	13.7762	14.665	4.39889	1	3	3.87818	0.0570379
688	11.5013	31931.8	4.77143	-0.548848	4.0235	3.51195	8.41195	2975.95	1.20788	3114.65	1.16352	24	15	54	414	18.3139	15.2034	109655	1.2	454.171	495.581	3.95427	8.70659	5.61862	14.6476	15.1643	15.2656	4.40502	1	3	3.87818	0.0570379
689	14.649	35643.1	4.85069	-0.599211	3.92544	3.59024	8.09041	2952.69	1.21008	3047.61	1.16505	25	16	54	532	15.7665	13.0891	127343	1.2	450.848	478.584	4.06376	6.5394	6.25061	13.138	12.7425	12.8645	4.42064	1	3	3.87818	0.0570379
690	13.1756	34262.2	5.18928	-0.568329	3.76783	3.63395	8.58498	2829.37	1.21785	2966.94	1.1969	20	12	56	355	20.0502	14.8593	121983	1.34706	439.546	488.735	4.22994	6.40287	5.1545	13.0762	12.4349	13.236	4.4254	1	3	3.87818	0.0570379
691	11.9795	33470.3	4.95565	-0.533884	3.27107	3.59636	8.50364	2728.72	1.2293	2910.94	1.2075	18	11	52	295	22.1025	16.3902	114618	1.35	413.339	486.398	4.12989	6.43884	6.37528	13.6855	13.3166	12.6999	4.42025	1	3	3.87818	0.0570379
692	14.1196	36274.9	5.00415	-0.540732	3.48146	3.65191	8.30161	2780.07	1.22721	2935.45	1.19302	19	12	56	401	19.2443	14.1813	120447	1.36	425.92	477.668	4.20307	5.78527	5.60884	14.5285	13.6216	14.2418	4.40644	1	3	3.87818	0.0570379
693	12.4969	32740.9	5.14897	-0.554253	4.22483	3.55019	8.5642	3105.54	1.25129	3165.83	1.19716	24	15	54	353	18.4282	13.5884	114633	1.36	470.311	495.301	4.02508	7.08333	6.28901	13.6642	13.0117	13.8827	4.41101	1	3	3.87818	0.0570379
694	9.75987	30881.4	4.8501	-0.528515	4.10752	3.63268	8.49232	3073.14	1.2046	3090.12	1.181	27	19	53	418	16.0209	11.8935	112918	1.35	463.263	492.118	4.04099	9.58887	6.63369	14.6688	13.8754	14.835	4.41376	1	3	3.87818	0.0570379
695	11.959	32327.3	4.97126	-0.478621	3.97287	3.50436	8.33182	2883.43	1.20542	3068.15	1.17674	24	15	54	371	18.717	13.8886	113129	1.35	459.839	491.979	4.10934	8.25882	6.08733	15.5912	14.7171	13.8984	4.42567	1	3	3.87818	0.0570379
696	12.556	33997.1	5.29177	-0.491022	3.61272	3.40206	7.90309	2801.96	1.23324	2917.19	1.21267	19	12	55	308	20.2535	15.0409	119729	1.3501	428	470.632	4.19028	6.75265	6.54221	11.9192	11.4479	12.6597	4.42186	1	3	3.87818	0.0570379
697	13.0474	34711.7	5.18162	-0.500279	3.46351	3.34828	8.25402	2803.39	1.24672	2928.51	1.22508	17	11	55	295	22.3669	16.4851	119435	1.36002	422	486.021	4.21434	6.72019	6.83001	12.7764	12.4871	13.3681	4.41893	1	3	3.87818	0.0570379
698	15.1032	37868.4	5.1694	-0.494279	3.55348	3.42971	7.68689	2739.53	1.24549	2903.34	1.19973	18	11	53	329	20.1391	14.9197	119485	1.35	422	461.211	4.12614	7.59744	5.27735	12.4666	10.6209	13.5107	4.41801	1	3	3.87818	0.0570379
699	10.9223	32032.3	5.07069	-0.521767	4.26199	3.32948	8.46075	2985.11	1.24466	3035.89	1.20204	24	15	54	404	17.1195	12.8064	108519	1.34016	454.762	494.444	4.03	7.05881	5.88333	12.4873	11.3055	13.1958	4.42118	1	3	3.87818	0.0570379
700	12.9039	37038.5	5.18062	-0.517917	4.47021	3.3366	8.43746	3162.03	1.26039	3179.27	1.19939	24	16	56	402	17.1952	12.7471	117630	1.35	467.448	494.761	4.08214	6.14445	5.17676	12.0077	10.4271	11.9892	4.42048	1	3	3.87818	0.0570379
701	15.0609	40295.4	5.06599	-0.505263	4.07713	3.25943	8.34324	3044.61	1.27653	3135.28	1.20734	26	16	55	416	16.6104	12.2321	119272	1.36	459.078	489.302	4.05377	8.52112	5.87805	12.3511	10.3871	12.9951	4.42256	1	3	3.87818	0.0570379
702	13.9669	37316.7	5.06991	-0.53578	4.37945	3.25658	8.35477	3213.59	1.26955	3217.54	1.19963	30	18	62	492	14.9405	11.0961	117641	1.35	475.893	498.018	4.03352	7.44174	5.42892	11.5571	10.8914	13.4663	4.43756	1	3	3.87818	0.0570379
703	14.7388	41050.9	5.16531	-0.531224	3.90878	3.42189	7.87323	2888.8	1.24486	3000.74	1.19344	24	15	56	396	16.6574	12.3567	122625	1.35	446.616	470.387	4.15929	7.56077	5.96583	11.8186	10.5266	13.0926	4.43438	1	3	3.87818	0.0570379
704	13.9562	39654.6	5.00074	-0.480893	3.17568	3.45615	7.92193	2620.52	1.22298	2781.45	1.21741	19	12	54	325	19.9633	14.7992	120664	1.35008	410	466.51	4.18547	8.31911	6.14855	12.7402	11.3662	13.5156	4.42525	1	3	3.87818	0.0570379
705	14.3114	39333	5.10423	-0.484507	3.19831	3.38837	7.92465	2591.28	1.21655	2777.43	1.22418	17	10	54	292	22.0028	16.3528	118343	1.34702	408	469.042	4.16491	7.43419	5.73486	13.0849	11.274	13.6642	4.4232	1	3	3.87818	0.0570379
706	11.3793	35542.7	5.11013	-0.540928	3.45253	3.4033	8.02226	2745.79	1.2409	2941.63	1.19615	22	14	51	390	16.9997	12.6103	115950	1.35	422.388	477.374	4.11233	7.10266	5.47456	13.6695	12.5212	12.6575	4.41891	1	3	3.87818	0.0570379
707	11.2021	35341.3	5.0446	-0.552342	4.03198	3.57076	8.49126	3009.76	1.23983	3035.2	1.19618	22	14	55	430	16.7474	12.4232	114492	1.35	450.544	487.647	4.04227	7.86086	5.28941	13.3011	12.4184	13.0955	4.41822	1	3	3.87818	0.0570379
708	11.4298	34135.1	5.16043	-0.555484	4.1671	3.66791	8.61809	3059.09	1.25446	3086.68	1.20503	22	14	54	406	17.1454	12.572	117807	1.36704	461.241	491.048	4.11143	6.33059	5.12589	12.1737	11.8392	11.7061	4.42052	1	3	3.87818	0.0570379
709	10.6069	32252.1	5.00495	-0.560149	3.86064	3.80122	8.72469	2839.41	1.21414	3023.03	1.21521	17	11	57	349	20.6971	14.8027	116306	1.40006	446.748	490.822	4.12055	7.08976	4.53064	11.3995	10.378	12.32	4.42774	1	3	3.87818	0.0570379
710	11.652	33319.3	4.97947	-0.510933	3.4552	3.79451	8.64176	2750.57	1.22497	2923.46	1.21038	18	10	58	292	20.8943	14.8167	116184	1.41	428.138	483.925	4.16071	6.22233	5.01769	11.194	10.0845	9.45777	4.40977	1	3	3.87818	0.0570379
712	10.8595	30025.5	5.04424	-0.512332	3.45496	3.76416	8.40664	2688.74	1.21146	2760.34	1.21366	17	10	55	290	22.146	15.8239	112331	1.4	423	476.215	4.12628	5.9434	4.29377	11.3023	9.88399	10.5418	4.41816	1	3	3.87818	0.0570379
713	10.6223	30902.7	5.09104	-0.552985	4.37612	3.70041	8.71721	2961.63	1.20906	3088.04	1.18821	18	11	53	319	19.6527	14.0363	110573	1.4	474.377	495.514	4.01513	5.52108	4.21439	10.5949	10.0043	10.8154	4.40934	1	3	3.87818	0.0570379
714	9.87706	30256	4.98437	-0.511954	4.13126	3.76117	8.79299	2933.91	1.20796	3063.04	1.19415	18	11	54	351	18.6025	13.2564	109429	1.4	458	494.011	4.11621	7.62851	5.15069	11.5502	11.2505	11.877	4.41429	1	3	3.87818	0.0570379
715	10.7395	31593.7	5.02266	-0.54064	4.28424	3.57236	8.72663	2984.58	1.24053	3097.25	1.19966	20	12	53	391	19.7329	14.2079	110944	1.4	461.653	495.278	3.98252	7.74156	4.40825	11.8878	9.9178	11.0654	4.41169	1	3	3.87818	0.0570379
716	12.7201	36146.5	5.18596	-0.534236	4.35493	3.24187	8.52378	3012.78	1.25869	3140.7	1.2026	18	11	52	386	19.7343	14.0835	115608	1.40339	459.975	494.97	4.05113	7.84344	4.68501	11.0074	10.8912	11.4603	4.41579	1	3	3.87818	0.0570379
717	12.8787	35220.7	4.97047	-0.510864	3.21783	3.4292	8.23448	2690.08	1.24734	2767.73	1.20789	18	10	58	374	22.7552	16.1657	118169	1.40959	409.983	483.267	4.14279	6.90209	5.15617	11.5948	10.9843	11.6909	4.41058	1	3	3.87818	0.0570379
718	12.0872	34687.8	5.08857	-0.504857	3.48714	3.41958	8.82429	2663.01	1.22168	2832.47	1.23082	18	11	55	351	22.9146	16.4335	112931	1.39644	422	502.965	4.19232	8.02279	5.13038	12.5875	11.5705	12.2492	4.42044	1	3	3.87818	0.0570379
719	12.6351	34232.8	5.09714	-0.530857	3.68657	3.38656	8.34882	2768.54	1.24076	2914.37	1.20103	17	11	55	369	22.3061	15.8198	116231	1.41	434.466	490.521	4.10753	6.91282	4.97048	11.7749	11.2291	11.6771	4.41778	1	3	3.87818	0.0570379
720	11.3837	32637.4	5.11658	-0.530198	4.01658	3.22265	8.55408	2861.61	1.23032	3046.7	1.19821	20	12	54	500	19.6957	13.972	110435	1.41	447.525	506.516	4.088	8.24992	4.5637	13.391	12.3312	13.4439	4.41694	1	3	3.87818	0.0570379
721	10.9787	34331.3	5.26856	-0.528384	4.90437	3.24604	8.56763	3080.07	1.24475	3180.51	1.19244	19	11	54	541	18.1594	12.9759	112133	1.39998	486.327	505.52	4.02999	7.81225	4.65109	13.4435	12.9492	13.6848	4.41737	1	3	3.87818	0.0570379
722	10.1858	31692.5	5.11125	-0.500489	4.58949	3.50343	8.91109	3107.95	1.23517	3133.48	1.19391	18	11	54	518	19.0292	13.6617	107995	1.39254	476.312	509.738	3.98992	9.96789	4.75065	14.7165	14.195	14.8933	4.41933	1	3	3.87818	0.0570379
723	10.9019	33661.6	5.05509	-0.531481	4.22917	3.64466	8.80668	2938.89	1.238	3081.31	1.19728	18	11	55	516	18.9977	13.4777	112018	1.41	458.477	496.552	4.0297	8.76473	5.37433	13.3101	12.9015	13.2479	4.41873	1	3	3.87818	0.0570379
724	9.87819	31139	4.91638	-0.519851	4.27543	3.34344	8.48504	2945.9	1.21703	3130.3	1.18165	18	11	53	466	19.7836	14.0693	107202	1.40678	469.24	505.092	4.00065	7.08536	4.66259	10.3725	10.048	10.6099	4.42341	1	3	3.87818	0.0570379
725	11.959	35115.5	5.12451	-0.531268	3.84789	3.39443	8.34107	2848.48	1.23419	2940.01	1.19679	17	11	54	394	22.0339	15.7794	114032	1.40037	441.032	489.311	4.15578	6.71785	5.32186	11.5006	10.7402	11.8589	4.40995	1	3	3.87818	0.0570379
726	11.8827	32866.2	5.1724	-0.497033	3.66528	3.7326	8.86078	2719.8	1.23266	2891.95	1.21564	17	10	55	380	23.588	16.7672	113132	1.41206	430.214	491.657	4.18334	8.36492	5.7126	12.1699	11.5452	12.3011	4.40817	1	3	3.87818	0.0570379
727	11.368	34076.3	5.10319	-0.478551	3.54464	3.68589	8.78325	2714.01	1.22318	2920.67	1.21232	15	9	57	358	24.0311	16.9658	114176	1.42	423.533	490.995	4.14027	7.76681	5.79084	12.3281	10.7584	12.3086	4.40383	1	3	3.87818	0.0570379
728	10.7446	32408.6	5.02125	-0.468557	3.45	3.63892	8.96005	2677.2	1.22052	2901.47	1.22255	15	9	54	374	24.4534	17.4129	113006	1.40307	421.734	499.549	4.17413	6.38445	5.77363	12.2591	11.8804	12.1143	4.4167	1	3	3.87818	0.0570379
729	10.4937	31835.7	5.10227	-0.54051	4.32011	3.63902	9.1486	2998.69	1.21427	3092.49	1.20587	16	10	55	446	22.7558	16.2266	111344	1.39997	468	511.075	4.11474	8.12047	6.30005	12.8985	12.1788	12.69	4.41195	1	3	3.87818	0.0570379
730	10.8824	32245.8	5.0016	-0.524599	4.13182	3.56821	8.81457	3004.51	1.23702	3091.24	1.19451	17	10	55	437	21.5817	15.4528	109658	1.4	459.099	501.918	3.9977	8.70704	6.00455	13.1249	12.3256	12.8948	4.41279	1	3	3.87818	0.0570379
731	10.7428	32720	5.13452	-0.518082	4.27342	3.5862	9.0095	2915.4	1.24971	3079.3	1.21523	18	13	54	448	21.9633	15.693	114053	1.40007	458.808	507.199	4.11486	8.59386	5.67497	12.5372	11.6243	12.64	4.41708	1	3	3.87818	0.0570379
732	11.7258	33574.6	4.98927	-0.522251	4.45183	3.53823	9.17538	3026.67	1.25688	3193.26	1.21424	15	9	53	459	21.111	15.0784	114041	1.4	463.359	513.387	4.00519	7.52938	5.72026	12.5087	11.7885	12.1982	4.4175	1	3	3.87818	0.0570379
733	12.5803	36604.1	5.31463	-0.534146	4.69919	3.71969	8.68412	3108.12	1.26266	3139.56	1.2025	20	12	51	439	21.9031	15.5166	114908	1.41477	475	492.358	4.11817	8.14158	4.95458	12.0128	11.3572	12.5036	4.41361	1	3	3.87818	0.0570379
734	11.3505	34449.6	5.1341	-0.523699	3.9957	3.76372	8.73198	2702	1.22419	2904.93	1.21927	16	10	55	383	23.0389	16.4585	114979	1.4	443.368	490.387	4.10399	7.38808	5.45601	11.5383	11.0065	11.9821	4.40634	1	3	3.87818	0.0570379
735	12.2914	35697.1	5.16156	-0.465	3.75549	3.77429	8.57714	2777.88	1.24451	2961.93	1.2037	15	9	55	394	23.6988	16.8719	116603	1.40614	434.376	482.452	4.09842	6.91684	5.44581	10.8799	10.4977	11.7143	4.41622	1	3	3.87818	0.0570379
736	13.0356	36329	5.15638	-0.543323	3.86795	3.70172	8.57941	2875.48	1.23931	2991.43	1.19826	15	9	53	382	23.687	16.9223	116480	1.4	441.116	487.944	4.14423	7.24236	5.88757	10.6332	11.5125	12.2857	4.40539	1	3	3.87818	0.0570379
737	11.4846	35302.9	5.18864	-0.532071	4.01759	3.71468	8.29523	2819.72	1.24383	2940.6	1.19425	22	13	54	493	17.976	12.8002	118137	1.40778	451.664	475.165	4.13682	6.95874	5.7451	11.1982	10.4678	10.9134	4.41793	1	3	3.87818	0.0570379
738	10.3125	31843.4	4.99088	-0.520107	4.38901	3.50708	8.83009	2987.52	1.24163	3143.7	1.1987	15	9	52	438	21.5675	15.2341	105346	1.42	464.054	505.292	3.90167	8.68155	5.79322	12.7763	11.3445	12.7603	4.4153	1	3	3.87818	0.0570379
739	10.664	30734.5	5.17235	-0.546369	4.97849	3.58871	9.0053	3185.32	1.25317	3229.21	1.20091	17	10	54	411	22.2627	15.941	110783	1.4	491.873	509.235	3.97455	7.4177	5.80967	12.8749	11.6779	12.4988	4.42155	1	3	3.87818	0.0570379
740	11.6014	34475.1	5.08209	-0.513369	4.40348	3.59692	8.79846	3083.86	1.25681	3146.72	1.20864	16	9	51	468	21.9231	15.6965	112970	1.4	458.401	500.604	3.96363	7.87179	5.03646	12.5183	11.124	12.013	4.4233	1	3	3.87818	0.0570379
741	13.1425	36814.4	5.25769	-0.51511	4.60852	3.55226	9.07014	3022.85	1.27911	3203.79	1.214	17	11	48	423	22.2414	15.7898	115582	1.40874	464.992	507.658	4.01311	9.43623	5.00867	13.3324	10.8872	12.9706	4.42191	1	3	3.87818	0.0570379
742	13.6429	38816.1	5.46145	-0.529888	5.31359	3.60599	9.03272	3192.79	1.28684	3254.34	1.21312	17	11	55	436	22.8977	15.9947	116429	1.43516	488.385	507.355	4.04986	7.4795	5.26309	12.7254	11.0211	11.5492	4.44021	1	3	3.87818	0.0570379
743	14.0913	41059.2	5.32961	-0.535844	3.73974	3.58373	8.38137	2979.2	1.2961	3036.36	1.21692	22	15	54	446	20.4109	14.4133	120770	1.41927	427.831	467.109	4.13571	7.77169	5.3588	12.2962	10.3136	12.2836	4.43028	1	3	3.87818	0.0570379
744	10.5654	35632.3	5.18994	-0.500838	3.45978	3.49816	8.15323	2607.55	1.2284	2777.44	1.21017	16	10	54	368	22.4251	15.9083	119308	1.41	418.511	467.813	4.13545	7.95356	5.34791	12.1434	10.5967	11.5652	4.41517	1	3	3.87818	0.0570379
745	12.7963	36030.4	5.11089	-0.436175	3.46201	3.30138	8.19378	2700.64	1.22519	2835.08	1.20373	15	9	55	380	22.5244	16.0336	113536	1.40631	418.813	485.634	4.01111	6.93094	5.4373	13.0796	11.1816	12.2069	4.41414	1	3	3.87818	0.0570379
746	11.5329	36941.3	5.22559	-0.519843	4.3248	3.52716	9.08384	2888.53	1.25071	3061.97	1.20671	17	11	56	475	21.1446	14.8963	112607	1.42009	464.963	510.284	4.01515	8.74243	5.61446	14.7467	11.7915	13.9584	4.41047	1	3	3.87818	0.0570379
747	12.0699	36270.7	5.27673	-0.532964	4.73823	3.50686	9.00664	3124.92	1.26273	3178.16	1.20488	16	10	55	458	21.9684	15.4199	111021	1.42561	479.442	510.11	4.00795	8.24778	4.90636	14.3427	11.5917	12.9962	4.41325	1	3	3.87818	0.0570379
748	13.957	38223.1	5.50608	-0.553968	5.24694	3.61638	8.79803	3114.55	1.286	3247.76	1.20697	18	11	56	512	20.8991	14.9487	114828	1.40131	487.852	498.094	4.12278	8.9188	5.0569	14.4135	11.8995	13	4.41882	1	3	3.87818	0.0570379
749	11.7881	36483.1	5.35391	-0.564583	4.72135	3.53118	8.94495	3140.89	1.26603	3177.11	1.20707	18	11	55	524	20.3901	14.4662	114528	1.41	483.48	507.731	4.01987	8.43141	5.74115	14.0272	10.6683	13.0597	4.43077	1	3	3.87818	0.0570379
750	11.3537	35043.3	4.87528	-0.494663	3.36742	3.31369	8.4413	2672.52	1.24023	2838.6	1.2024	17	10	56	412	23.0513	16.3824	119637	1.41	416	486.476	4.02629	8.82549	5.61266	11.7654	9.83966	11.1672	4.42036	1	3	3.87818	0.0570379
751	13.5719	37382.9	5.05982	-0.486217	3.47343	3.63841	8.18865	2759.07	1.25381	2845.57	1.20504	16	10	55	374	22.5807	16.0667	121872	1.40607	416	469.899	4.18853	6.52936	5.78796	12.3121	11.4817	12.1255	4.41709	1	3	3.87818	0.0570379
752	14.4365	41032.1	5.07568	-0.537978	3.30874	3.55495	8.02523	2838.55	1.27308	2924.59	1.21081	16	10	55	425	21.8077	15.5068	123000	1.40885	416	464.709	4.11027	5.8361	5.66242	11.6454	11.1327	11.5621	4.41526	1	3	3.87818	0.0570379
753	13.8849	41906.6	5.07513	-0.499749	3.35779	3.71491	7.79441	2757.86	1.27423	2896.94	1.20342	20	12	54	449	19.3137	13.8004	121839	1.4	415.769	437.802	4.16829	8.14164	5.90308	13.5805	12.7893	13.4422	4.41602	1	3	3.87818	0.0570379
754	12.519	40238.6	5.06739	-0.561631	4.88609	3.5251	8.91917	3201.5	1.2594	3213.61	1.20108	19	12	54	502	19.8354	14.0077	115731	1.41868	482.468	506.994	4.00886	9.68575	6.3633	14.7441	13.9962	14.6173	4.40715	1	3	3.87818	0.0570379
756	8.4498	32467.8	4.73939	-0.545531	4.05645	3.62627	8.72604	2811.67	1.13749	3010.31	1.21829	16	11	53	383	23.1021	16.4025	114053	1.41	459.742	510.657	3.99938	6.65936	5.27827	12.5494	12.0798	12.3448	4.4127	1	3	3.87818	0.0570379
757	9.0052	32486.2	4.69795	-0.503226	3.92903	3.39346	8.45932	2865.73	1.17915	2894.59	1.19478	16	10	42	377	23.2821	16.6327	109594	1.40002	449.985	501.056	4.05257	8.28099	5.47459	13.6538	13.2613	13.3402	4.40305	1	3	3.87818	0.0570379
758	10.1325	35382.2	4.71902	-0.566571	4.03689	3.33492	8.64181	2915.9	1.21948	3088.32	1.19376	14	9	55	378	22.6608	16.1228	109291	1.40846	453.859	506.869	4.03274	7.03192	5.81615	12.618	11.4797	12.3946	4.41387	1	3	3.87818	0.0570379
759	10.4849	36174.7	5.01623	-0.556021	4.4466	3.32678	8.60648	2958.12	1.25166	3059.32	1.19853	20	12	56	442	20.776	15.3348	116257	1.3649	472.734	505.428	4.04617	6.88246	5.1589	11.0113	10.6395	11.522	4.40731	1	3	3.87818	0.0570379
760	10.5732	35982.6	5.06436	-0.553564	4.55767	3.40053	8.60907	2941.33	1.24477	3063.85	1.18571	19	12	57	595	17.7568	14.7422	115692	1.2	475.014	503.263	4.06167	8.21922	5.84836	13.5007	13.1055	12.7478	4.4078	1	3	3.87818	0.0570379
761	11.8163	40677	5.15487	-0.543805	4.94823	3.37026	8.68796	3128.81	1.24151	3135.92	1.18325	19	12	55	556	17.7741	14.7675	119331	1.20193	485.571	507.381	4.05656	8.06601	5.22074	13.8774	13.2772	13.0751	4.40986	1	3	3.87818	0.0570379
762	11.5679	41590.9	5.11914	-0.553548	4.93183	3.28617	8.60124	3018.58	1.23339	3124.89	1.18102	19	12	54	561	17.7119	14.642	121480	1.21002	489	507.473	4.02616	7.97172	4.90927	12.06	11.455	11.8135	4.41101	1	3	3.87818	0.0570379
763	11.4124	42198.2	5.10045	-0.584081	5.05673	3.33826	8.51904	3153.59	1.22926	3127.45	1.16859	22	14	55	547	17.6146	14.5835	122341	1.21	497.076	505.95	4.08446	7.98487	5.02485	12.6899	11.9989	12.291	4.41027	1	3	3.87818	0.0570379
764	11.3079	42176.4	4.9392	-0.523116	3.78012	3.61698	8.16294	2662.2	1.17266	2684.82	1.19924	23	16	59	428	20.2021	16.8075	122622	1.20005	437.789	479.472	4.09403	6.92871	5.55128	11.4694	10.2414	10.5541	4.40249	1	3	3.87818	0.0570379
765	11.1772	40130.6	4.88616	-0.491645	3.80601	3.5357	8.06043	2731.09	1.1946	2866.97	1.17387	22	13	50	426	20.8458	17.3215	118464	1.20916	441	479.708	4.0954	7.07266	5.75319	11.9934	11.3183	11.6869	4.41307	1	3	3.87818	0.0570379
766	11.6212	41226.2	4.82188	-0.421429	3.43562	3.53256	8.13655	2624.21	1.19051	2640.3	1.17688	18	11	55	400	20.4788	16.9964	116686	1.20481	419	479.721	4.08081	7.95483	4.9045	11.8126	11.2173	11.3438	4.41159	1	3	3.87818	0.0570379
767	10.6387	37185.5	4.75677	-0.456947	3.43848	3.47143	7.93425	2638.19	1.20131	2753.85	1.17465	21	14	58	450	19.4436	16.0646	113409	1.20736	419	473.499	4.07307	7.7968	5.16199	11.7503	10.72	11.7155	4.41428	1	3	3.87818	0.0570379
768	10.7842	39059.3	4.95652	-0.543478	4.00196	3.62957	8.20018	2857.06	1.20689	2867.37	1.16383	25	17	56	546	17.8468	14.7719	104864	1.20602	452.566	479.45	4.16928	5.11255	5.73577	12.2796	11.8961	12.0187	4.40595	1	3	3.87818	0.0570379
769	11.5763	40473.1	4.94123	-0.545558	3.6959	3.51241	7.98684	2718.9	1.22578	2709.23	1.18233	19	12	54	482	18.438	15.2113	116945	1.21	433.989	472.496	4.11338	4.32563	5.86197	13.1927	12.4769	12.6824	4.40885	1	3	3.87818	0.0570379
770	12.0596	39974.5	5.07593	-0.585748	4.60906	3.44066	8.57861	2957.81	1.23085	3001.97	1.18687	25	24	56	506	19.1487	15.9125	116022	1.20033	467.933	500.819	4.03046	4.78797	5.69154	13.5653	12.6329	13.2991	4.40622	1	3	3.87818	0.0570379
771	11.5133	40144.2	5.01108	-0.542453	4.42925	3.7251	8.33619	2876.48	1.21765	2973.57	1.17748	20	13	50	426	19.0922	15.8486	119971	1.20268	468	465.465	4.07456	6.5059	4.95224	13.168	11.5332	11.7774	4.41227	1	3	3.87818	0.0570379
772	12.5616	42169	4.90662	-0.512468	3.80509	3.73971	8.17983	2807.03	1.23071	2863.13	1.19307	18	11	47	415	19.9985	16.6968	125151	1.2	436	470.248	4.115	4.74927	4.90262	11.397	10.8041	9.90775	4.39904	1	3	3.87818	0.0570379
773	7.80313	30809	5.32558	-0.535581	5.16104	3.79117	8.5453	2924.15	1.17113	3022.64	1.14687	19	13	48	332	19.0372	15.7597	112941	1.20585	497.23	493.931	3.98957	7.14429	5.13124	12.4354	10.858	11.888	4.40387	1	3	3.75561	0.347221
774	8.60969	27670.1	5.17362	-0.484652	4.53885	3.71581	8.2749	2868.4	1.19749	2866.89	1.17485	17	11	52	345	19.6741	16.253	106573	1.20468	472.271	481.049	4.0368	6.39206	4.48474	11.3303	11.04	10.9006	4.40636	1	3	3.75561	0.347221
775	9.27645	28413.4	5.18219	-0.544784	4.53537	3.67652	8.43375	2948.67	1.23205	3020.16	1.19008	17	11	51	326	20.3157	17.0002	107295	1.19216	468	485.975	4.12768	6.16832	4.51167	12.8621	11.5784	12.078	4.4086	1	3	3.75561	0.347221
776	13.3007	38538.7	4.99784	-0.421386	3.11322	3.68594	7.7505	2531.45	1.25057	2708.24	1.19101	18	11	50	362	19.3101	16.18	117512	1.19	395.993	436.377	4.10391	7.11324	4.47393	12.8375	11.6154	12.0919	4.41328	1	3	3.75561	0.347221
777	7.8968	26942	5.14977	-0.521596	4.65915	3.72345	8.77442	2989.52	1.19628	3019.21	1.16672	18	12	53	361	18.7213	15.5434	109813	1.2	479.685	501.172	4.07438	6.61068	5.27373	12.9592	11.9062	12.1466	4.39277	1	3	3.75561	0.347221
778	9.69321	27749.4	5.12861	-0.458505	3.94716	3.6017	8.01064	2712.06	1.23378	2827.08	1.18302	19	13	48	326	20.65	17.0306	107895	1.21	439.709	468.202	4.07704	6.78454	4.87269	12.0078	11.1552	12.4016	4.40854	1	3	3.75561	0.347221
779	10.0771	28275.9	5.14299	-0.516152	4.06817	3.56928	8.30959	2819.5	1.24736	2753.98	1.20705	18	11	52	375	19.1892	15.8611	112036	1.21	445	479.869	4.10201	6.60644	4.46558	10.9699	9.72284	11.8847	4.40778	1	3	3.75561	0.347221
780	10.3739	31103.3	5.36097	-0.489796	4.13367	3.86723	8.29937	2712.63	1.25304	2704.8	1.18889	18	11	52	360	20.4624	17.0786	114784	1.20023	445	466.662	4.17602	6.41036	4.29158	11.7285	10.3582	11.2779	4.41161	1	3	3.75561	0.347221
781	10.7497	30447.7	5.24849	-0.515069	4.10548	3.786	8.6772	2819.89	1.26087	2904.63	1.21088	16	10	51	314	21.3099	17.686	108611	1.20071	445	481.005	4.13942	7.25931	4.44632	11.799	10.5157	11.4999	4.40149	1	3	3.75561	0.347221
782	9.70332	29182.4	5.17114	-0.542953	4.58837	3.75517	8.93413	2974.78	1.24495	2993.89	1.19559	20	13	51	404	18.7845	15.6528	104212	1.21	464.839	497.264	4.06614	8.17242	4.6079	12.6958	11.3223	12.3778	4.40276	1	3	3.75561	0.347221
783	8.94371	27749.7	5.1639	-0.530879	4.87815	3.75753	8.75675	3044.84	1.23234	3057.95	1.17997	17	11	50	370	19.0227	15.6626	102410	1.20656	478.99	491.793	4.09213	8.28726	4.44078	12.2955	10.8588	11.9352	4.40985	1	3	3.75561	0.347221
784	7.61499	25126.1	4.94136	-0.572749	4.63698	3.41102	8.62525	3050.12	1.20387	3083.03	1.17437	18	13	47	367	19.1912	15.7421	98014.1	1.22	483.832	506.822	3.97225	9.4138	4.16001	12.8094	11.1828	12.7432	4.40976	1	3	3.75561	0.347221
785	8.23929	26353.8	5.04778	-0.507389	4.24631	3.53801	8.26321	2790.07	1.17436	2798.05	1.15854	26	19	52	365	19.8553	16.5132	107685	1.21935	460.064	478.374	4.10978	8.30859	3.95278	11.3609	10.2643	11.2652	4.41036	1	3	3.75561	0.347221
790	8.55491	30889.6	5.17831	-0.358584	3.37779	3.62159	6.96638	2455.95	1.17763	2443.06	1.14056	35	28	49	370	12.4689	12.4377	117911	1.00531	407.892	415.392	4.37368	9.48894	4.40514	12.6335	10.3928	11.1021	4.66821	1	3	3.75561	0.347221
791	8.70378	32981.5	5.32424	-0.481025	5.12774	4.02032	8.40068	2963.1	1.21021	2898.1	1.12807	34	25	52	469	11.4824	11.4774	115964	1.00235	485.955	475.25	4.2654	8.32917	4.47395	12.945	10.7494	12.8629	4.69775	1	3	3.75561	0.347221
792	9.43208	34782.8	5.46521	-0.481591	5.16062	4.03024	8.46602	2951.62	1.21596	2899.52	1.13418	28	18	50	405	12.5909	11.8426	117132	1.07798	484.838	474.499	4.38893	8.40222	4.27197	12.3529	11.6284	12.1379	4.70223	1	3	3.75561	0.347221
793	9.54285	35200	5.49868	-0.471698	5.18289	3.67185	8.49222	2943.34	1.21957	2797.49	1.14906	24	15	49	379	15.0547	13.5583	115737	1.11002	483.793	490.089	4.32657	8.22193	4.31665	12.5142	11.3618	12.2983	4.6903	1	3	3.75561	0.347221
794	10.0692	37722.3	5.36563	-0.471382	4.19417	3.8711	7.86961	2629.22	1.2256	2700.78	1.1376	27	17	50	434	13.7113	13.1081	123149	1.05	444.514	454.41	4.3709	7.51534	4.25078	12.562	11.6032	11.7968	4.69306	1	3	3.75561	0.347221
795	9.83532	35840.9	5.2998	-0.448163	3.81061	4.02037	8.1266	2580.86	1.22785	2698.65	1.15697	20	13	50	336	16.4544	15.2493	118374	1.08256	425.861	458.283	4.37804	7.52934	4.30535	12.9038	12.0823	12.2294	4.67886	1	3	3.75561	0.347221
796	10.7657	37548.1	5.469	-0.4754	4.2708	4	8.64003	2673.3	1.22535	2770.88	1.17095	21	14	49	358	16.4442	14.6778	124352	1.12	447.738	476.84	4.40998	5.9953	4.21885	10.8674	10.2384	10.9966	4.69153	1	3	3.75561	0.347221
797	8.24939	33655.7	5.37168	-0.48601	4.71524	4.07721	8.43519	2843.65	1.21332	2686.95	1.15007	24	16	50	405	14.2665	12.6057	115210	1.13	462.675	469.919	4.34492	8.46264	4.51775	13.147	11.9804	12.5835	4.68027	1	3	3.75561	0.347221
798	8.22171	33078.9	5.39089	-0.516838	4.92715	3.98414	8.7728	2882.87	1.22909	2949.61	1.1483	24	16	51	408	13.83	12.4492	115451	1.11	483.497	486.067	4.24685	6.58434	4.34601	11.0748	10.2332	10.3657	4.69004	1	3	3.75561	0.347221
799	8.32265	32839.9	5.41945	-0.510806	4.85344	3.84968	8.74434	2847.28	1.22022	2972.38	1.15064	24	15	51	360	16.3804	13.9186	113538	1.1894	486.79	493.061	4.25972	8.41125	4.81808	12.1777	11.1236	10.5813	4.66107	1	3	3.75561	0.347221
800	8.51348	34509.9	5.41678	-0.527687	5.4098	3.94483	8.53691	2902.57	1.23011	2971.41	1.14157	28	18	59	454	13.2144	10.9297	115377	1.21051	496.333	484.283	4.25928	6.65311	4.27515	11.1078	9.94367	10.7173	4.68894	1	3	3.75561	0.347221
801	9.84015	36541.8	5.54184	-0.423418	4.32841	4.1337	8.28101	2680.17	1.23766	2632.57	1.15201	22	14	56	345	15.3593	12.8392	116658	1.2	450.854	446.317	4.3649	5.45333	4.86335	11.9661	11.5549	11.8377	4.68797	1	3	3.75561	0.347221
802	11.662	37532.2	5.55287	-0.500998	4.52263	3.96255	8.94424	2763.6	1.24568	2818	1.19479	17	10	52	237	20.2856	16.8615	119641	1.2	454.7	486.706	4.41123	4.40888	4.02701	10.4824	9.54387	10.8812	4.68854	1	3	3.75561	0.347221
803	8.61651	32303.8	5.45373	-0.486722	4.44253	4.02427	8.70752	2725.93	1.2312	2839.3	1.16005	24	16	51	305	16.6774	13.0109	109176	1.29489	468.962	482.376	4.27839	6.95434	4.58119	11.3124	10.1218	12.0276	4.70077	1	3	3.75561	0.347221
804	8.28819	32170.5	5.28907	-0.552429	5.11736	3.80668	8.86728	2879.41	1.22858	2956.4	1.15859	22	13	49	328	16.0699	12.4421	114452	1.3	484.119	497.666	4.36165	7.16597	4.80368	12.2395	11.2175	12.7203	4.69923	1	3	3.75561	0.347221
805	9.54006	33890.4	5.31709	-0.549515	5.1296	3.71856	8.71072	2873.65	1.23773	2977.72	1.16249	23	14	51	360	15.8949	12.2722	115513	1.30245	482.685	493.683	4.25873	7.84118	4.24874	11.7088	10.6676	12.4108	4.69844	1	3	3.75561	0.347221
806	9.42789	32232.5	5.35391	-0.511839	4.95497	3.75453	8.83275	2976.66	1.23044	2976.81	1.16655	20	12	49	322	17.0359	13.1326	114351	1.29944	483.857	497.04	4.32242	7.75899	4.24365	12.2358	10.9097	12.7847	4.70171	1	3	3.75561	0.347221
807	11.3632	34015.8	5.49462	-0.533007	4.29364	3.81431	8.42056	2780.13	1.26463	2908.37	1.18143	18	12	53	324	19.9734	15.2173	118256	1.31853	459.331	473.839	4.34793	6.48035	4.8949	11.2388	10.4612	11.437	4.70373	1	3	3.75561	0.347221
808	12.485	36175.8	5.54119	-0.535772	4.61049	3.77098	8.69174	2807.16	1.26093	2866.07	1.18189	17	10	49	305	21.3281	16.4022	119422	1.3	458.942	487.172	4.41106	6.90717	5.32882	11.3652	10.5069	12.0715	4.70009	1	3	3.75561	0.347221
809	11.8302	35490.7	5.46867	-0.5	4.1828	3.78323	8.76129	2671.2	1.24911	2760.01	1.18792	16	10	51	341	21.2363	16.2335	119052	1.31	441.351	486.417	4.36943	5.98446	5.36567	10.953	10.1583	11.5728	4.69689	1	3	3.75561	0.347221
810	11.5794	35869.6	5.33143	-0.432762	3.88468	4.0257	8.5788	2564.99	1.22693	2728.37	1.17169	21	13	50	288	21.2375	16.076	121255	1.32555	430.974	473.111	4.42178	7.03862	5.45197	11.2162	9.96594	11.8491	4.69577	1	3	3.75561	0.347221
811	8.52748	31932.9	5.33477	-0.53642	4.76358	3.88862	8.81919	2817.55	1.21007	2925.76	1.1446	22	14	51	378	16.6146	12.7752	111631	1.3	484.063	496.937	4.23005	7.38922	5.35616	11.6195	10.3537	12.2951	4.69636	1	3	3.75561	0.347221
812	6.83876	29821.5	5.23696	-0.542916	5.0809	4.02047	9.08376	2929.11	1.18486	3029.65	1.14692	22	15	50	372	16.8144	12.8926	107737	1.3	498.409	504.281	4.28949	9.3114	5.40247	12.9368	11.4518	13.4372	4.69276	1	3	3.75561	0.347221
813	7.00501	29622.3	5.05	-0.493373	4.5243	4.07467	8.73626	2918.05	1.20139	2908.3	1.14145	20	13	50	373	16.3212	12.6983	108204	1.29346	471.72	485.836	4.28418	8.7626	5.39206	14.4026	12.653	14.8432	4.69109	1	3	3.75561	0.347221
814	9.01635	34072.4	5.2123	-0.504813	4.21015	4.09536	8.55673	2643.6	1.23153	2772.34	1.16013	22	13	51	278	21.8051	16.5289	114535	1.32004	439.856	471.108	4.37901	8.89674	5.01911	14.094	12.075	14.1258	4.69331	1	3	3.75561	0.347221
815	10.0716	35437.5	5.22469	-0.505237	4.15967	3.96872	8.35686	2719.77	1.23328	2635.02	1.17364	18	11	50	321	20.0305	15.1761	117339	1.32	433.633	482.84	4.37028	5.90009	4.83201	12.3427	10.8543	11.2675	4.67167	1	3	3.75561	0.347221
816	10.7215	37066.9	5.47283	-0.479891	4.16576	4.013	8.77646	2632.32	1.24146	2762.71	1.17665	17	10	54	361	22.4428	17.0704	115698	1.31191	442	480.897	4.38045	5.82819	4.93407	12.3855	10.9692	12.0798	4.69608	1	3	3.75561	0.347221
817	11.4974	37490.7	5.56927	-0.48776	4.52552	3.97618	8.71738	2784.41	1.24731	2848.41	1.16879	17	11	54	369	21.5644	16.4667	115218	1.31	458.929	478.268	4.40501	7.07465	4.3947	13.409	11.7881	12.822	4.68207	1	3	3.75561	0.347221
818	9.81685	36533.3	5.45453	-0.505298	4.94768	3.91636	8.95836	2943.81	1.2669	2923.57	1.17079	21	13	49	439	17.6744	13.504	113758	1.30949	479.624	490.267	4.31883	7.67309	4.51528	13.5541	12.3714	12.6961	4.68396	1	3	3.75561	0.347221
819	10.931	38227.8	5.45764	-0.54083	5.05873	3.95486	9.12572	2890.53	1.27287	2996.8	1.16627	20	12	51	479	17.9775	13.88	116509	1.29648	485.092	494.953	4.35195	7.42006	5.10935	13.2764	12.073	12.9232	4.69413	1	3	3.75561	0.347221
820	11.3509	38979.4	5.52057	-0.51116	5.48643	3.62022	8.9565	3050.57	1.26079	3033.06	1.15741	23	14	51	401	17.2386	13.2955	115811	1.29	498.935	502.099	4.30551	6.37607	4.66502	12.1546	11.3385	9.43486	4.69721	1	3	3.75561	0.347221
821	11.1779	39753.4	5.38696	-0.517391	5.36178	3.49019	8.88396	3082.68	1.27395	3072.19	1.16486	21	12	48	476	18.1651	13.8742	115280	1.31	492.684	506.351	4.35628	7.02863	5.413	12.6986	11.8719	12.8709	4.70902	1	3	3.75561	0.347221
822	7.30602	30606	5.2	-0.436674	4.46082	3.82594	6.5938	2711.05	1.16931	2836.12	1.11857	23	15	51	255	20.5336	15.8545	121476	1.29806	462.005	397.221	4.09558	7.7191	5.08199	11.6512	11.1161	12.1041	4.41012	1	3	3.75561	0.347221
823	12.7115	38817.3	5.52298	-0.466841	4.66736	3.74375	6.56832	2711.74	1.20983	2828.27	1.13012	19	12	51	320	21.1347	15.9601	117604	1.32108	465	398.352	4.16748	7.06589	6.14831	12.778	11.6525	12.9023	4.41966	1	3	3.75561	0.347221
824	12.4895	40752.5	5.52474	-0.478827	4.64745	3.652	7.18147	2804.55	1.23822	2841.62	1.15977	18	11	49	372	20.0773	15.3804	120303	1.30682	471.392	439.813	4.17261	7.75718	6.07532	13.0734	12.1112	13.2907	4.41347	1	3	3.75561	0.347221
825	12.104	41487.7	5.14055	-0.509162	5.34912	3.72154	6.95402	2977.65	1.21536	2986.52	1.10786	33	22	50	524	14.8375	10.9365	119476	1.36744	499.99	432.223	4.15793	8.41373	6.13762	13.7136	12.2491	13.91	4.41456	1	3	3.75561	0.347221
826	6.1507	32622.9	5.66144	-0.460593	5.51695	4.09353	7.72657	2885.37	1.22314	2985.12	1.18145	24	17	50	329	16.9215	13.01	114991	1.30386	494.956	446.519	4.67079	10.3836	6.0804	13.3494	11.8201	14.1401	4.41275	1	3	3.75561	0.347221
827	7.27543	31545.2	5.52732	-0.494537	5.49002	4.03523	7.73992	2955.18	1.24383	3043.22	1.19697	17	11	48	264	18.835	14.3249	109147	1.31961	494.071	448.497	4.63492	10.5894	5.6671	12.9473	11.3834	13.8174	4.42192	1	3	3.75561	0.347221
828	7.68047	33374.2	5.50679	-0.490217	4.53668	4.00426	7.32825	2808.1	1.27241	2954.26	1.22973	16	10	50	312	21.8256	15.4668	113232	1.41018	456.364	430.783	4.62226	8.19463	6.00084	12.3213	11.9393	13.8542	4.40981	1	3	3.75561	0.347221
829	7.5071	32437.9	5.54147	-0.539412	4.62706	4.04563	7.09369	2858.84	1.27762	2968.84	1.22905	20	13	50	348	22.7461	16.1789	114159	1.41201	472.376	420.408	4.62778	6.67805	5.97782	12.162	11.0884	12.3872	4.40408	1	3	3.75561	0.347221
830	8.17424	33978.2	5.69929	-0.551437	4.9454	4.02701	7.17962	2874.18	1.26946	3025.56	1.2271	15	10	51	247	23.269	16.5303	114439	1.40668	483.476	428.002	4.65518	6.66934	6.18857	11.9582	11.0585	8.58386	4.40257	1	3	3.75561	0.347221
831	8.37874	33713.4	5.63233	-0.561094	4.61429	4.04085	7.09696	2848.13	1.26442	3003.41	1.21821	16	10	47	342	23.6348	16.7361	114397	1.4101	462.134	439.088	4.64489	7.01914	6.1895	12.8396	11.8597	12.5971	4.39283	1	3	3.75561	0.347221
835	7.0923	31192.5	5.34925	-0.551244	5.03682	3.98586	7.51578	2927.63	1.26922	3089.14	1.20424	17	11	50	348	19.9998	14.2082	112608	1.41	489.525	442.75	4.59667	6.86199	4.94794	11.385	10.6652	11.6531	4.39663	1	3	3.75561	0.347221
836	7.20642	30577.8	5.32625	-0.529833	5.56014	4.01378	7.64252	3102.77	1.22144	3089.94	1.18533	21	19	48	324	18.985	13.5494	112812	1.40602	512.577	450.882	4.62273	9.12687	4.9677	12.7292	11.4688	13.3576	4.41105	1	3	3.75561	0.347221
837	6.99137	30736.1	5.36322	-0.542952	5.36564	4.09545	7.52673	3033.26	1.21715	3038.9	1.18733	18	12	51	393	18.2605	13.1151	108721	1.39002	500.731	442.415	4.6592	10.494	5.24545	14.566	13.0667	14.3012	4.41968	1	3	3.75561	0.347221
838	7.55408	30479.2	5.35925	-0.5415	5.71825	4.00948	7.72454	3140.11	1.2196	3138.18	1.1956	16	11	50	380	20.2676	14.5027	112471	1.4	517	455.534	4.61364	7.21453	5.29889	12.5266	10.8168	12.5325	4.42223	1	3	3.75561	0.347221
844	6.99916	30352.7	5.67327	-0.54802	5.95495	3.98673	7.63286	3159.21	1.23078	3146.05	1.19441	17	11	53	359	19.9682	14.2943	108815	1.4	522.439	451.941	4.64551	8.42273	6.13302	13.5114	11.7818	13.2219	4.41586	1	3	3.75561	0.347221
845	6.9049	30468.3	5.60396	-0.514851	5.82847	3.94898	7.69776	3127.14	1.23392	3115.61	1.19764	19	14	54	362	20.1592	14.402	107071	1.40088	518.143	440.468	4.65874	9.90656	5.9398	13.6615	11.7484	14.1445	4.44307	1	3	3.75561	0.347221
846	7.02436	29889.4	5.41609	-0.537793	4.79648	4.00116	6.97888	2809.97	1.22275	2957.85	1.23326	20	21	65	375	19.5849	14.0186	114040	1.40857	485.56	423.391	4.59062	8.53244	5.88799	13.0199	11.4811	13.0567	4.41089	1	3	3.75561	0.347221
847	5.68806	25826	5.01415	-0.518095	5.40714	3.67308	7.17701	3187.4	1.13929	3170.78	1.11856	18	12	54	366	19.4513	13.9138	112780	1.4	518.029	457.053	3.95651	7.14406	6.1239	11.8109	10.5571	12.0997	4.40935	1	3	3.75561	0.347221
848	6.58785	28153.1	5.00345	-0.506207	5.56648	3.77008	6.97898	3076.54	1.1792	3053.4	1.12855	19	14	54	371	18.2148	12.9964	107747	1.4	508.585	439.367	4.0438	7.70142	5.84294	11.8019	9.96731	12.2003	4.4086	1	3	3.75561	0.347221
849	6.4945	28627.9	4.8844	-0.471581	3.67094	3.84462	6.80988	2554.43	1.17008	2802.75	1.13565	23	19	54	352	17.303	12.4423	111661	1.40069	425.917	422.78	4.11039	8.24652	5.92347	11.899	10.2122	11.7955	4.41654	1	3	3.75561	0.347221
850	6.5972	28952	5.0735	-0.531336	5.74326	3.70721	7.19696	3143.56	1.17153	3115.17	1.12358	20	14	53	401	18.4526	13.1875	107605	1.4	517.852	452.347	4.06173	6.49271	5.88101	11.581	10.938	11.0613	4.41526	1	3	3.75561	0.347221
851	5.55746	27026.3	5.03689	-0.523241	5.5942	3.81968	7.08576	3099.84	1.16021	3081.95	1.1302	20	15	55	372	17.4279	12.4366	107942	1.4	512.905	445.311	4.09701	7.14539	5.80591	11.2912	10.1548	10.922	4.41519	1	3	3.75561	0.347221
852	6.17425	28363.8	5.06606	-0.516173	5.63645	3.76379	6.8242	3204.4	1.16991	3195.16	1.10558	23	16	54	326	18.2077	13.0274	105807	1.40413	532.285	438.441	4.0538	6.02786	5.56272	10.7003	8.28206	10.717	4.4171	1	3	3.75561	0.347221
853	7.47731	30050.4	5.26934	-0.543707	5.99954	3.70849	6.61226	3215.49	1.19689	3169.69	1.10494	20	13	53	328	17.8875	12.7528	105478	1.41183	536.179	428.792	4.07228	6.02156	5.55917	10.428	9.25301	10.5953	4.41674	1	3	3.75561	0.347221
854	6.28559	27768.1	5.01935	-0.517312	5.88691	3.68322	6.95336	3169.15	1.18331	3109.04	1.10504	27	22	60	354	16.6586	11.8196	99493	1.41612	521.584	443.027	3.98822	4.5764	5.98036	11.576	10.308	11.7844	4.41633	1	3	3.75561	0.347221
855	6.28401	28314.5	4.91304	-0.518043	5.36935	3.72706	7.15573	3014.1	1.19811	3070.99	1.11418	25	18	52	340	16.5885	11.9643	101174	1.38993	503.026	446.787	4.02454	8.67189	5.97375	11.8605	10.5012	12.3708	4.41631	1	3	3.75561	0.347221
856	8.24328	32558.2	5.19874	-0.526105	5.40547	3.75174	6.48212	2959.53	1.21793	3063.53	1.1124	19	13	55	368	17.4411	12.3615	107488	1.41483	496.68	414.894	4.07803	6.97658	5.52215	10.8205	8.28368	10.7239	4.40948	1	3	3.75561	0.347221
857	10.3983	35767.8	5.54439	-0.54148	6.05693	3.60129	6.66728	2984.64	1.22827	3065.99	1.12739	19	12	54	361	18.1845	12.9793	109391	1.4	517.115	429.079	4.10456	7.72468	5.72646	12.674	10.3204	11.7493	4.40589	1	3	3.75561	0.347221
858	13.3999	41589.4	5.49282	-0.561343	5.66944	3.53092	6.65019	3039.14	1.2642	3120.1	1.13294	20	13	52	365	17.32	12.317	115615	1.41	504.188	417.431	4.10826	8.0386	5.87341	14.0827	11.7747	12.8873	4.41922	1	3	3.75561	0.347221
859	6.28691	29251.6	5.0417	-0.516023	5.52008	3.70605	6.3242	3122.58	1.16436	3046.26	1.10241	31	23	53	426	15.6984	11.2376	108231	1.40678	517.901	415.148	4.00372	9.44329	5.97582	14.2623	12.2501	13.3948	4.4185	1	3	3.75561	0.347221
860	8.46561	31074.3	4.92836	-0.511975	5.44118	3.74974	6.64541	3003.29	1.19314	3073.83	1.08934	20	13	58	391	17.6527	12.6054	103935	1.39998	508.092	425.107	4.04932	9.18657	6.04786	14.7201	12.9254	13.8973	4.41387	1	3	3.75561	0.347221
861	11.2197	33975.3	4.95044	-0.508444	5.46578	3.66832	6.45952	3114.36	1.19902	3091.52	1.08988	19	13	53	360	17.7275	12.6114	108910	1.41	512.7	418.991	4.13129	9.7027	5.78046	12.7422	10.7482	13.9045	4.41009	1	3	3.75561	0.347221
862	12.0849	37835.2	4.99919	-0.500407	5.83658	3.67869	6.19111	3023.86	1.19586	3092.04	1.08796	22	15	54	415	16.396	11.7738	113651	1.39	516.94	399.692	4.16291	7.98554	5.64644	12.5147	10.8269	12.4645	4.42165	1	3	3.75561	0.347221
863	9.61448	33834.7	5.27143	-0.502143	5.2181	3.66326	6.49489	2882.26	1.21099	2964.93	1.12206	18	12	54	361	18.8603	13.4454	107836	1.40528	492.869	402.686	4.10659	8.07819	5.79927	12.7742	11.6401	12.483	4.41302	1	3	3.75561	0.347221
864	8.41145	31069.4	5.20506	-0.49954	4.78161	3.69167	6.78011	2768.99	1.18183	2908.34	1.14414	22	19	59	370	18.7367	13.3176	111312	1.4078	476.694	411.637	4.10965	9.01335	5.67449	12.3737	10.9023	12.3492	4.42217	1	3	3.75561	0.347221
865	7.03124	27459.4	4.95938	-0.505913	5.60746	3.62987	7.10699	3169.38	1.15953	3150.45	1.1168	16	13	53	426	20.0426	14.2835	105231	1.40371	523.057	453.252	3.95074	7.11152	6.00966	11.9567	10.9958	11.2685	4.41218	1	3	3.75561	0.347221
866	7.50982	29072.9	5.04469	-0.48465	5.76614	3.62737	7.02682	3192.32	1.17603	3145.29	1.10904	22	18	53	398	18.3391	13.0812	103688	1.40397	525.156	448.594	3.96912	7.86539	6.00676	13.307	11.9445	12.2573	4.41516	1	3	3.75561	0.347221
867	7.31093	29808	5.07336	-0.478384	5.90175	3.74793	6.57532	3206.45	1.17062	3166.18	1.09233	24	16	54	416	17.9632	12.751	103283	1.41	526.777	429.18	4.08464	8.55268	5.24008	13.0956	10.7546	11.4918	4.42312	1	3	3.75561	0.347221
868	7.82978	31951.3	5.15459	-0.519463	6.20336	3.71642	6.87196	3249.04	1.20202	3223.96	1.09725	19	13	55	371	18.2613	12.9675	104467	1.41	541.937	440.356	4.08398	6.80389	5.81614	11.6676	10.8745	11.9369	4.42266	1	3	3.75561	0.347221
869	7.75119	31962.8	5.16534	-0.538631	6.48036	3.69345	6.83036	3236.03	1.18609	3174.68	1.09803	20	14	53	385	17.3496	12.4607	105644	1.38406	543.175	441.055	4.08017	6.66595	5.78795	11.9529	11.3846	12.2474	4.41163	1	3	3.75561	0.347221
870	9.35909	34246.5	5.34903	-0.547957	6.46473	3.71596	6.41968	3259.95	1.21176	3215.61	1.09125	19	13	55	330	17.5158	12.4963	104343	1.4	547.706	419.863	4.12351	7.52801	5.75021	11.9494	10.987	12.5323	4.40988	1	3	3.75561	0.347221
871	11.2953	37087.9	5.39158	-0.522894	6.42181	3.57349	6.61601	3265.82	1.24169	3215.25	1.10437	19	13	55	372	17.597	12.706	107962	1.40464	543.05	430.32	4.13477	8.44542	6.16141	12.9266	11.6959	13.6483	4.41055	1	3	3.75561	0.347221
872	10.8958	35783.2	5.03025	-0.493002	5.88352	3.43501	6.58343	3186	1.22455	3143.12	1.1023	19	12	53	390	18.2317	13.0486	101372	1.4	516.799	424.555	3.97417	9.62337	6.53336	14.8433	13.776	15.1686	4.4105	1	3	3.75561	0.347221
873	10.909	35079.5	4.93533	-0.467864	5.74192	3.62763	6.45954	3153.02	1.20761	3066.1	1.08407	22	15	53	453	16.1712	11.5253	106554	1.41	512.591	422.579	4.12881	9.60428	5.69372	14.8936	13.2364	15.6613	4.41488	1	3	3.75561	0.347221
874	10.5456	33976	4.89365	-0.502845	5.88009	3.63628	6.13213	3219.12	1.17757	3141.53	1.05594	21	15	52	396	17.2814	12.381	104643	1.39944	525.718	401.667	4.02554	8.21069	6.11526	12.5547	11.2499	13.2447	4.41288	1	3	3.75561	0.347221
875	9.14084	33291.7	5.33672	-0.48121	6.66809	3.69091	6.49982	3234.04	1.20279	3194.81	1.08655	19	13	54	343	17.6893	12.5711	107743	1.41	544.471	424.811	4.09916	7.20294	6.09189	10.361	9.27026	10.8644	4.41899	1	3	3.75561	0.347221
876	11.2306	35322.8	5.42495	-0.543497	6.71916	3.65905	6.49649	3246.64	1.21997	3197.77	1.08797	20	13	53	327	17.7571	12.5641	108327	1.41559	543.691	423.963	4.16229	7.74888	6.08816	12.117	10.5088	12.7981	4.40907	1	3	3.75561	0.347221
877	9.82838	34520	5.32685	-0.530568	6.59279	3.62306	6.8645	3248.5	1.21076	3199.52	1.09635	21	14	54	323	17.7431	12.5652	108071	1.41	543.53	442.474	4.13758	7.16176	5.93663	11.2959	10.0934	11.8974	4.42224	1	3	3.75561	0.347221
878	9.95311	33898.9	4.9684	-0.498918	6.06429	3.59162	6.66025	3238.06	1.20979	3191.97	1.08248	21	14	56	378	17.4512	12.4542	103165	1.40004	524.381	435.462	4.03966	7.5322	5.94911	11.2589	10.0535	11.0142	4.40999	1	3	3.75561	0.347221
879	11.4671	34491.8	4.84289	-0.533121	6.00679	3.48459	6.2662	3269.53	1.22872	3211.33	1.08803	20	14	52	414	17.2014	12.2771	103157	1.4	529.919	403.106	4.00483	8.0565	5.98348	12.6864	11.1286	13.6222	4.41898	1	3	3.75561	0.347221
880	11.0871	34301.6	4.96777	-0.50596	6.66273	3.50182	6.71309	3303.23	1.22732	3222.26	1.08622	24	20	56	415	17.7845	12.6931	101428	1.40293	540.225	438.973	4.01823	10.5139	6.16903	14.8371	13.3282	15.4915	4.4115	1	3	3.75561	0.347221
881	13.9623	37627	5.06257	-0.468226	5.81481	3.58167	6.09453	3182.95	1.23841	3080.04	1.09186	26	19	53	433	15.9241	11.3852	111894	1.40206	512.548	392.487	4.20514	9.50102	5.40534	13.2735	12.8221	14.7144	4.41055	1	3	3.75561	0.347221
882	12.4399	36475.7	5.42019	-0.519002	6.96176	3.65118	6.63706	3269.8	1.22068	3222.82	1.08943	20	13	53	298	18.7284	13.4106	113329	1.4	550.49	430.537	4.1629	8.91683	5.94956	12.9224	12.1236	11.776	4.41048	1	3	3.75561	0.347221
883	11.549	35410	5.30747	-0.4968	6.27173	3.58505	6.97451	3214.13	1.20465	3170.18	1.09304	16	11	52	250	21.5349	15.3187	110624	1.41	541.325	447.064	4.17876	7.88102	5.82191	11.6555	11.0654	11.5257	4.42222	1	3	3.75561	0.347221
884	12.417	35942.9	5.26629	-0.457022	5.69073	3.62037	7.0375	2960.26	1.19704	3057.27	1.09385	16	11	53	265	21.8359	15.4301	112163	1.42	508.789	446.942	4.16469	7.74596	6.12319	12.0706	11.7029	11.8459	4.42069	1	3	3.75561	0.347221
885	5.79944	25549.5	4.93978	-0.477391	6.0638	3.68853	6.6767	3222.77	1.11618	3146.24	1.07375	23	35	53	330	18.8224	13.4595	117111	1.40009	542.824	441.556	4.02596	9.47012	6.76072	13.3184	12.488	13.4152	4.39533	1	3	3.75561	0.347221
886	5.82396	24585.8	4.85658	-0.458561	5.9207	3.58934	6.75799	3088.78	1.13117	3147.08	1.07324	21	38	54	316	20.2074	14.4096	98111.5	1.40326	530.941	446.068	3.97294	8.69488	6.79944	14.5255	13.152	14.8628	4.39537	1	3	3.75561	0.347221
887	6.39837	26707.6	4.997	-0.501285	6.46508	3.66966	6.55661	3256.3	1.16183	3167.01	1.06017	19	14	52	319	17.1496	12.3169	101689	1.39	546.305	430.376	4.06786	8.09085	6.40043	11.098	10.7026	12.2933	4.3911	1	3	3.75561	0.347221
888	8.87337	29901.8	5.10394	-0.528079	6.49655	3.68438	6.60162	3284.69	1.19054	3230.2	1.06334	17	12	56	279	20.017	14.2223	101868	1.41	548	431.039	4.05819	7.65403	6.1399	9.50796	9.25695	11.5391	4.3987	1	3	3.75561	0.347221
889	9.7323	32446.3	5.10835	-0.509422	6.53316	3.59048	6.44475	3226.54	1.19774	3167.9	1.07992	20	15	53	331	17.3145	12.1822	103763	1.42908	541.478	446.504	4.05857	7.95716	6.10175	11.2511	10.9661	12.5956	4.40114	1	3	3.75561	0.347221
890	9.05312	30691.2	4.87807	-0.56168	5.90369	3.43142	6.5598	3206.69	1.19199	3131.04	1.07334	20	14	54	399	17.1672	12.1681	102471	1.41	530.404	436.252	3.84053	8.48266	5.83684	11.8978	10.9572	13.3209	4.40114	1	3	3.75561	0.347221
891	8.6604	30543.2	5.06554	-0.628541	6.56899	3.51603	6.81289	3258.31	1.20108	3157.75	1.07874	25	18	52	403	17.2969	12.4585	100161	1.39253	546.226	444.951	3.94471	9.60427	6.33603	14.85	13.9449	14.9795	4.40314	1	3	3.75561	0.347221
892	10.2135	32792.9	4.92317	-0.622376	6.29069	3.45269	6.78793	3259.78	1.20421	3182.36	1.07929	22	15	54	432	16.4804	11.7201	105412	1.41	539.44	445.684	3.88971	6.99304	5.96369	13.2535	12.3171	13.4599	4.3965	1	3	3.75561	0.347221
893	11.644	35893	5.10972	-0.615983	6.56988	3.67059	6.12246	3248.64	1.22019	3173.45	1.08134	22	16	53	349	16.9948	12.0713	110714	1.40922	540.665	398.065	4.10434	7.28016	5.16294	12.4275	11.0529	12.8984	4.39689	1	3	3.75561	0.347221
894	9.59667	33624.4	5.02261	-0.592541	6.45962	3.67481	6.05897	3219.24	1.20019	3152.53	1.07334	23	14	55	324	18.8054	13.6254	109550	1.39938	541.798	408.331	4.02703	7.78727	5.55698	11.3294	10.8628	11.2416	4.40652	1	3	3.75561	0.347221
895	10.6617	33914.7	5.03153	-0.571396	6.37384	3.5885	6.69907	3195.6	1.21093	3126.52	1.08261	22	15	56	336	18.3375	13.0486	108116	1.40679	535.078	420.802	4.07824	7.9952	4.76205	12.1765	10.6755	12.4588	4.39794	1	3	3.75561	0.347221
896	9.34644	31986.2	4.96197	-0.576958	6.59391	3.56771	6.77712	3274.53	1.21688	3195.42	1.08588	21	14	54	418	17.9244	12.8118	101137	1.40161	543.028	440.133	3.98514	7.5241	5.18079	12.5359	10.5798	13.1565	4.40488	1	3	3.75561	0.347221
897	9.03245	32171.8	5.012	-0.581263	6.62465	3.51771	6.74358	3282.1	1.19264	3210.12	1.0685	23	15	54	405	17.4137	12.534	97460.7	1.39	549.215	431.461	3.94108	9.32333	5.53548	14.6197	12.9965	14.9056	4.40912	1	3	3.75561	0.347221
898	8.93958	32110	4.9536	-0.590541	6.35788	3.54545	6.68646	3276.53	1.20326	3198.86	1.07056	25	17	53	355	18.2419	12.9846	99548	1.4074	546.045	439.623	3.9628	8.87002	4.71146	13.6593	11.074	15.2833	4.40351	1	3	3.75561	0.347221
899	10.5954	33406.1	5.02875	-0.574693	5.85602	3.70892	6.77181	3045.38	1.19825	3093.56	1.07223	19	13	53	282	19.5621	13.8124	107530	1.42	528.694	434.071	4.13649	7.65906	5.1266	13.0817	12.3299	13.0796	4.40952	1	3	3.75561	0.347221
900	11.5517	36601.8	5.26324	-0.572494	6.33445	3.56462	6.88792	3193.6	1.20293	3123.08	1.07915	19	13	53	311	19.2542	13.7604	112679	1.4	541.318	443.174	4.1303	7.101	5.11694	11.5827	11.2659	12.1773	4.40002	1	3	3.75561	0.347221
901	12.3292	38383.6	5.33015	-0.558247	6.67941	3.67856	6.59575	3199.23	1.21457	3153.06	1.07804	19	13	52	317	20.1367	14.3316	112556	1.40633	542.023	427.104	4.12553	7.03763	5.25209	11.6213	11.7359	13.1471	4.40953	1	3	3.75561	0.347221
902	10.1643	34977.6	4.97044	-0.586667	6.32692	3.6533	6.47839	3204.29	1.21702	3120.07	1.07537	23	15	52	385	17.4115	12.3473	104756	1.41	533.326	406.116	4.07849	9.4883	5.75082	13.4644	13.7737	15.3537	4.39721	1	3	3.75561	0.347221
905	10.4293	34462.8	5.00832	-0.605757	6.68313	3.4826	6.8645	3284.98	1.21058	3192.48	1.07435	22	15	54	399	17.7301	12.581	105015	1.41	548.858	448.527	3.94644	9.19486	5.89786	13.7325	13.274	14.619	4.39597	1	3	3.75561	0.347221
906	11.7062	36683.3	5.36082	-0.592641	6.77749	3.55286	6.53071	3277.8	1.2177	3177.59	1.07937	21	14	52	432	16.9843	12.137	107661	1.4	551.5	415.232	4.05744	8.14905	5.74321	14.3442	13.5827	15.244	4.39461	1	3	3.75561	0.347221
907	11.2516	36896	5.31283	-0.602375	6.91037	3.6227	7.28297	3288.89	1.22821	3221.57	1.08634	20	14	55	390	18.8339	13.3853	108520	1.40937	551.174	457.973	4.10596	8.67407	5.31591	13.5687	13.2402	15.2599	4.40532	1	3	3.75561	0.347221
908	13.7313	40604.8	5.33325	-0.579404	6.91762	3.59119	6.59365	3287.56	1.2395	3206.63	1.08513	22	15	52	392	18.6693	13.1842	114068	1.41576	550.094	429.6	4.14619	8.64657	6.24199	13.2493	13.323	15.3291	4.39213	1	3	3.75561	0.347221
909	11.9578	39097	5.30022	-0.592391	6.77885	3.62455	6.78674	3213.23	1.21408	3126.65	1.07713	26	17	54	453	16.8324	11.9753	112695	1.40061	548.704	437.787	4.13787	9.28141	6.26342	12.1409	12.277	15.5755	4.39266	1	3	3.75561	0.347221
910	10.0556	36157.1	4.81455	-0.581762	6.33279	3.40118	6.75997	3292.05	1.22763	3208.89	1.0857	22	15	53	445	16.4465	11.7704	106016	1.4	539.252	445.495	3.84678	8.50645	6.44202	12.6737	12.7963	15.7947	4.40391	1	3	3.75561	0.347221
911	10.3952	36294.4	4.97131	-0.626195	6.65736	3.46575	6.75223	3288.22	1.22522	3196.89	1.08528	23	15	54	433	16.9692	12.0342	105897	1.41	543.611	440.589	3.92515	8.37991	5.45301	10.9573	10.3479	14.0399	4.40507	1	3	3.75561	0.347221
912	10.0559	34857.9	4.95821	-0.591045	6.52039	3.51564	6.99016	3278.9	1.23767	3205.78	1.09435	19	13	54	425	17.1989	12.2359	104883	1.41	537	448.436	3.9519	8.61612	6.01253	12.2044	11.4416	13.3601	4.40318	1	3	3.48578	3.99587
913	11.3747	36912.3	5.08571	-0.607959	6.77071	3.47896	6.58468	3347.71	1.25268	3236.48	1.09602	24	16	55	439	16.5542	11.7773	108218	1.4	544.234	423.931	3.94672	9.23718	5.38382	11.6722	10.2275	13.2432	4.40425	1	3	3.48578	3.99587
914	11.587	39257	5.23683	-0.615644	6.93889	3.58431	6.83905	3391.83	1.26892	3282.91	1.10843	25	16	55	482	15.4969	11.1204	113948	1.39	549	424.024	4.10069	8.51697	5.79073	11.9334	11.8037	12.6505	4.39112	1	3	3.48578	3.99587
915	13.1783	41363.2	5.44264	-0.599031	6.63051	3.49313	6.31709	3375.73	1.28027	3253.11	1.11557	28	19	56	465	15.2256	10.8703	116941	1.40228	537	403.775	4.10226	7.48181	5.71926	12.4944	11.6029	12.2203	4.40425	1	3	3.48578	3.99587
916	14.1378	41762	5.21453	-0.586966	6.79542	3.40053	6.67482	3319.03	1.26514	3230.18	1.10512	25	17	54	420	16.2681	11.6401	114839	1.40002	542.694	437.917	4.02004	8.11103	5.74831	12.5484	11.5448	12.2996	4.40397	1	3	3.48578	3.99587
917	13.912	41613.2	5.14699	-0.609577	6.85817	3.4233	6.59505	3375.66	1.26804	3262.61	1.10717	25	17	54	411	16.7259	11.904	113177	1.40628	546.185	433.901	4.0353	9.45713	6.91948	13.4049	12.7257	12.9524	4.39751	1	3	3.48578	3.99587
918	12.1004	39462.3	5.00423	-0.608654	6.97132	3.48304	6.58637	3332.66	1.23074	3207.6	1.08889	27	18	53	482	15.1918	11.393	110130	1.39762	553.563	424.379	3.98883	11.4376	7.27708	14.2753	14.1144	13.5027	4.39896	1	3	3.48578	3.99587
920	8.59864	32244.9	4.78209	-0.565079	6.01383	3.67514	6.56561	3152.59	1.15222	3067.34	1.06569	28	21	57	394	17.9585	12.9363	103972	1.38327	534.585	430.576	4.03019	5.95178	6.8333	13.2871	13.3848	12.7503	4.38711	1	3	3.48578	3.99587
921	7.96373	31660.1	4.9335	-0.576826	6.19253	3.80394	6.4335	3177.04	1.15311	3141.39	1.08261	18	14	54	340	20.1629	14.2568	103980	1.42415	536.514	438.048	4.12309	8.20122	6.32133	13.1142	11.8774	12.8554	4.38986	1	3	3.48578	3.99587
922	8.08966	30647.5	4.83531	-0.612593	6.21481	3.60346	7.24684	3255.57	1.1673	3189.26	1.07444	17	11	53	306	20.0055	14.2395	100222	1.40692	546.342	461.815	3.99187	9.33047	5.4767	13.4062	11.5198	13.5193	4.39542	1	3	3.48578	3.99587
923	8.93082	32973.5	5.01776	-0.595377	6.45328	3.51944	6.7495	3257.8	1.18552	3177.01	1.07027	22	15	54	362	19.3263	13.824	102381	1.40154	549	445.122	3.95419	9.35118	6.02412	14.1606	11.9464	14.3909	4.39545	1	3	3.48578	3.99587
924	9.81652	33153	4.99093	-0.614797	6.45394	3.48484	6.67126	3258.24	1.21241	3194.44	1.07428	18	12	53	320	18.8354	13.3268	103998	1.41864	542.632	440.136	3.90919	9.71533	6.05048	13.8987	12.0125	13.8028	4.39369	1	3	3.48578	3.99587
925	10.06	34938.6	5.09796	-0.606517	6.77067	3.55059	6.71025	3305.06	1.2127	3204.87	1.07087	21	14	54	390	16.9284	12.1321	106831	1.39845	551.314	439.602	3.97108	9.0221	6.0281	14.4732	12.5735	13.9341	4.40443	1	3	3.48578	3.99587
926	11.2858	37241.3	5.23839	-0.609425	6.45701	3.66167	6.8055	3193.58	1.2126	3085.38	1.0788	22	15	54	331	18.1558	12.8844	111945	1.41	539.982	433.972	4.12917	7.95121	6.09434	14.8285	12.7045	13.9477	4.3952	1	3	3.48578	3.99587
927	10.0371	34975.6	5.10619	-0.54633	5.92683	3.6983	5.94495	2981.35	1.19501	3012.32	1.06634	21	13	53	343	18.4329	13.1319	112188	1.40389	524.739	397.36	4.09025	8.5121	6.41878	15.0678	13.2359	14.4454	4.40493	1	3	3.48578	3.99587
928	8.95445	34606.3	5.05926	-0.547712	5.80131	3.69676	6.59478	2970.16	1.17785	2999.84	1.06544	24	16	52	378	17.2876	12.3151	111593	1.40734	520.146	404.499	4.10034	8.36857	5.96612	13.1688	11.0389	13.1607	4.39431	1	3	3.48578	3.99587
929	9.28222	32020.8	4.94242	-0.560839	5.92821	3.54423	6.82038	3156.16	1.16205	3070.23	1.06154	19	12	53	365	18.9171	13.4077	106302	1.41	535.383	445.762	3.97401	8.41433	6.08702	12.6951	11.8243	12.61	4.39368	1	3	3.48578	3.99587
930	7.47281	30333.5	4.89432	-0.596136	6.2573	3.57266	6.72584	3190.72	1.1435	3093.57	1.07015	23	16	54	339	18.3828	13.1152	102256	1.40457	545.026	443.116	3.9253	8.51814	5.88209	13.0336	11.9811	13.4142	4.39042	1	3	3.48578	3.99587
932	7.09173	29839.6	4.9323	-0.546708	5.67387	3.76757	6.25925	3006.36	1.13982	3008.61	1.06277	21	14	59	357	16.9742	11.993	105508	1.42	521.103	412.912	4.0789	8.75862	5.67972	13.9787	12.9541	14.3215	4.39756	1	3	3.48578	3.99587
933	9.37076	32777.7	4.96927	-0.597996	6.30423	3.52404	6.42936	3210.33	1.16755	3128.01	1.04078	20	13	64	346	17.6053	12.5354	102578	1.4049	547.448	431.136	3.94124	8.29894	5.24337	14.3387	13.5264	14.7475	4.39757	1	3	3.48578	3.99587
934	9.26619	33691.3	5.01753	-0.589897	6.36887	3.42109	6.50272	3211.48	1.18784	3117.33	1.05383	24	15	54	426	16.8709	12.0085	104290	1.40371	547.546	437.423	3.92376	8.92674	6.46113	14.0998	13.7022	15.2268	4.40229	1	3	3.48578	3.99587
935	9.04616	35214.1	5.04257	-0.607525	6.64722	3.5884	6.70931	3213.89	1.17831	3107.75	1.04231	28	19	54	346	15.9123	11.4634	108137	1.39413	550.552	439.054	3.97162	9.4767	5.88522	14.482	13.3852	14.9909	4.4168	1	3	3.48578	3.99587
936	9.09207	34757.3	5.09461	-0.571657	6.42944	3.66645	6.27286	3144.48	1.16523	3044.78	1.04988	26	18	49	399	15.9845	11.2808	113289	1.42012	544.289	415.184	4.12372	7.84424	6.70526	14.3871	13.2387	14.8081	4.40537	1	3	3.48578	3.99587
937	7.4717	31503.7	4.94753	-0.534362	6.23	3.78847	6.11949	3125.79	1.16249	3018.63	1.04477	24	16	49	328	16.9531	12.1312	105730	1.40076	534.059	402.932	4.03924	8.75561	6.86214	14.7993	14.0029	15.0304	4.40562	1	3	3.48578	3.99587
938	9.01089	34186.2	4.96879	-0.558522	6.25195	3.61303	6.88257	3197.75	1.16504	3096.35	1.05441	31	23	53	346	16.6457	11.9387	107597	1.40667	544.584	447.861	4.00206	8.24143	6.60183	14.8025	13.9236	14.9655	4.40126	1	3	3.48578	3.99587
940	6.08028	29127.7	4.91739	-0.519462	5.58116	3.81945	6.21195	3074.24	1.14284	2969.75	1.09064	27	21	56	377	16.7398	11.9509	104125	1.40613	529.07	385.646	4.07136	6.67202	6.34712	13.1129	12.6332	13.3729	4.40412	1	3	3.48578	3.99587
942	5.8862	27172.7	4.94223	-0.475388	6.32417	3.62102	6.7	3258.35	1.12612	3169.63	1.07148	21	13	54	350	17.4609	12.4073	101149	1.41	550.599	443.583	3.92478	7.99695	6.09099	14.3093	14.1049	14.1316	4.40094	1	3	3.48578	3.99587
943	5.84488	27442.4	4.87232	-0.430627	5.99797	3.72599	5.93358	3046.09	1.16647	3051.92	1.05519	25	18	55	443	15.235	10.8076	106282	1.40891	524.714	417.319	4.00202	7.97933	6.29068	13.57	12.492	13.7856	4.40035	1	3	3.48578	3.99587
944	6.76295	29587.7	4.87678	-0.478839	5.79794	3.7588	6.34028	3098.62	1.17772	2987.98	1.06346	25	15	52	453	14.9091	10.5591	101935	1.41	526.282	399.852	4.04168	8.23013	6.58353	14.8847	13.8896	14.7987	4.3994	1	3	3.48578	3.99587
945	8.40317	32122.4	4.9167	-0.464935	5.82115	3.6552	6.22722	2982.27	1.19304	2996.35	1.05487	25	16	55	419	15.1841	10.8211	103892	1.4	513.275	395.334	3.97821	8.65671	6.23915	15.0231	13.7278	14.4798	4.39989	1	3	3.48578	3.99587
946	9.15928	36821.6	4.97133	-0.469257	5.95751	3.5761	6.26486	3112.7	1.21302	3006.02	1.06332	29	18	55	477	14.2999	10.1828	110593	1.40532	527.676	401.803	3.99079	9.46773	6.6116	14.7723	13.2112	13.7241	4.39104	1	3	3.48578	3.99587
947	9.7723	37081.3	4.97158	-0.473651	5.78776	3.5665	6.30359	3098.94	1.22021	3018.3	1.06959	23	14	54	380	17.3439	12.3222	109864	1.41	509.035	405.527	3.98894	10.0615	6.96547	15.478	13.0984	13.8212	4.39156	1	3	3.48578	3.99587
948	10.0402	37050.8	4.96811	-0.525309	6.47716	3.43396	6.50883	3249.88	1.23994	3141.01	1.07534	25	15	54	400	16.7205	11.955	107807	1.4	535.615	430.893	3.90883	9.65369	6.41003	14.752	11.657	13.192	4.399	1	3	3.48578	3.99587
949	8.0862	36780.2	4.87921	-0.492504	5.3471	3.71795	6.03625	3027.99	1.24077	2893.54	1.06851	36	22	54	444	11.4589	8.20921	112686	1.39315	489.762	375.437	3.92655	7.52383	6.60408	11.4128	8.91649	10.0781	4.40958	1	3	3.48578	3.99587
950	9.16978	36346.3	4.9733	-0.446057	5.42168	3.69513	6.18316	2892.31	1.23208	2886.27	1.0693	32	21	53	336	14.1944	10.0292	113986	1.41651	492.814	383.358	4.01896	8.29924	6.33789	11.5313	8.40607	9.54875	4.4395	1	3	3.48578	3.99587
951	10.8508	38647.1	5.00985	-0.469886	5.27803	3.63214	6.11295	2867.36	1.23041	2862.85	1.06794	27	16	53	401	14.8949	10.4725	115266	1.42	489	377.915	4.05517	8.12051	6.35183	12.0064	10.0947	10.9009	4.39794	1	3	3.48578	3.99587
952	6.29868	30129.6	4.78	-0.467767	5.32272	3.62496	6.25984	2870.78	1.17385	2904.65	1.06167	37	22	54	407	15.8114	11.2616	102370	1.40422	497.798	412.154	3.94983	9.19716	5.8859	13.0032	9.6785	11.8793	4.40511	1	3	3.48578	3.99587
953	7.36491	31507.5	4.91074	-0.455785	5.73657	3.66593	6.08569	3041.12	1.17158	2958.79	1.06841	24	15	52	400	16.7579	11.9562	102841	1.4	517	402.86	4.02313	8.89376	6.13329	13.6289	11.8754	12.4602	4.40399	1	3	3.48578	3.99587
955	5.19415	25436.6	4.72102	-0.504205	2.44863	3.8747	6.17169	2779.85	1.14133	2774.1	1.07295	26	16	49	404	14.7536	10.4402	101358	1.40921	385.973	393.285	4.12317	8.20657	5.29348	14.1895	11.6499	12.4824	4.40107	1	3	3.48578	3.99587
956	5.63223	27351.7	4.78073	-0.4882	2.40587	3.82511	6.23888	2823.17	1.16638	2801.72	1.07394	25	15	50	375	14.6272	10.3867	101875	1.41	386	398.719	4.09524	7.38713	5.83496	11.6486	10.628	10.8448	4.42782	1	3	3.48578	3.99587
957	6.16096	28954	4.82636	-0.480586	2.60663	3.8265	6.19923	2924.98	1.16688	2834.94	1.07174	25	15	53	342	15.0615	10.108	100519	1.41114	393.307	397.683	4.06812	7.00724	5.41583	12.1049	11.3408	10.3742	4.40595	1	3	3.48578	3.99587
958	5.98405	29529.9	4.88558	-0.478963	2.59878	3.81784	6.39863	2869.92	1.15608	2859.24	1.08349	29	17	51	349	14.7125	10.4534	101827	1.41	395.434	410.012	4.08888	7.85831	6.30127	10.5582	11.2418	10.2531	4.40204	1	3	3.48578	3.99587
959	6.16331	28383	4.75417	-0.47767	2.82784	3.7256	6.07216	3104.76	1.13799	3009.25	1.07142	22	14	50	344	15.7	11.2285	97716.5	1.4	410.816	404.078	4.02029	7.84711	6.45914	12.0393	11.8194	11.1973	4.39372	1	3	3.48578	3.99587
960	6.49043	30009.8	4.83626	-0.429764	2.53034	3.81512	6.48157	2908.37	1.15464	2908.37	1.06608	24	15	51	371	15.3598	10.9581	99888.2	1.39996	390.494	412.754	4.08574	7.51391	5.76835	12.3167	11.5315	11.6216	4.43173	1	3	3.48578	3.99587
961	6.61082	30654.2	4.84901	-0.506766	2.68	3.77469	6.22816	2995.35	1.17592	2878.39	1.05688	28	19	53	429	13.6352	9.68612	100389	1.41257	397.888	389.883	4.05167	7.81722	6.54584	13.0536	11.793	12.3042	4.41211	1	3	3.48578	3.99587
962	7.0005	31509.7	4.80067	-0.476754	2.6005	3.75667	5.88143	2916.63	1.186	2884.97	1.04158	28	17	55	416	13.712	9.74484	101549	1.41	396.966	376.374	4.03864	7.25586	5.73957	11.732	10.3897	11.181	4.43566	1	3	3.48578	3.99587
963	8.36152	32965.8	4.87634	-0.47164	2.59173	3.70236	6.16396	2886.35	1.19405	2881.21	1.04391	25	16	55	391	14.4062	10.2762	106691	1.4	392	385.941	4.04121	6.50045	5.46776	11.4342	9.95955	11.1146	4.41903	1	3	3.48578	3.99587
964	7.87287	33302.9	4.85996	-0.473926	2.41867	3.72844	5.97615	2950.01	1.19524	2861.88	1.0551	26	16	57	357	14.9775	10.4701	106343	1.43	385	377.513	4.05939	7.34276	6.01157	11.1883	10.496	11.6342	4.40272	1	3	3.48578	3.99587
965	8.46562	33248.9	4.8845	-0.466459	2.66465	3.53432	6.16771	3089.1	1.19328	2998.93	1.05357	28	17	54	363	15.5502	11.1125	104043	1.4	399.512	411.632	3.93972	8.92262	6.44662	12.5996	12.0663	13.4107	4.39948	1	3	3.48578	3.99587
966	8.81912	34772.6	4.9672	-0.5041	2.85874	3.65492	6.30866	3096.88	1.19859	2983.01	1.04689	28	17	56	395	14.7369	10.5159	108844	1.4	403.415	412.135	4.02451	8.51948	5.62779	12.508	11.5951	13.3398	4.40215	1	3	3.48578	3.99587
967	8.96438	34396.7	4.8757	-0.518924	2.71574	3.53054	6.53103	3125.74	1.19484	3026.17	1.05271	24	15	54	344	16.088	11.475	103411	1.4	404.974	431.865	3.99264	9.64885	5.77806	13.9434	13.0553	13.6414	4.40406	1	3	3.48578	3.99587
968	7.52205	32425.1	4.82885	-0.517204	2.53907	3.71492	6.5062	3017.8	1.17481	2894.41	1.04664	29	20	56	391	14.4484	10.2978	111182	1.40511	393.742	398.19	4.01476	8.03062	6.65699	13.4281	12.7188	13.6499	4.40402	1	3	3.48578	3.99587
969	7.07265	31154.2	4.79325	-0.48707	2.52651	3.7761	6.29264	2895.49	1.16176	2884.55	1.04816	23	14	54	348	15.9282	11.3601	111558	1.40002	393	408.476	4.06061	6.99487	6.64409	13.2917	12.6736	13.3999	4.40018	1	3	3.48578	3.99587
970	6.48715	30399.1	4.85965	-0.522301	2.48	3.75802	6.29475	2919.88	1.16761	2906.36	1.05692	27	21	58	391	15.1366	10.751	108958	1.40548	395.586	408.395	4.05377	8.40687	6.623	13.5916	12.757	14.2503	4.3969	1	3	3.48578	3.99587
971	7.46726	31703.7	4.88973	-0.508934	2.80094	3.73809	6.28966	2955.44	1.17317	2939.3	1.05408	24	14	53	343	15.3129	10.9375	108499	1.4	407.721	408.177	4.10207	8.25891	6.87277	14.1627	13.2663	14.6597	4.39749	1	3	3.48578	3.99587
972	8.45929	33363.5	4.97697	-0.502932	2.81854	3.78765	6.33133	2951.37	1.18972	2937.27	1.03515	25	15	55	369	15.2333	10.8975	111964	1.4	409.739	386.403	4.12104	6.3905	6.85097	12.781	11.7951	13.626	4.39854	1	3	3.48578	3.99587
973	8.32899	33010.4	4.85194	-0.52863	2.38609	3.73727	6.37723	2925.2	1.18215	2830.19	1.05091	25	15	55	340	16.2079	11.5462	110527	1.4011	384.632	386.305	4.02807	6.65844	6.61679	13.0944	11.5986	13.4646	4.38849	1	3	3.48578	3.99587
974	7.88329	32680.9	4.83185	-0.534073	2.48569	3.75108	6.60466	2856.14	1.17998	2850.83	1.06536	25	16	56	346	16.4691	11.725	109335	1.41639	391.373	420.153	4.03137	6.09549	6.57864	12.7688	11.0313	12.775	4.40024	1	3	3.48578	3.99587
975	7.91155	31905	4.88625	-0.526719	2.96472	3.67735	6.55065	2924.56	1.17849	2920.79	1.0491	23	14	53	382	15.5435	11.1422	105935	1.38998	412.851	423.872	4.02654	6.02215	6.23219	12.8063	10.0544	12.3629	4.39789	1	3	3.48578	3.99587
976	7.57847	32263.9	5.05074	-0.532528	2.75297	3.89141	6.63896	3101.76	1.17472	2995.41	1.04345	25	15	55	360	15.7348	11.2983	108437	1.39	404.392	418.382	4.28168	7.85065	6.27824	15.2983	12.2288	13.0259	4.63484	1	3	3.48578	3.99587
977	6.91568	30983.4	4.96574	-0.519739	2.73166	3.9106	6.52197	3096.1	1.16498	2980.04	1.03305	25	15	53	366	15.0413	10.7264	106970	1.4	404.201	407.756	4.26983	9.04468	7.12548	15.4131	13.2346	13.4336	4.66279	1	3	3.48578	3.99587
980	6.89288	32212.2	5.0929	-0.573458	2.66785	4.09707	6.14068	3008.6	1.16331	2911.57	1.04691	25	14	55	252	15.0562	10.7755	114879	1.39828	406	372.194	4.37915	7.5129	5.81903	11.317	10.0065	10.0373	4.66768	1	3	3.48578	3.99587
981	6.23696	30472.9	5.07174	-0.582943	2.73729	4.0259	6.74862	3104.59	1.15834	2979.2	1.04697	35	21	55	290	13.6719	9.7646	108997	1.40212	419.087	420.118	4.31842	7.87636	5.90954	12.7197	10.8343	10.1939	4.63269	1	3	3.48578	3.99587
983	5.59385	28358.6	5.06033	-0.518512	2.76692	4.05015	6.22111	2920.23	1.11595	2901.05	1.04723	30	20	54	269	14.7205	10.4985	107238	1.40654	410.587	394.982	4.34847	7.73748	6.1102	13.5807	11.0209	10.7114	4.63717	1	3	3.48578	3.99587
984	5.52994	27845.7	5.08224	-0.519813	2.70243	4.13713	6.24468	2960.7	1.13222	2845.36	1.06961	27	16	55	261	15.4549	10.9553	107015	1.41042	407.906	389.569	4.40221	8.08307	6.0139	12.7358	10.7435	10.7313	4.66955	1	3	3.48578	3.99587
985	5.93212	28986.6	5.03989	-0.527022	2.45165	4.15288	6.15848	2907.46	1.13727	2812.96	1.07112	27	17	54	276	14.845	10.5653	108279	1.40983	392.094	381.798	4.36161	7.02208	6.26527	12.6343	11.2533	10.1416	4.64963	1	3	3.48578	3.99587
986	5.74492	27796.1	4.96062	-0.533506	2.70967	4.0293	6.51266	2962.59	1.144	2948.12	1.04384	26	16	54	287	14.2276	10.1616	103674	1.40545	412.182	412.175	4.2497	8.15092	5.7713	11.8458	9.97403	10.0262	4.66649	1	3	3.48578	3.99587
987	5.51987	27588.7	4.98722	-0.47771	2.64833	4.03511	6.64809	2943.03	1.13307	2929.76	1.06193	28	17	54	283	15.1802	10.86	104176	1.4007	409.731	415.298	4.31344	9.77553	6.18679	13.4443	11.5888	10.2158	4.66804	1	3	3.48578	3.99587
988	5.94749	28361.2	4.94891	-0.4571	2.82301	3.96502	6.53528	3127.3	1.14854	2993.45	1.04788	26	15	54	285	14.6806	10.4274	104178	1.41	410.92	413.145	4.24894	8.21302	5.7472	12.3383	11.8064	10.2006	4.6842	1	3	3.48578	3.99587
989	6.5157	29418.5	5.072	-0.528348	2.77409	4.07704	5.97991	2902.74	1.17209	2878.12	1.03974	28	17	55	304	14.1458	10.0842	106792	1.40505	408.644	376.77	4.33416	8.15387	5.8863	13.604	12.2096	11.4231	4.69139	1	3	3.48578	3.99587
990	6.97559	31619.3	5.06537	-0.518021	2.64469	4.09068	6.02111	2852.08	1.18089	2825.54	1.03701	28	16	54	272	14.1776	10.0036	108387	1.42	395	352.359	4.33197	8.56818	5.54153	13.0984	12.1108	11.5326	4.69057	1	3	3.48578	3.99587
991	8.45543	34265.5	5.27691	-0.51465	2.86831	4.20958	6.4357	2846.29	1.18095	2814.47	1.03493	30	17	57	298	13.3765	9.46483	117728	1.41777	407.833	392.675	4.53779	9.6113	6.20814	14.0631	12.9564	12.6268	4.79512	1	3	3.48578	3.99587
992	7.65043	32885.2	5.08903	-0.516547	2.81493	4.084	6.16711	2909.41	1.17957	2923.84	1.02417	26	15	55	279	14.4831	10.361	111823	1.4	407.924	386.305	4.39684	9.08141	5.97651	14.1747	12.7156	13.4528	4.81845	1	3	3.48578	3.99587
993	9.13175	35740.6	5.09191	-0.548567	3.04334	4.01042	6.95125	3185.66	1.19887	3042.48	1.0172	28	17	55	288	13.7786	9.84569	114254	1.4	419.356	424.825	4.36001	10.0321	5.81518	13.6533	11.6976	14.1522	4.84907	1	3	3.48578	3.99587
994	8.32612	34771.6	5.09403	-0.552985	3.03373	3.93813	6.42374	3198.68	1.20636	3028.71	1.02079	35	21	55	311	12.3536	8.81611	117908	1.4	423.888	403.795	4.26032	8.73414	6.20863	12.3132	11.615	12.9018	4.73967	1	3	3.48578	3.99587
995	10.9602	38870.9	5.18563	-0.544037	3.09495	3.99559	6.46651	3178.14	1.21095	3029.35	1.02254	31	19	57	315	12.5958	9.23728	122023	1.38516	418.748	409.581	4.37179	9.11993	6.08841	12.5648	11.9588	14.868	4.76968	1	3	3.58474	0.0669264
996	9.71738	37254.8	5.22508	-0.522924	3.06827	4.07973	5.87542	3010.83	1.19697	2894.48	1.01883	30	17	57	283	13.6647	11.2644	120102	1.20998	418	370.045	4.37171	8.20683	5.3428	10.4216	9.45298	13.7728	4.65921	1	3	3.58474	0.0669264
997	9.68358	37080.3	5.19464	-0.529821	3.05411	4.02632	5.70411	3015.07	1.18961	2885.89	1.02456	28	17	55	265	14.3844	11.6824	117877	1.23	418	368.204	4.38954	8.23684	6.19932	10.6457	10.9346	13.5562	4.66727	1	3	3.58474	0.0669264
998	9.01878	36360.4	5.14915	-0.516196	3.03748	4.02314	6.15062	3017.9	1.17665	2905.81	1.01556	24	15	56	256	14.8916	11.8899	112462	1.26028	418	366.522	4.35501	7.84957	6.23874	10.9142	11.4511	13.4029	4.65437	1	3	3.58474	0.0669264
1000	9.1214	36461.6	5.10239	-0.555064	3.29595	3.98194	7.31214	3244.95	1.16417	3107.16	1.01779	30	17	61	258	14.6956	12.1404	112396	1.21	445.578	450.508	4.37491	5.97511	6.31208	12.1909	11.9495	14.0168	4.79325	1	3	3.58474	0.0669264
1001	7.83841	35242.9	5.54654	-0.537107	3.20189	4.47458	7.04475	3172.36	1.16239	3005.89	1.01301	29	17	57	290	13.2493	10.9573	116502	1.21	433.488	413.77	4.83112	8.82581	6.25162	12.4161	12.7008	12.692	5.17155	1	3	3.58474	0.0669264
1002	7.39659	36500.9	5.80587	-0.532133	3.12413	4.81846	6.09613	3097.24	1.17646	2912.7	1.00959	35	21	57	313	11.4353	9.38407	125898	1.22212	421.815	346.217	5.11451	7.8485	6.21142	10.4884	11.0799	11.0338	5.49306	1	3	3.58474	0.0669264
1003	8.39932	37617.5	5.80233	-0.531778	2.98848	4.74688	6.31142	2989.25	1.18408	2846.55	1.01246	31	20	57	275	9.75408	10.0314	128057	1.20958	415	333.354	5.10485	7.79995	5.70295	10.1798	10.4886	10.695	5.51633	1	3	3.58474	0.0669264
1004	7.66577	37034.1	5.83918	-0.532602	3.36433	4.75892	7.45687	3104.89	1.17342	2949.84	1.02201	33	20	57	273	9.9098	8.28918	124292	1.2	441.737	418.065	5.09856	9.12518	6.45311	12.2618	11.9124	12.4882	5.47944	1	3	3.58474	0.0669264
1005	7.77814	36796.6	5.83846	-0.554828	3.41997	4.76653	7.46923	3168.3	1.17413	2995.03	1.0145	28	17	57	239	13.795	11.4665	122154	1.2	438.108	418.258	5.07793	9.91879	6.57296	13.2346	12.3972	13.2782	5.4789	1	3	3.58474	0.0669264
1006	6.38125	36009.5	6.16567	-0.579896	4.29896	5.07581	7.87226	3394.52	1.16255	3214.2	1.00568	39	24	57	312	10.8861	9.01935	124404	1.20751	487.497	429.817	5.38417	10.8212	6.16408	14.2708	12.673	14.2852	5.88018	1	3	3.58474	0.0669264
1007	6.57697	36971	6.40488	-0.564947	3.4478	5.21852	6.96419	3203.14	1.15137	3025.03	1.01986	33	22	56	263	12.7175	10.6144	127534	1.2001	444.361	387.244	5.48419	10.2481	5.93191	14.1991	12.6208	13.9465	5.88542	1	3	3.58474	0.0669264
1008	6.9932	37563.9	6.28003	-0.584824	3.39537	5.17484	7.3195	3188.48	1.14929	3033.57	1.01742	29	20	57	248	11.2484	9.26406	133246	1.22	444.589	396.942	5.469	7.75847	4.97801	11.6524	10.5157	10.9736	5.8756	1	3	3.58474	0.0669264
1009	7.10806	37463.4	6.41633	-0.545286	3.56972	5.44708	7.16042	2983.25	1.15376	2861.97	1.04427	26	18	57	231	14.5687	12.1536	134745	1.2	440.657	368.757	5.68469	8.15078	5.21977	11.8618	10.6083	12.0242	6.14452	1	3	3.58474	0.0669264
1010	6.37382	38061.7	6.52583	-0.547763	3.58788	5.51427	6.81111	3095.51	1.16019	2915.24	1.02728	30	22	56	283	9.47778	7.80635	134379	1.21767	439.724	352.368	5.76725	8.23598	5.11833	13.126	12.139	12.4221	6.16772	1	3	3.58474	0.0669264
1011	6.13983	37083.8	6.38419	-0.545258	3.98869	5.39849	7.74568	3240.92	1.137	3064.39	1.03139	27	19	56	242	14.0015	11.5347	130694	1.21613	471.458	408.551	5.65165	10.19	5.2075	13.2002	10.0126	13.6407	6.14167	1	3	3.58474	0.0669264
1012	6.43145	36923.5	6.69091	-0.513879	4.47918	5.3871	8.03666	3312.82	1.13124	3148.81	1.02985	25	18	57	257	14.6191	12.2411	130425	1.19	486.995	424.446	5.71898	10.3637	4.839	13.1563	11.0843	13.3701	6.17095	1	3	3.58474	0.0669264
1013	5.69485	35615	6.39921	-0.532547	4.56464	5.34339	7.70324	3317.71	1.13715	3145.6	1.01866	29	20	58	301	12.8142	10.6909	129404	1.2	485.927	412.211	5.66463	10.9244	5.16828	15.3428	13.3696	14.8922	6.17785	1	3	3.58474	0.0669264
1014	6.65941	36111	6.47397	-0.528277	3.79101	5.45108	7.6912	3167.41	1.12379	3037.01	1.02649	26	19	54	237	15.9418	12.7457	141326	1.24731	475.187	405.829	5.71772	9.37142	5.55271	14.9048	13.4431	14.1959	6.15433	1	3	3.58474	0.0669264
1015	6.87623	36688	6.59342	-0.545155	4.16145	5.4634	7.56114	3104.48	1.14096	2981.92	1.03666	24	17	57	248	15.4651	12.6764	138560	1.22	464.401	375.157	5.84607	7.76079	4.91361	12.7403	11	12.4463	6.17078	1	3	3.58474	0.0669264
1016	7.15224	37735.8	6.51166	-0.546484	3.82213	5.47228	7.66096	3129.91	1.16474	2971.1	1.01776	27	18	57	272	13.9518	11.4584	133431	1.22	458.665	396.007	5.73611	9.36289	4.905	13.7941	11.2125	13.8542	6.17011	1	3	3.58474	0.0669264
1017	5.91686	37951.6	6.44334	-0.504815	3.75827	5.43849	7.99894	3112.09	1.14749	2958.08	1.03108	29	21	56	286	13.2426	11.0118	133374	1.20704	451.234	414.663	5.7538	11.437	4.84998	15.1095	11.9519	14.6122	6.17555	1	3	3.58474	0.0669264
1018	5.79633	35147.7	6.51802	-0.498168	3.71145	5.53497	8.12679	3127.87	1.13576	2942.12	1.01771	29	21	56	297	12.6502	10.4586	138537	1.21	447.464	414.875	5.78407	11.7908	4.68281	15.9348	13.2359	14.931	6.20536	1	3	3.58474	0.0669264
1019	6.29878	36824.7	6.57955	-0.548699	4.0026	5.55828	7.75276	3199.16	1.13578	3040.92	1.03443	24	19	56	245	15.3201	12.6123	143386	1.21503	470.609	400.62	5.84408	10.3373	4.86256	15.665	13.4392	13.8894	6.18996	1	3	3.58474	0.0669264
1020	6.4273	36963.8	6.53778	-0.534815	3.96046	5.5284	7.47847	3086.68	1.13606	2953.17	1.03503	26	20	57	253	15.5635	12.7771	138179	1.22185	457.933	385.885	5.80835	9.81336	4.80019	13.5792	11.4642	12.2869	6.2036	1	3	3.58474	0.0669264
1021	6.51127	37323.5	6.65354	-0.546465	4.25534	5.57282	7.31082	3132.93	1.14966	2974.04	1.02528	27	19	57	272	14.099	11.6093	139669	1.21351	467.033	374.465	5.86473	9.1966	5.07841	14.4737	13.0957	12.065	6.20178	1	3	3.58474	0.0669264
1022	6.2824	37299.6	6.76319	-0.535229	3.99605	5.4526	7.67747	3135.55	1.15193	2974.15	1.01776	28	20	57	293	11.3351	9.31864	135734	1.22632	461.567	398.861	5.84615	9.71639	5.25284	14.2205	13.5036	13.1421	6.19273	1	3	3.58474	0.0669264
1023	6.23354	36854.7	6.56554	-0.517231	3.92538	5.53016	7.78542	3160.78	1.1387	2961.23	1.01975	29	22	57	298	13.0544	10.8236	139352	1.2049	463.02	400.381	5.83696	10.8119	5.69333	14.3109	13.5624	13.6687	6.20468	1	3	3.58474	0.0669264
1025	5.86968	36564.8	6.597	-0.52776	4.32601	5.58466	7.67269	3178.6	1.13068	2991.92	1.02267	28	19	48	287	13.4454	11.2221	140659	1.2	470	393.022	5.8829	6.53011	5.76381	13.2578	12.4528	12.8198	6.21042	1	3	3.58474	0.0669264
1026	6.64373	36891.5	6.40529	-0.534307	3.90018	5.34406	7.33895	3123.89	1.14044	2965.35	1.02312	25	19	58	241	15.0797	12.2202	137163	1.24171	457.113	368.686	5.66504	8.67619	5.03577	12.2344	10.4701	12.6184	5.97075	1	3	3.58474	0.0669264
1027	6.79025	37218.7	6.50185	-0.534564	3.77701	5.3704	7.62918	3105.74	1.14487	2933.39	1.03473	31	27	57	267	14.0672	11.5573	134699	1.22371	452.023	374.819	5.62439	8.59281	5.03102	12.5745	10.6625	12.6105	5.91984	1	3	3.58474	0.0669264
1028	6.43512	36850	6.42228	-0.543234	4.19034	5.35537	7.70136	3186.68	1.14838	3011.99	1.02141	30	23	58	279	13.3203	11.0093	133372	1.20909	466.17	405.276	5.58804	7.68845	5.9043	13.2191	11.386	12.5791	5.93345	1	3	3.58474	0.0669264
1029	6.76867	36173.4	6.35546	-0.518259	4.22389	5.32461	7.6564	3212.35	1.14563	3052.39	1.0171	28	19	57	262	13.7271	11.4651	130551	1.2	468.186	405.578	5.60032	8.8914	6.35922	13.9906	12.1939	12.0095	5.95903	1	3	3.58474	0.0669264
1030	7.56277	38055.3	6.35141	-0.51625	4.14016	5.26718	7.5686	3209.84	1.15359	3026.69	1.0105	29	21	57	290	13.1417	10.9486	131612	1.20257	466.6	403.553	5.56502	9.72717	5.82514	13.0032	11.0961	12.0322	5.96227	1	3	3.58474	0.0669264
1031	7.02717	37826.3	6.47075	-0.502721	3.97007	5.32563	7.64916	3193.64	1.15018	3048.79	1.01985	27	18	58	280	14.5766	11.9088	141431	1.22003	465	404.766	5.5793	8.7378	6.53539	12.9381	11.533	11.7272	5.93743	1	3	3.58474	0.0669264
1032	6.68267	37907	6.34839	-0.539478	3.93441	5.2757	7.42367	3163.86	1.16681	3001.69	1.01449	30	20	57	305	12.498	10.2732	138622	1.2198	461	393.806	5.5737	8.98663	5.70198	13.0607	11.373	11.3797	5.96228	1	3	3.58474	0.0669264
1033	8.10649	39275.6	6.2978	-0.51617	4.40608	5.18525	7.73454	3232.18	1.17378	3072.22	1.00977	30	21	52	302	12.7911	10.6357	138695	1.20113	472.154	415.426	5.529	9.44487	5.4373	13.4263	12.2944	11.8358	5.96328	1	3	3.58474	0.0669264
1034	8.13066	40649.9	6.34294	-0.51935	4.06554	5.19488	7.89162	3224.12	1.1809	3051.9	1.00604	32	23	58	332	12.4856	10.3782	140283	1.20348	466.878	418.342	5.58022	8.52442	5.14654	13.4439	11.5085	13.4988	5.99026	1	3	3.58474	0.0669264
1035	7.74721	40180.4	6.39061	-0.508526	4.12486	5.2708	7.56317	3213.05	1.18513	3050.09	1.00757	31	23	57	326	12.4402	10.2925	141100	1.21	468.467	391.655	5.61854	8.67573	5.20076	13.1825	12.8137	13.9549	6.01631	1	3	3.58474	0.0669264
1036	8.42347	39306.8	6.92896	-0.52204	4.13297	5.27733	6.88889	3086.81	1.19214	2954.7	1.01292	25	17	57	253	15.141	12.3486	138195	1.23	461	364.623	5.60861	8.50278	5.29164	13.4067	12.756	12.3457	5.97208	1	3	3.58474	0.0669264
1037	8.40443	41698.6	6.49324	-0.540561	4.14962	5.25994	6.90765	3196.61	1.20494	3025.24	1.00928	37	25	59	347	8.27972	6.72589	141724	1.23783	463.807	371.62	5.60403	9.12591	5.29249	13.0768	12.3249	12.8651	6.00783	1	3	3.58474	0.0669264
1038	9.38068	42152.6	6.49677	-0.543156	3.99183	5.27555	7.58934	3155.94	1.19564	3045.71	1.01088	24	17	57	244	13.4937	11.031	137204	1.22	459	380.483	5.6101	8.38317	4.91401	12.5457	10.1362	13.1787	5.94262	1	3	3.58474	0.0669264
